# Supplementary material for: The role of ROC75 as a daytime component of the circadian oscillator in Chlamydomonas reinhardtii
Source: PLoS Genet. 2020 Jun 17;16(6):e1008814. doi: 10.1371/journal.pgen.1008814 (PMC7299327; doi:10.1371/journal.pgen.1008814)
Supplement: S1 Table — (XLSX) [file pgen.1008814.s012.xlsx]

## Sheet: Creinhardtii_281_v5.5.annotatio
Cre03.g146267	1		Cre03.g146267	1	30786551	Cre03.g146267.t1.1	Cre03.g146267.t1.1		PTHR14493	KOG1595				AT2G41900.1		CCCH-type zinc finger protein with ARM repeat domain
Cre12.g558300	2		Cre03.g146267	1	30786552	Cre03.g146267.t2.1	Cre03.g146267.t2.1		PTHR14493	KOG1595				AT5G12850.1		CCCH-type zinc finger protein with ARM repeat domain
Cre04.g213350	3		Cre12.g558300	2	30791951	Cre12.g558300.t1.1	Cre12.g558300.t1.1	PF00069,PF07714	PTHR23257,PTHR23257:SF99	KOG0192			GO:0004672,GO:0005524,GO:0006468	AT1G16270.1		Protein kinase superfamily protein with octicosapeptide/Phox/Bem1p domain
Cre09.g410450	4		Cre04.g213350	3	30791447	Cre04.g213350.t1.1	Cre04.g213350.t1.1
Cre10.g425050	5		Cre09.g410450	4	30780486	Cre09.g410450.t1.2	Cre09.g410450.t1.2	PF00249						AT3G10760.1		Homeodomain-like superfamily protein
Cre03.g213089	6		Cre10.g425050	5	30790463	Cre10.g425050.t1.1	Cre10.g425050.t1.1	PF00400	PTHR15574,PTHR15574:SF6	KOG1310		K11807		AT5G10940.2		transducin family protein / WD-40 repeat family protein
Cre06.g278200	7		Cre03.g213089	6	30787642	Cre03.g213089.t1.1	Cre03.g213089.t1.1
Cre06.g275350	8		Cre06.g278200	7	30779660	Cre06.g278200.t1.1	Cre06.g278200.t1.1	PF06203		KOG0811			GO:0005515	AT5G24930.1	ATCOL4,COL4	CONSTANS-like 4
Cre10.g465550	9		Cre06.g275350	8	30778881	Cre06.g275350.t1.1	Cre06.g275350.t1.1	PF00249	PTHR12802:SF3,PTHR12802	KOG0048		K12134		AT1G01060.1	LHY,LHY1	Homeodomain-like superfamily protein
Cre06.g286950	10		Cre10.g465550	9	30790230	Cre10.g465550.t1.1	Cre10.g465550.t1.1	PF02861,PF00004,PF07724,PF10431	PTHR11638	KOG1051			GO:0019538,GO:0005524	AT5G51070.1	CLPD,ERD1,SAG15	Clp ATPase
Cre02.g083750	11		Cre06.g286950	10	30778536	Cre06.g286950.t1.2	Cre06.g286950.t1.2							AT3G04710.1		ankyrin repeat family protein
Cre16.g673100	12		Cre02.g083750	11	30785302	Cre02.g083750.t1.1	Cre02.g083750.t1.1	PF00249						AT3G46640.1	LUX,PCL1	Homeodomain-like superfamily protein
Cre11.g467605	13		Cre02.g083750	11	30785303	Cre02.g083750.t2.1	Cre02.g083750.t2.1	PF00249						AT3G46640.1	LUX,PCL1	Homeodomain-like superfamily protein
Cre16.g673600	14		Cre16.g673100	12	30777624	Cre16.g673100.t1.1	Cre16.g673100.t1.1
Cre01.g018650	15		Cre11.g467605	13	30775967	Cre11.g467605.t1.1	Cre11.g467605.t1.1
Cre11.g480551	16		Cre16.g673600	14	30777348	Cre16.g673600.t1.1	Cre16.g673600.t1.1	PF00069	PTHR24349,PTHR24349:SF107	KOG0032			GO:0004672,GO:0005524,GO:0006468	AT2G45490.1	AtAUR3,AUR3	ataurora3
Cre16.g678900	17		Cre01.g018650	15	30788421	Cre01.g018650.t1.1	Cre01.g018650.t1.1	PF01342	PTHR14955,PTHR14955:SF5				GO:0003677,GO:0005634	AT1G04020.2	ATBARD1,BARD1,ROW1	breast cancer associated RING 1
Cre01.g020751	18		Cre11.g480551	16	30775909	Cre11.g480551.t1.2	Cre11.g480551.t1.2
Cre07.g332250	19		Cre16.g678900	17	30778058	Cre16.g678900.t1.2	Cre16.g678900.t1.2	PF00072	PTHR26402:SF251,PTHR26402				GO:0000156,GO:0000160,GO:0006355	AT2G01830.2	AHK4,ATCRE1,CRE1,WOL,WOL1	CHASE domain containing histidine kinase protein
Cre16.g681351	20		Cre01.g020751	18	30789634	Cre01.g020751.t1.2	Cre01.g020751.t1.2
Cre01.g001300	21		Cre07.g332250	19	30775097	Cre07.g332250.t1.2	Cre07.g332250.t1.2	PF00010					GO:0006355,GO:0030528
Cre14.g611300	22		Cre16.g681351	20	30777290	Cre16.g681351.t1.2	Cre16.g681351.t1.2
Cre16.g676421	23		Cre01.g001300	21	30789566	Cre01.g001300.t1.1	Cre01.g001300.t1.1
Cre12.g555803	24		Cre14.g611300	22	30776530	Cre14.g611300.t1.1	Cre14.g611300.t1.1	PF01036					GO:0005216,GO:0006811,GO:0016020
Cre13.g604450	25		Cre16.g676421	23	30777897	Cre16.g676421.t1.1	Cre16.g676421.t1.1	PF06203,PF00072	PTHR26402:SF51,PTHR26402			K12127	GO:0005515,GO:0000156,GO:0000160,GO:0006355	AT5G61380.1	APRR1,AtTOC1,PRR1,TOC1	CCT motif -containing response regulator protein
Cre10.g426500	26		Cre12.g555803	24	30793205	Cre12.g555803.t1.1	Cre12.g555803.t1.1	PF07992	PTHR22915,PTHR22915:SF5	KOG2495				AT3G44190.1		FAD/NAD(P)-binding oxidoreductase family protein
Cre01.g066917	27		Cre13.g604450	25	30784169	Cre13.g604450.t1.1	Cre13.g604450.t1.1			KOG0487
Cre03.g163900	28		Cre10.g426500	26	30790050	Cre10.g426500.t1.2	Cre10.g426500.t1.2
Cre14.g617150	29		Cre01.g066917	27	30788321	Cre01.g066917.t1.1	Cre01.g066917.t1.1	PF00504	PTHR21649			K08913	GO:0009765,GO:0016020	AT2G05070.1	LHCB2,LHCB2.2	photosystem II light harvesting complex gene 2.2
Cre05.g237910	30		Cre03.g163900	28	30787432	Cre03.g163900.t1.1	Cre03.g163900.t1.1	PF04720						AT3G54550.1		Protein of unknown function (DUF506)
Cre03.g159600	31		Cre14.g617150	29	30776674	Cre14.g617150.t1.1	Cre14.g617150.t1.1	PF03062	PTHR13285,PTHR13285:SF15	KOG3860				AT1G57600.1		MBOAT (membrane bound O-acyl transferase) family protein
Cre07.g325500	32		Cre05.g237910	30	30782988	Cre05.g237910.t1.1	Cre05.g237910.t1.1
Cre17.g738150	33		Cre03.g159600	31	30786790	Cre03.g159600.t1.2	Cre03.g159600.t1.2
Cre16.g692250	34		Cre07.g325500	32	30775304	Cre07.g325500.t1.1	Cre07.g325500.t1.1	PF11965,PF02514	PTHR23304:SF77,PTHR23304		6.6.1.1	K03403	GO:0016851,GO:0009058	AT5G13630.1	ABAR,CCH,CCH1,CHLH,GUN5	magnesium-chelatase subunit chlH, chloroplast, putative / Mg-protoporphyrin IX chelatase, putative (CHLH)
Cre02.g113200	35		Cre17.g738150	33	30781934	Cre17.g738150.t1.1	Cre17.g738150.t1.1	PF02714	PTHR13018,PTHR13018:SF21				GO:0016020	AT4G02900.1		ERD (early-responsive to dehydration stress) family protein
Cre06.g295200	36		Cre16.g692250	34	30777122	Cre16.g692250.t1.1	Cre16.g692250.t1.1	PF00170					GO:0003700,GO:0006355,GO:0043565,GO:0046983
Cre06.g270950	37		Cre02.g113200	35	30784960	Cre02.g113200.t1.1	Cre02.g113200.t1.1	PF03951,PF00120	PTHR20852:SF14,PTHR20852	KOG0683	6.3.1.2	K01915	GO:0004356,GO:0006542,GO:0006807	AT3G17820.1	ATGSKB6,GLN1.3,GLN1;3	glutamine synthetase 1.3
Cre10.g459350	38		Cre06.g295200	36	30779851	Cre06.g295200.t1.2	Cre06.g295200.t1.2	PF03441,PF00875	PTHR11455	KOG0133		K12118	GO:0003913,GO:0006281	AT4G08920.1	ATCRY1,BLU1,CRY1,HY4,OOP2	cryptochrome 1
Cre01.g015850	39		Cre06.g270950	37	30780121	Cre06.g270950.t1.2	Cre06.g270950.t1.2
Cre16.g681400	40		Cre10.g459350	38	30789913	Cre10.g459350.t1.1	Cre10.g459350.t1.1	PF08373						AT2G31890.1	ATRAP,RAP	RAP
Cre16.g662702	41		Cre01.g015850	39	30788657	Cre01.g015850.t1.1	Cre01.g015850.t1.1
Cre10.g449450	42		Cre16.g681400	40	30778204	Cre16.g681400.t1.1	Cre16.g681400.t1.1
Cre06.g284250	43		Cre16.g662702	41	30778140	Cre16.g662702.t1.1	Cre16.g662702.t1.1	PF00076	PTHR24012:SF9,PTHR24012	KOG4205			GO:0003676	AT4G36960.1		RNA-binding (RRM/RBD/RNP motifs) family protein
Cre13.g590900	44		Cre10.g449450	42	30790329	Cre10.g449450.t1.1	Cre10.g449450.t1.1
Cre12.g548400	45		Cre06.g284250	43	30779962	Cre06.g284250.t1.2	Cre06.g284250.t1.2	PF00504	PTHR21649			K08913	GO:0009765,GO:0016020	AT2G05100.1	LHCB2,LHCB2.1	photosystem II light harvesting complex gene 2.1
Cre03.g191250	46		Cre13.g590900	44	30784101	Cre13.g590900.t1.2	Cre13.g590900.t1.2	PF00097	PTHR11210:SF15,PTHR11210	KOG1493		K03358		AT3G05870.1	APC11	anaphase-promoting complex/cyclosome 11
Cre06.g278193	47		Cre13.g590900	44	30784102	Cre13.g590900.t2.1	Cre13.g590900.t2.1	PF00097	PTHR11210:SF15,PTHR11210	KOG1493		K03358		AT3G05870.1	APC11	anaphase-promoting complex/cyclosome 11
Cre11.g481650	48		Cre12.g548400	45	30793460	Cre12.g548400.t1.2	Cre12.g548400.t1.2	PF00504	PTHR21649			K08913	GO:0009765,GO:0016020	AT2G05070.1	LHCB2,LHCB2.2	photosystem II light harvesting complex gene 2.2
Cre01.g030750	49		Cre03.g191250	46	30786958	Cre03.g191250.t1.2	Cre03.g191250.t1.2
Cre06.g278120	50		Cre06.g278193	47	30779357	Cre06.g278193.t1.1	Cre06.g278193.t1.1
Cre04.g228350	51		Cre11.g481650	48	30775776	Cre11.g481650.t1.2	Cre11.g481650.t1.2		PTHR13161,PTHR13161:SF11
Cre07.g333500	52		Cre01.g030750	49	30788715	Cre01.g030750.t1.1	Cre01.g030750.t1.1
Cre06.g296050	53		Cre06.g278120	50	30779891	Cre06.g278120.t1.1	Cre06.g278120.t1.1
Cre02.g083700	54		Cre06.g278120	50	30779892	Cre06.g278120.t2.1	Cre06.g278120.t2.1
Cre02.g081950	55		Cre04.g228350	51	30791317	Cre04.g228350.t1.1	Cre04.g228350.t1.1	PF00198,PF00364,PF02817	PTHR23151,PTHR23151:SF11	KOG0559	2.3.1.168	K09699	GO:0008152,GO:0008415,GO:0043754,GO:0046949,GO:0048037	AT3G06850.1	BCE2,DIN3,LTA1	2-oxoacid dehydrogenases acyltransferase family protein
Cre06.g285250	56		Cre07.g333500	52	30774413	Cre07.g333500.t1.2	Cre07.g333500.t1.2
Cre13.g588150	57		Cre06.g296050	53	30779338	Cre06.g296050.t1.1	Cre06.g296050.t1.1	PF00743	PTHR23023,PTHR23023:SF22	KOG1399			GO:0004499,GO:0050660,GO:0050661,GO:0055114	AT1G19250.1	FMO1	flavin-dependent monooxygenase 1
Cre06.g283950	58		Cre02.g083700	54	30785961	Cre02.g083700.t1.1	Cre02.g083700.t1.1
Cre07.g352950	59		Cre02.g081950	55	30785170	Cre02.g081950.t1.1	Cre02.g081950.t1.1	PF00069	PTHR24347,PTHR24347:SF121				GO:0004672,GO:0005524,GO:0006468	AT3G63260.1	ATMRK1	Protein kinase superfamily protein
Cre01.g014200	60		Cre06.g285250	56	30779463	Cre06.g285250.t1.2	Cre06.g285250.t1.2	PF00504	PTHR21649			K08913	GO:0009765,GO:0016020	AT2G05100.1	LHCB2,LHCB2.1	photosystem II light harvesting complex gene 2.1
Cre07.g352950	61		Cre13.g588150	57	30784111	Cre13.g588150.t1.2	Cre13.g588150.t1.2		PTHR20884,PTHR20884:SF3	KOG2720	2.7.7.69	K14190		AT5G55120.1	VTC5	galactose-1-phosphate guanylyltransferase (GDP)s;GDP-D-glucose phosphorylases;quercetin 4\'-O-glucosyltransferases
Cre03.g195388	62		Cre06.g283950	58	30779716	Cre06.g283950.t1.2	Cre06.g283950.t1.2	PF00504	PTHR21649			K08913	GO:0009765,GO:0016020	AT2G05100.1	LHCB2,LHCB2.1	photosystem II light harvesting complex gene 2.1
Cre02.g093500	63		Cre07.g352950	59	30774692	Cre07.g352950.t1.1	Cre07.g352950.t1.1	PF02463		KOG3262			GO:0005524,GO:0005694
Cre16.g649433	64		Cre01.g014200	60	30788482	Cre01.g014200.t1.2	Cre01.g014200.t1.2
Cre06.g295600	65		Cre03.g195388	62	30787347	Cre03.g195388.t1.1	Cre03.g195388.t1.1
Cre13.g579650	66		Cre02.g093500	63	30786143	Cre02.g093500.t1.2	Cre02.g093500.t1.2	PF02460	PTHR10796,PTHR10796:SF32	KOG1934			GO:0008158,GO:0016020	AT4G38350.1		Patched family protein
Cre05.g234660	67		Cre02.g093500	63	30786144	Cre02.g093500.t2.1	Cre02.g093500.t2.1	PF02460	PTHR10796,PTHR10796:SF32	KOG1934			GO:0008158,GO:0016020	AT4G38350.1		Patched family protein
Cre09.g411500	68		Cre16.g649433	64	30777250	Cre16.g649433.t1.1	Cre16.g649433.t1.1	PF00847					GO:0003700,GO:0006355	AT3G16770.1	ATEBP,EBP,ERF72,RAP2.3	ethylene-responsive element binding protein
Cre07.g325741	69		Cre06.g295600	65	30779135	Cre06.g295600.t1.2	Cre06.g295600.t1.2	PF05063	PTHR12829		2.1.1.62	K05925	GO:0006139,GO:0008168	AT4G10760.1	EMB1706,MTA	mRNAadenosine methylase
Cre15.g634750	70		Cre13.g579650	66	30784485	Cre13.g579650.t1.1	Cre13.g579650.t1.1	PF00069	PTHR23257:SF345,PTHR23257				GO:0004672,GO:0005524,GO:0006468	AT1G04700.1		PB1 domain-containing protein tyrosine kinase
Cre06.g283050	71		Cre05.g234660	67	30783362	Cre05.g234660.t1.1	Cre05.g234660.t1.1	PF00097
Cre03.g156200	72		Cre09.g411500	68	30781031	Cre09.g411500.t1.1	Cre09.g411500.t1.1	PF01156	PTHR12304					AT5G18860.1		inosine-uridine preferring nucleoside hydrolase family protein
Cre04.g225250	73		Cre09.g411500	68	30781033	Cre09.g411500.t2.1	Cre09.g411500.t2.1	PF01156	PTHR12304	KOG2938				AT5G18860.1		inosine-uridine preferring nucleoside hydrolase family protein
Cre03.g156900	74		Cre07.g325741	69	30774923	Cre07.g325741.t1.1	Cre07.g325741.t1.1	PF01384	PTHR11101:SF7,PTHR11101	KOG2493			GO:0005315,GO:0006817,GO:0016020	AT3G26570.1	ORF02,PHT2;1	phosphate transporter 2;1
Cre17.g721400	75		Cre15.g634750	70	30783766	Cre15.g634750.t1.1	Cre15.g634750.t1.1	PF04720						AT1G62420.1		Protein of unknown function (DUF506)
Cre13.g573400	76		Cre06.g283050	71	30779127	Cre06.g283050.t1.2	Cre06.g283050.t1.2	PF00504	PTHR21649			K08907	GO:0009765,GO:0016020	AT3G54890.1	LHCA1	photosystem I light harvesting complex gene 1
Cre08.g358547	77		Cre03.g156200	72	30786679	Cre03.g156200.t1.1	Cre03.g156200.t1.1
Cre03.g202785	78		Cre03.g156200	72	30786680	Cre03.g156200.t2.1	Cre03.g156200.t2.1
Cre09.g402950	79		Cre03.g156200	72	30786681	Cre03.g156200.t3.1	Cre03.g156200.t3.1	PF00059					GO:0005488
Cre16.g663200	80		Cre04.g225250	73	30791550	Cre04.g225250.t1.1	Cre04.g225250.t1.1
Cre01.g008402	81		Cre03.g156900	74	30787808	Cre03.g156900.t1.2	Cre03.g156900.t1.2	PF00504	PTHR21649				GO:0009765,GO:0016020	AT2G05070.1	LHCB2,LHCB2.2	photosystem II light harvesting complex gene 2.2
			Cre17.g721400	75	30782230	Cre17.g721400.t1.1	Cre17.g721400.t1.1
			Cre13.g573400	76	30784427	Cre13.g573400.t1.2	Cre13.g573400.t1.2
			Cre08.g358547	77	30773579	Cre08.g358547.t1.1	Cre08.g358547.t1.1
			Cre03.g202785	78	30788174	Cre03.g202785.t1.1	Cre03.g202785.t1.1
			Cre09.g402950	79	30780580	Cre09.g402950.t1.1	Cre09.g402950.t1.1							AT5G08540.1
			Cre16.g663200	80	30777827	Cre16.g663200.t1.1	Cre16.g663200.t1.1	PF00069,PF00027	PTHR24351:SF124,PTHR24351	KOG0614	2.7.11.12	K07376	GO:0004672,GO:0005524,GO:0006468	AT2G20050.2		protein serine/threonine phosphatases;protein kinases;catalytics;cAMP-dependent protein kinase regulators;ATP binding;protein serine/threonine phosphatases
			Cre01.g008402	81	30788338	Cre01.g008402.t1.1	Cre01.g008402.t1.1	PF00069	PTHR23257,PTHR23257:SF99				GO:0004672,GO:0005524,GO:0006468	AT2G40860.1		protein kinase family protein / protein phosphatase 2C ( PP2C) family protein
			Cre01.g000017	#N/A	30789166	Cre01.g000017.t1.1	Cre01.g000017.t1.1
			Cre01.g000033	#N/A	30788883	Cre01.g000033.t1.1	Cre01.g000033.t1.1
			Cre01.g000050	#N/A	30788759	Cre01.g000050.t1.1	Cre01.g000050.t1.1	PF02042						AT4G35590.1		RWP-RK domain-containing protein
			Cre01.g000100	#N/A	30789394	Cre01.g000100.t1.1	Cre01.g000100.t1.1
			Cre01.g000150	#N/A	30789229	Cre01.g000150.t1.2	Cre01.g000150.t1.2	PF02535	PTHR11040,PTHR11040:SF30	KOG1558			GO:0016020,GO:0030001,GO:0046873,GO:0055085	AT2G04032.1	ZIP7	zinc transporter 7 precursor
			Cre01.g000200	#N/A	30788431	Cre01.g000200.t1.1	Cre01.g000200.t1.1
			Cre01.g000250	#N/A	30788448	Cre01.g000250.t1.2	Cre01.g000250.t1.2	PF09335	PTHR12677	KOG3140				AT1G22850.1		SNARE associated Golgi protein family
			Cre01.g000300	#N/A	30789049	Cre01.g000300.t1.1	Cre01.g000300.t1.1	PF00561	PTHR10992,PTHR10992:SF283	KOG4409				AT4G24160.1		alpha/beta-Hydrolases superfamily protein
			Cre01.g000350	#N/A	30788481	Cre01.g000350.t1.1	Cre01.g000350.t1.1	PF00175	PTHR19370,PTHR19370:SF9				GO:0016491,GO:0055114	AT1G15140.1		FAD/NAD(P)-binding oxidoreductase
			Cre01.g000400	#N/A	30789110	Cre01.g000400.t1.2	Cre01.g000400.t1.2	PF03407	PTHR10994:SF5,PTHR10994				GO:0005783	AT2G35610.1	XEG113	xyloglucanase 113
			Cre01.g000450	#N/A	30788617	Cre01.g000450.t1.2	Cre01.g000450.t1.2	PF03407	PTHR10994:SF5,PTHR10994				GO:0005783	AT2G35610.1	XEG113	xyloglucanase 113
			Cre01.g000500	#N/A	30788357	Cre01.g000500.t1.1	Cre01.g000500.t1.1	PF03407	PTHR10994:SF5,PTHR10994				GO:0005783	AT2G35610.1	XEG113	xyloglucanase 113
			Cre01.g000550	#N/A	30789177	Cre01.g000550.t1.2	Cre01.g000550.t1.2	PF03407	PTHR10994:SF5,PTHR10994				GO:0005783	AT2G35610.1	XEG113	xyloglucanase 113
			Cre01.g000600	#N/A	30789603	Cre01.g000600.t1.2	Cre01.g000600.t1.2	PF00400,PF08154	PTHR19848	KOG0271				AT5G52820.1		WD-40 repeat family protein / notchless protein, putative
			Cre01.g000650	#N/A	30788868	Cre01.g000650.t1.1	Cre01.g000650.t1.1	PF01179,PF02728,PF02727	PTHR10638,PTHR10638:SF12	KOG1186			GO:0005507,GO:0008131,GO:0009308,GO:0048038,GO:0055114	AT2G42490.1		Copper amine oxidase family protein
			Cre01.g000700	#N/A	30788738	Cre01.g000700.t1.1	Cre01.g000700.t1.1	PF00097	PTHR10588:SF7,PTHR10588	KOG1493				AT3G03550.1		RING/U-box superfamily protein
			Cre01.g000750	#N/A	30789450	Cre01.g000750.t1.1	Cre01.g000750.t1.1			KOG3879				AT4G24204.3		RING/U-box superfamily protein
			Cre01.g000800	#N/A	30788536	Cre01.g000800.t1.2	Cre01.g000800.t1.2							AT1G78995.1
			Cre01.g000800	#N/A	30788537	Cre01.g000800.t2.1	Cre01.g000800.t2.1							AT1G78995.1
			Cre01.g000850	#N/A	30789292	Cre01.g000850.t1.2	Cre01.g000850.t1.2	PF11460						AT3G17930.1
			Cre01.g000900	#N/A	30788866	Cre01.g000900.t1.2	Cre01.g000900.t1.2	PF07082						AT5G47860.1		Protein of unknown function (DUF1350)
			Cre01.g000950	#N/A	30789479	Cre01.g000950.t1.1	Cre01.g000950.t1.1	PF07690	PTHR24003:SF275,PTHR24003				GO:0016021,GO:0055085	AT5G64500.1		Major facilitator superfamily protein
			Cre01.g001000	#N/A	30788363	Cre01.g001000.t1.1	Cre01.g001000.t1.1
			Cre01.g001100	#N/A	30788546	Cre01.g001100.t1.2	Cre01.g001100.t1.2
			Cre01.g001150	#N/A	30789149	Cre01.g001150.t1.1	Cre01.g001150.t1.1			KOG2652
			Cre01.g001200	#N/A	30789333	Cre01.g001200.t1.1	Cre01.g001200.t1.1	PF07714	PTHR23257:SF366,PTHR23257				GO:0004672,GO:0006468	AT3G46920.1		Protein kinase superfamily protein with octicosapeptide/Phox/Bem1p domain
			Cre01.g001250	#N/A	30788501	Cre01.g001250.t1.2	Cre01.g001250.t1.2
			Cre01.g001350	#N/A	30788846	Cre01.g001350.t1.2	Cre01.g001350.t1.2	PF00005,PF06472	PTHR11384:SF18,PTHR11384	KOG0060			GO:0005524,GO:0016887,GO:0006810,GO:0016020	AT1G54350.1		ABC transporter family protein
			Cre01.g001400	#N/A	30788589	Cre01.g001400.t1.1	Cre01.g001400.t1.1	PF01457	PTHR10942	KOG4462	3.4.24.-	K13539	GO:0004222,GO:0006508,GO:0007155,GO:0008270,GO:0016020	AT5G42620.2		metalloendopeptidases;zinc ion binding
			Cre01.g001450	#N/A	30789050	Cre01.g001450.t1.2	Cre01.g001450.t1.2
			Cre01.g001501	#N/A	30788677	Cre01.g001501.t1.1	Cre01.g001501.t1.1
			Cre01.g001550	#N/A	30789252	Cre01.g001550.t1.1	Cre01.g001550.t1.1	PF00707,PF05198	PTHR10938			K02520	GO:0003743,GO:0006413	AT2G24060.1		Translation initiation factor 3 protein
			Cre01.g001600	#N/A	30788856	Cre01.g001600.t1.2	Cre01.g001600.t1.2	PF00651	PTHR26379,PTHR26379:SF178				GO:0005515	AT5G19330.1	ARIA	ARM repeat protein interacting with ABF2
			Cre01.g001650	#N/A	30789638	Cre01.g001650.t1.2	Cre01.g001650.t1.2	PF00023	PTHR24198:SF302,PTHR24198	KOG4214			GO:0005515	AT4G19150.1		Ankyrin repeat family protein
			Cre01.g001657	#N/A	30789041	Cre01.g001657.t1.1	Cre01.g001657.t1.1
			Cre01.g001664	#N/A	30789618	Cre01.g001664.t1.1	Cre01.g001664.t1.1
			Cre01.g001671	#N/A	30789189	Cre01.g001671.t1.1	Cre01.g001671.t1.1
			Cre01.g001678	#N/A	30789137	Cre01.g001678.t1.1	Cre01.g001678.t1.1	PF00069	PTHR23257:SF367,PTHR23257	KOG0192			GO:0004672,GO:0005524,GO:0006468	AT5G57610.1		Protein kinase superfamily protein with octicosapeptide/Phox/Bem1p domain
			Cre01.g001678	#N/A	30789138	Cre01.g001678.t2.1	Cre01.g001678.t2.1	PF00069	PTHR23257:SF367,PTHR23257	KOG0192			GO:0004672,GO:0005524,GO:0006468	AT5G57610.1		Protein kinase superfamily protein with octicosapeptide/Phox/Bem1p domain
			Cre01.g001685	#N/A	30788398	Cre01.g001685.t1.1	Cre01.g001685.t1.1
			Cre01.g001700	#N/A	30789537	Cre01.g001700.t1.1	Cre01.g001700.t1.1	PF00069	PTHR23257,PTHR23257:SF367	KOG0192			GO:0004672,GO:0005524,GO:0006468	AT3G46920.1		Protein kinase superfamily protein with octicosapeptide/Phox/Bem1p domain
			Cre01.g001750	#N/A	30788712	Cre01.g001750.t1.2	Cre01.g001750.t1.2	PF05697,PF05698					GO:0006457,GO:0015031	AT5G55220.1		trigger factor type chaperone family protein
			Cre01.g001800	#N/A	30788521	Cre01.g001800.t1.1	Cre01.g001800.t1.1	PF00069	PTHR24362,PTHR24362:SF25	KOG0583	2.7.11.1	K08857	GO:0004672,GO:0005524,GO:0006468	AT3G04810.1	ATNEK2,NEK2	NIMA-related kinase 2
			Cre01.g001950	#N/A	30789205	Cre01.g001950.t1.2	Cre01.g001950.t1.2
			Cre01.g001983	#N/A	30788458	Cre01.g001983.t1.1	Cre01.g001983.t1.1
			Cre01.g001983	#N/A	30788459	Cre01.g001983.t2.1	Cre01.g001983.t2.1
			Cre01.g002050	#N/A	30789101	Cre01.g002050.t1.1	Cre01.g002050.t1.1	PF00328	PTHR11567	KOG3720			GO:0003993
			Cre01.g002100	#N/A	30788974	Cre01.g002100.t1.2	Cre01.g002100.t1.2	PF01753					GO:0008270
			Cre01.g002150	#N/A	30789448	Cre01.g002150.t1.2	Cre01.g002150.t1.2
			Cre01.g002200	#N/A	30789017	Cre01.g002200.t1.1	Cre01.g002200.t1.1	PF01192	PTHR10773	KOG3405		K03014	GO:0003677,GO:0003899,GO:0006351	AT5G51940.1	NRPB6A,NRPD6A,NRPE6A	RNA polymerase Rpb6
			Cre01.g002201	#N/A	30789199	Cre01.g002201.t1.2	Cre01.g002201.t1.2	PF04031	PTHR15002					AT5G12220.1		las1-like family protein
			Cre01.g002201	#N/A	30789200	Cre01.g002201.t2.1	Cre01.g002201.t2.1	PF04031	PTHR15002					AT5G12220.1		las1-like family protein
			Cre01.g002203	#N/A	30789466	Cre01.g002203.t1.1	Cre01.g002203.t1.1
			Cre01.g002227	#N/A	30788985	Cre01.g002227.t1.2	Cre01.g002227.t1.2
			Cre01.g002234	#N/A	30788355	Cre01.g002234.t1.1	Cre01.g002234.t1.1
			Cre01.g002234	#N/A	30788356	Cre01.g002234.t2.1	Cre01.g002234.t2.1
			Cre01.g002250	#N/A	30789180	Cre01.g002250.t1.2	Cre01.g002250.t1.2	PF00583	PTHR13355				GO:0008080,GO:0008152	AT1G26220.1		Acyl-CoA N-acyltransferases (NAT) superfamily protein
			Cre01.g002300	#N/A	30788660	Cre01.g002300.t1.2	Cre01.g002300.t1.2	PF00160	PTHR11071:SF157,PTHR11071	KOG0865	5.2.1.8	K01802	GO:0003755,GO:0006457	AT2G21130.1		Cyclophilin-like peptidyl-prolyl cis-trans isomerase family protein
			Cre01.g002350	#N/A	30789373	Cre01.g002350.t1.1	Cre01.g002350.t1.1	PF00899	PTHR10953:SF29,PTHR10953	KOG2016		K04532	GO:0003824	AT1G05180.1	AXR1	NAD(P)-binding Rossmann-fold superfamily protein
			Cre01.g002400	#N/A	30788816	Cre01.g002400.t1.1	Cre01.g002400.t1.1	PF01764	PTHR21493:SF9,PTHR21493				GO:0004806,GO:0006629	AT4G13550.1		triglyceride lipases;triglyceride lipases
			Cre01.g002451	#N/A	30789565	Cre01.g002451.t1.1	Cre01.g002451.t1.1	PF00168	PTHR10774				GO:0005515	AT5G17980.1		C2 calcium/lipid-binding plant phosphoribosyltransferase family protein
			Cre01.g002500	#N/A	30788346	Cre01.g002500.t1.2	Cre01.g002500.t1.2
			Cre01.g002550	#N/A	30789683	Cre01.g002550.t1.1	Cre01.g002550.t1.1	PF00069	PTHR24356	KOG0598			GO:0004672,GO:0005524,GO:0006468	AT1G30640.1		Protein kinase family protein
			Cre01.g002600	#N/A	30788889	Cre01.g002600.t1.2	Cre01.g002600.t1.2
			Cre01.g002650	#N/A	30789610	Cre01.g002650.t1.2	Cre01.g002650.t1.2
			Cre01.g002700	#N/A	30788992	Cre01.g002700.t1.2	Cre01.g002700.t1.2	PF00400		KOG1333
			Cre01.g002750	#N/A	30788369	Cre01.g002750.t1.2	Cre01.g002750.t1.2
			Cre01.g002750	#N/A	30788370	Cre01.g002750.t2.1	Cre01.g002750.t2.1	PF07366
			Cre01.g002787	#N/A	30789171	Cre01.g002787.t1.1	Cre01.g002787.t1.1	PF00704,PF00059,PF03762,PF00530	PTHR11177:SF44,PTHR11177	KOG2806			GO:0004553,GO:0005975,GO:0005488,GO:0030704,GO:0005044,GO:0016020	AT4G19800.1		Glycosyl hydrolase family protein with chitinase insertion domain
			Cre01.g002824	#N/A	30788543	Cre01.g002824.t1.1	Cre01.g002824.t1.1
			Cre01.g002861	#N/A	30789341	Cre01.g002861.t1.1	Cre01.g002861.t1.1		PTHR11177:SF44,PTHR11177
			Cre01.g002900	#N/A	30788964	Cre01.g002900.t1.2	Cre01.g002900.t1.2
			Cre01.g002950	#N/A	30788847	Cre01.g002950.t1.1	Cre01.g002950.t1.1	PF06677		KOG4537
			Cre01.g003000	#N/A	30789230	Cre01.g003000.t1.1	Cre01.g003000.t1.1
			Cre01.g003050	#N/A	30788616	Cre01.g003050.t1.2	Cre01.g003050.t1.2	PF04048				K06111	GO:0000145,GO:0006904,GO:0015031	AT3G10380.1	ATSEC8,SEC8	subunit of exocyst complex 8
			Cre01.g003100	#N/A	30788970	Cre01.g003100.t1.1	Cre01.g003100.t1.1	PF00226	PTHR25040,PTHR25040:SF159				GO:0031072	AT2G21510.1		DNAJ heat shock N-terminal domain-containing protein
			Cre01.g003100	#N/A	30788971	Cre01.g003100.t2.1	Cre01.g003100.t2.1	PF00226	PTHR25040,PTHR25040:SF159				GO:0031072	AT2G21510.1		DNAJ heat shock N-terminal domain-containing protein
			Cre01.g003150	#N/A	30789503	Cre01.g003150.t1.2	Cre01.g003150.t1.2
			Cre01.g003200	#N/A	30788898	Cre01.g003200.t1.2	Cre01.g003200.t1.2	PF01408	PTHR22604:SF28,PTHR22604		1.1.1.179,1.3.1.20	K00078	GO:0016491	AT4G09670.1		Oxidoreductase family protein
			Cre01.g003250	#N/A	30789549	Cre01.g003250.t1.1	Cre01.g003250.t1.1	PF07282	PTHR23257,PTHR23257:SF99
			Cre01.g003300	#N/A	30789158	Cre01.g003300.t1.2	Cre01.g003300.t1.2	PF01094
			Cre01.g003376	#N/A	30788350	Cre01.g003376.t1.1	Cre01.g003376.t1.1	PF00249,PF00226	PTHR24078:SF29,PTHR24078	KOG0724		K09522	GO:0031072	AT5G06110.1		DnaJ domain ;Myb-like DNA-binding domain
			Cre01.g003450	#N/A	30789254	Cre01.g003450.t1.1	Cre01.g003450.t1.1
			Cre01.g003450	#N/A	30789255	Cre01.g003450.t2.1	Cre01.g003450.t2.1
			Cre01.g003463	#N/A	30789210	Cre01.g003463.t1.1	Cre01.g003463.t1.1	PF01624,PF00488,PF05192,PF05188	PTHR11361:SF35,PTHR11361	KOG0219		K08735	GO:0005524,GO:0006298,GO:0030983	AT3G18524.1	ATMSH2,MSH2	MUTS homolog 2
			Cre01.g003475	#N/A	30788550	Cre01.g003475.t1.1	Cre01.g003475.t1.1	PF06742,PF06863
			Cre01.g003487	#N/A	30789160	Cre01.g003487.t1.1	Cre01.g003487.t1.1	PF09736		KOG2654		K13106		AT1G31870.1
			Cre01.g003500	#N/A	30789121	Cre01.g003500.t1.2	Cre01.g003500.t1.2							AT5G54440.1	AtTRS130,CLUB	CLUB
			Cre01.g003508	#N/A	30788305	Cre01.g003508.t1.1	Cre01.g003508.t1.1
			Cre01.g003516	#N/A	30789616	Cre01.g003516.t1.1	Cre01.g003516.t1.1
			Cre01.g003524	#N/A	30788840	Cre01.g003524.t1.1	Cre01.g003524.t1.1	PF00069	PTHR24349	KOG0032			GO:0004672,GO:0005524,GO:0006468	AT5G12180.1	CPK17	calcium-dependent protein kinase 17
			Cre01.g003532	#N/A	30788832	Cre01.g003532.t1.1	Cre01.g003532.t1.1
			Cre01.g003541	#N/A	30789437	Cre01.g003541.t1.1	Cre01.g003541.t1.1
			Cre01.g003550	#N/A	30789709	Cre01.g003550.t1.1	Cre01.g003550.t1.1	PF00581		KOG1530				AT4G27700.1		Rhodanese/Cell cycle control phosphatase superfamily protein
			Cre01.g003600	#N/A	30789710	Cre01.g003600.t1.2	Cre01.g003600.t1.2
			Cre01.g003650	#N/A	30788534	Cre01.g003650.t1.1	Cre01.g003650.t1.1
			Cre01.g003650	#N/A	30788535	Cre01.g003650.t2.1	Cre01.g003650.t2.1
			Cre01.g003700	#N/A	30788668	Cre01.g003700.t1.2	Cre01.g003700.t1.2	PF10263	PTHR23099	KOG3854
			Cre01.g003751	#N/A	30789533	Cre01.g003751.t1.1	Cre01.g003751.t1.1	PF00520,PF00027	PTHR10217:SF393,PTHR10217	KOG0500			GO:0005216,GO:0006811,GO:0016020,GO:0055085	AT5G37500.1	GORK	gated outwardly-rectifying K+ channel
			Cre01.g003800	#N/A	30788915	Cre01.g003800.t1.1	Cre01.g003800.t1.1	PF00069	PTHR23257				GO:0004672,GO:0005524,GO:0006468	AT3G06620.1		PAS domain-containing protein tyrosine kinase family protein
			Cre01.g003826	#N/A	30789703	Cre01.g003826.t1.1	Cre01.g003826.t1.1
			Cre01.g003850	#N/A	30789713	Cre01.g003850.t1.1	Cre01.g003850.t1.1	PF00067	PTHR24305	KOG0157			GO:0005506,GO:0009055,GO:0016705,GO:0020037	AT2G44890.1	CYP704A1	cytochrome P450, family 704, subfamily A, polypeptide 1
			Cre01.g003950	#N/A	30788427	Cre01.g003950.t1.1	Cre01.g003950.t1.1		PTHR10919:SF179,PTHR10919
			Cre01.g003950	#N/A	30788428	Cre01.g003950.t2.1	Cre01.g003950.t2.1		PTHR10919:SF179,PTHR10919
			Cre01.g004000	#N/A	30788914	Cre01.g004000.t1.2	Cre01.g004000.t1.2	PF08855
			Cre01.g004050	#N/A	30789672	Cre01.g004050.t1.2	Cre01.g004050.t1.2
			Cre01.g004124	#N/A	30788731	Cre01.g004124.t1.1	Cre01.g004124.t1.1		PTHR10919:SF179,PTHR10919
			Cre01.g004124	#N/A	30788732	Cre01.g004124.t2.1	Cre01.g004124.t2.1		PTHR10919:SF179,PTHR10919
			Cre01.g004157	#N/A	30789433	Cre01.g004157.t1.2	Cre01.g004157.t1.2		PTHR10919:SF179,PTHR10919
			Cre01.g004200	#N/A	30789198	Cre01.g004200.t1.2	Cre01.g004200.t1.2
			Cre01.g004250	#N/A	30788836	Cre01.g004250.t1.2	Cre01.g004250.t1.2	PF03645	PTHR21255	KOG4081		K10420
			Cre01.g004300	#N/A	30789034	Cre01.g004300.t1.2	Cre01.g004300.t1.2	PF00733	PTHR11772	KOG0571	6.3.5.4	K01953	GO:0004066,GO:0006529	AT3G47340.1	ASN1,AT-ASN1,DIN6	glutamine-dependent asparagine synthase 1
			Cre01.g004350	#N/A	30788641	Cre01.g004350.t1.2	Cre01.g004350.t1.2	PF03097	PTHR23030:SF13,PTHR23030	KOG2220		K12200		AT1G15130.1		Endosomal targeting BRO1-like domain-containing protein
			Cre01.g004400	#N/A	30788372	Cre01.g004400.t1.2	Cre01.g004400.t1.2
			Cre01.g004450	#N/A	30789152	Cre01.g004450.t1.2	Cre01.g004450.t1.2	PF07466						AT1G54520.1
			Cre01.g004500	#N/A	30789545	Cre01.g004500.t1.2	Cre01.g004500.t1.2	PF00330	PTHR11670,PTHR11670:SF16	KOG0454	4.2.1.33,4.2.1.35	K01703	GO:0008152	AT4G13430.1	ATLEUC1,IIL1	isopropyl malate isomerase large subunit 1
			Cre01.g004550	#N/A	30788925	Cre01.g004550.t1.2	Cre01.g004550.t1.2	PF00536	PTHR12587	KOG4375
			Cre01.g004600	#N/A	30789354	Cre01.g004600.t1.1	Cre01.g004600.t1.1	PF02042		KOG3866				AT5G53040.1		RWP-RK domain-containing protein
			Cre01.g004651	#N/A	30788395	Cre01.g004651.t1.1	Cre01.g004651.t1.1	PF00570	PTHR13710:SF17,PTHR13710				GO:0003676,GO:0005622,GO:0006310,GO:0008026
			Cre01.g004700	#N/A	30789464	Cre01.g004700.t1.2	Cre01.g004700.t1.2	PF03188					GO:0016021
			Cre01.g004750	#N/A	30788692	Cre01.g004750.t1.1	Cre01.g004750.t1.1							AT3G59440.1		Calcium-binding EF-hand family protein
			Cre01.g004750	#N/A	30788693	Cre01.g004750.t2.1	Cre01.g004750.t2.1							AT3G59440.1		Calcium-binding EF-hand family protein
			Cre01.g004800	#N/A	30788382	Cre01.g004800.t1.2	Cre01.g004800.t1.2
			Cre01.g004850	#N/A	30789361	Cre01.g004850.t1.1	Cre01.g004850.t1.1	PF07500,PF04851,PF08711		KOG1105			GO:0006351,GO:0003677,GO:0005524,GO:0016787,GO:0005634,GO:0030528
			Cre01.g004900	#N/A	30788980	Cre01.g004900.t1.2	Cre01.g004900.t1.2	PF01965	PTHR11019,PTHR11019:SF30
			Cre01.g004926	#N/A	30789057	Cre01.g004926.t1.1	Cre01.g004926.t1.1
			Cre01.g004950	#N/A	30788473	Cre01.g004950.t1.1	Cre01.g004950.t1.1	PF01965	PTHR11019,PTHR11019:SF30
			Cre01.g005001	#N/A	30789597	Cre01.g005001.t1.1	Cre01.g005001.t1.1							AT2G38695.1
			Cre01.g005050	#N/A	30788576	Cre01.g005050.t1.1	Cre01.g005050.t1.1	PF00839	PTHR11884				GO:0016020
			Cre01.g005100	#N/A	30789089	Cre01.g005100.t1.1	Cre01.g005100.t1.1
			Cre01.g005126	#N/A	30789217	Cre01.g005126.t1.1	Cre01.g005126.t1.1
			Cre01.g005150	#N/A	30788515	Cre01.g005150.t1.1	Cre01.g005150.t1.1	PF00266	PTHR21152,PTHR21152:SF7	KOG2862	2.6.1.44,2.6.1.45,2.6.1.51	K00830	GO:0008152	AT2G13360.1	AGT,AGT1,SGAT	alanine:glyoxylate aminotransferase
			Cre01.g005200	#N/A	30788742	Cre01.g005200.t1.1	Cre01.g005200.t1.1	PF01764	PTHR21493,PTHR21493:SF9				GO:0004806,GO:0006629	AT4G18550.1		alpha/beta-Hydrolases superfamily protein
			Cre01.g005250	#N/A	30789682	Cre01.g005250.t1.2	Cre01.g005250.t1.2	PF07282
			Cre01.g005300	#N/A	30789547	Cre01.g005300.t1.2	Cre01.g005300.t1.2
			Cre01.g005350	#N/A	30788923	Cre01.g005350.t1.2	Cre01.g005350.t1.2	PF07282
			Cre01.g005400	#N/A	30789228	Cre01.g005400.t1.1	Cre01.g005400.t1.1	PF00106	PTHR24322	KOG0725			GO:0008152,GO:0016491	AT1G54870.1		NAD(P)-binding Rossmann-fold superfamily protein
			Cre01.g005450	#N/A	30788770	Cre01.g005450.t1.2	Cre01.g005450.t1.2	PF02493	PTHR23084,PTHR23084:SF102					AT1G60890.2		Phosphatidylinositol-4-phosphate 5-kinase family protein
			Cre01.g005500	#N/A	30789372	Cre01.g005500.t1.2	Cre01.g005500.t1.2	PF02656,PF03105,PF09359	PTHR10783,PTHR10783:SF20	KOG1161
			Cre01.g005534	#N/A	30788996	Cre01.g005534.t1.2	Cre01.g005534.t1.2
			Cre01.g005543	#N/A	30789584	Cre01.g005543.t1.1	Cre01.g005543.t1.1
			Cre01.g005550	#N/A	30789161	Cre01.g005550.t1.2	Cre01.g005550.t1.2	PF00025	PTHR11711,PTHR11711:SF26	KOG0073		K07943	GO:0005525	AT2G18390.1	ARL2,ATARLC1,HAL,TTN5	ADP-ribosylation factor family protein
			Cre01.g005600	#N/A	30788623	Cre01.g005600.t1.1	Cre01.g005600.t1.1	PF00111					GO:0009055,GO:0051536
			Cre01.g005651	#N/A	30789259	Cre01.g005651.t1.1	Cre01.g005651.t1.1
			Cre01.g005701	#N/A	30788629	Cre01.g005701.t1.2	Cre01.g005701.t1.2
			Cre01.g005701	#N/A	30788630	Cre01.g005701.t2.1	Cre01.g005701.t2.1
			Cre01.g005750	#N/A	30789489	Cre01.g005750.t1.1	Cre01.g005750.t1.1		PTHR10913,PTHR10913:SF5
			Cre01.g005813	#N/A	30789701	Cre01.g005813.t1.2	Cre01.g005813.t1.2
			Cre01.g005850	#N/A	30788374	Cre01.g005850.t1.2	Cre01.g005850.t1.2	PF01923	PTHR12213		2.5.1.17	K00798	GO:0005524,GO:0008817,GO:0009236
			Cre01.g005900	#N/A	30789172	Cre01.g005900.t1.1	Cre01.g005900.t1.1	PF04379	PTHR14289:SF10,PTHR14289			K10290		AT1G06110.1	SKIP16	SKP1/ASK-interacting protein 16
			Cre01.g005950	#N/A	30788591	Cre01.g005950.t1.2	Cre01.g005950.t1.2							AT1G15140.1		FAD/NAD(P)-binding oxidoreductase
			Cre01.g006000	#N/A	30788607	Cre01.g006000.t1.1	Cre01.g006000.t1.1
			Cre01.g006050	#N/A	30789227	Cre01.g006050.t1.1	Cre01.g006050.t1.1
			Cre01.g006100	#N/A	30789633	Cre01.g006100.t1.2	Cre01.g006100.t1.2	PF00111					GO:0009055,GO:0051536
			Cre01.g006150	#N/A	30788424	Cre01.g006150.t1.1	Cre01.g006150.t1.1	PF00009,PF03144	PTHR23115:SF85,PTHR23115				GO:0003924,GO:0005525	AT1G62750.1	ATSCO1,ATSCO1/CPEF-G,SCO1	Translation elongation factor EFG/EF2 protein
			Cre01.g006202	#N/A	30789113	Cre01.g006202.t1.1	Cre01.g006202.t1.1	PF07282	PTHR23257,PTHR23257:SF99
			Cre01.g006250	#N/A	30789206	Cre01.g006250.t1.2	Cre01.g006250.t1.2		PTHR10178,PTHR10178:SF14
			Cre01.g006301	#N/A	30788976	Cre01.g006301.t1.1	Cre01.g006301.t1.1
			Cre01.g006352	#N/A	30789491	Cre01.g006352.t1.1	Cre01.g006352.t1.1
			Cre01.g006402	#N/A	30789026	Cre01.g006402.t1.1	Cre01.g006402.t1.1
			Cre01.g006450	#N/A	30788331	Cre01.g006450.t1.2	Cre01.g006450.t1.2	PF00078	PTHR19446:SF123,PTHR19446				GO:0003723,GO:0003964,GO:0006278
			Cre01.g006450	#N/A	30788330	Cre01.g006450.t2.1	Cre01.g006450.t2.1	PF00078	PTHR19446:SF123,PTHR19446				GO:0003723,GO:0003964,GO:0006278
			Cre01.g006500	#N/A	30789118	Cre01.g006500.t1.1	Cre01.g006500.t1.1
			Cre01.g006550	#N/A	30788626	Cre01.g006550.t1.1	Cre01.g006550.t1.1
			Cre01.g006576	#N/A	30789322	Cre01.g006576.t1.1	Cre01.g006576.t1.1
			Cre01.g006600	#N/A	30788808	Cre01.g006600.t1.2	Cre01.g006600.t1.2	PF00078	PTHR19446				GO:0003723,GO:0003964,GO:0006278	AT4G20520.1		RNA binding;RNA-directed DNA polymerases
			Cre01.g006614	#N/A	30789666	Cre01.g006614.t1.1	Cre01.g006614.t1.1	PF00078	PTHR19446				GO:0003723,GO:0003964,GO:0006278	AT4G20520.1		RNA binding;RNA-directed DNA polymerases
			Cre01.g006628	#N/A	30788937	Cre01.g006628.t1.1	Cre01.g006628.t1.1	PF00078	PTHR19446				GO:0003723,GO:0003964,GO:0006278
			Cre01.g006628	#N/A	30788936	Cre01.g006628.t2.1	Cre01.g006628.t2.1	PF00078	PTHR19446				GO:0003723,GO:0003964,GO:0006278
			Cre01.g006642	#N/A	30789291	Cre01.g006642.t1.1	Cre01.g006642.t1.1
			Cre01.g006656	#N/A	30789463	Cre01.g006656.t1.1	Cre01.g006656.t1.1
			Cre01.g006670	#N/A	30788720	Cre01.g006670.t1.1	Cre01.g006670.t1.1	PF00078	PTHR19446				GO:0003723,GO:0003964,GO:0006278
			Cre01.g006700	#N/A	30788354	Cre01.g006700.t1.2	Cre01.g006700.t1.2	PF00078	PTHR19446:SF34,PTHR19446				GO:0003723,GO:0003964,GO:0006278	AT4G20520.1		RNA binding;RNA-directed DNA polymerases
			Cre01.g006733	#N/A	30788415	Cre01.g006733.t1.1	Cre01.g006733.t1.1
			Cre01.g006766	#N/A	30788908	Cre01.g006766.t1.1	Cre01.g006766.t1.1	PF00078	PTHR10178,PTHR10178:SF42				GO:0003723,GO:0003964,GO:0006278
			Cre01.g006800	#N/A	30788498	Cre01.g006800.t1.1	Cre01.g006800.t1.1	PF00534,PF08288	PTHR12526,PTHR12526:SF37	KOG1111	2.4.1.198	K03857	GO:0009058,GO:0006506	AT3G45100.1	SETH2	UDP-Glycosyltransferase superfamily protein
			Cre01.g006850	#N/A	30789306	Cre01.g006850.t1.2	Cre01.g006850.t1.2
			Cre01.g006876	#N/A	30788926	Cre01.g006876.t1.1	Cre01.g006876.t1.1
			Cre01.g006900	#N/A	30789539	Cre01.g006900.t1.1	Cre01.g006900.t1.1	PF05548,PF00415	PTHR22870,PTHR22870:SF58					AT3G55580.1		Regulator of chromosome condensation (RCC1) family protein
			Cre01.g006900	#N/A	30789540	Cre01.g006900.t2.1	Cre01.g006900.t2.1	PF05548,PF00415	PTHR22870,PTHR22870:SF58					AT3G55580.1		Regulator of chromosome condensation (RCC1) family protein
			Cre01.g006950	#N/A	30788755	Cre01.g006950.t1.1	Cre01.g006950.t1.1	PF00274	PTHR11627	KOG1557	4.1.2.13	K01623	GO:0004332,GO:0006096	AT3G52930.1		Aldolase superfamily protein
			Cre01.g006950	#N/A	30788756	Cre01.g006950.t2.1	Cre01.g006950.t2.1	PF00274	PTHR11627	KOG1557	4.1.2.13	K01623	GO:0004332,GO:0006096	AT3G52930.1		Aldolase superfamily protein
			Cre01.g007000	#N/A	30789403	Cre01.g007000.t1.2	Cre01.g007000.t1.2	PF01061,PF00005	PTHR19241	KOG0061			GO:0016020,GO:0005524,GO:0016887	AT2G29940.1	ATPDR3,PDR3	pleiotropic drug resistance 3
			Cre01.g007050	#N/A	30789381	Cre01.g007050.t1.2	Cre01.g007050.t1.2	PF11267						AT3G19900.1
			Cre01.g007051	#N/A	30788581	Cre01.g007051.t1.2	Cre01.g007051.t1.2	PF00240,PF01020	PTHR10666	KOG0003		K02927	GO:0005515,GO:0003735,GO:0005840,GO:0006412	AT2G36170.1		Ubiquitin supergroup;Ribosomal protein L40e
			Cre01.g007100	#N/A	30789270	Cre01.g007100.t1.1	Cre01.g007100.t1.1
			Cre01.g007150	#N/A	30788435	Cre01.g007150.t1.1	Cre01.g007150.t1.1	PF00622,PF10607	PTHR12864,PTHR12864:SF1				GO:0005515	AT4G09340.1		SPla/RYanodine receptor (SPRY) domain-containing protein
			Cre01.g007200	#N/A	30788451	Cre01.g007200.t1.2	Cre01.g007200.t1.2	PF01529	PTHR22883	KOG1311			GO:0008270	AT3G56930.1		DHHC-type zinc finger family protein
			Cre01.g007251	#N/A	30788939	Cre01.g007251.t1.1	Cre01.g007251.t1.1
			Cre01.g007300	#N/A	30788854	Cre01.g007300.t1.2	Cre01.g007300.t1.2		PTHR15032:SF3,PTHR15032	KOG3798	3.1.4.-	K13985
			Cre01.g007350	#N/A	30789132	Cre01.g007350.t1.2	Cre01.g007350.t1.2		PTHR10825:SF30,PTHR10825	KOG4172				AT5G12310.1		RING/U-box superfamily protein
			Cre01.g007400	#N/A	30788701	Cre01.g007400.t1.1	Cre01.g007400.t1.1
			Cre01.g007450	#N/A	30789627	Cre01.g007450.t1.1	Cre01.g007450.t1.1	PF00153	PTHR24089:SF152,PTHR24089					AT1G34065.1	SAMC2	S-adenosylmethionine carrier 2
			Cre01.g007500	#N/A	30788467	Cre01.g007500.t1.1	Cre01.g007500.t1.1	PF00474	PTHR11819,PTHR11819:SF4	KOG2349			GO:0005215,GO:0006810,GO:0016020,GO:0055085
			Cre01.g007500	#N/A	30788466	Cre01.g007500.t2.1	Cre01.g007500.t2.1	PF00474	PTHR11819,PTHR11819:SF4	KOG2349			GO:0005215,GO:0006810,GO:0016020,GO:0055085
			Cre01.g007550	#N/A	30789269	Cre01.g007550.t1.1	Cre01.g007550.t1.1	PF05686	PTHR12203					AT3G61270.1		Arabidopsis thaliana protein of unknown function (DUF821)
			Cre01.g007600	#N/A	30789013	Cre01.g007600.t1.1	Cre01.g007600.t1.1	PF02431					GO:0016872,GO:0042398	AT1G53520.1		Chalcone-flavanone isomerase family protein
			Cre01.g007600	#N/A	30789014	Cre01.g007600.t2.1	Cre01.g007600.t2.1	PF02431					GO:0016872,GO:0042398	AT1G53520.1		Chalcone-flavanone isomerase family protein
			Cre01.g007651	#N/A	30789092	Cre01.g007651.t1.1	Cre01.g007651.t1.1	PF01142	PTHR13326				GO:0001522,GO:0003723,GO:0009451,GO:0009982	AT3G04820.1		Pseudouridine synthase family protein
			Cre01.g007700	#N/A	30788708	Cre01.g007700.t1.1	Cre01.g007700.t1.1	PF02789,PF00883	PTHR11963:SF3,PTHR11963	KOG2597	3.4.11.1	K01255	GO:0004177,GO:0005737,GO:0008235,GO:0019538,GO:0030145,GO:0005622,GO:0006508	AT2G24200.1		Cytosol aminopeptidase family protein
			Cre01.g007737	#N/A	30789483	Cre01.g007737.t1.1	Cre01.g007737.t1.1	PF03092	PTHR24003:SF331,PTHR24003					AT2G32040.1		Major facilitator superfamily protein
			Cre01.g007774	#N/A	30788308	Cre01.g007774.t1.1	Cre01.g007774.t1.1		PTHR12183	KOG2985				AT5G19080.1		RING/U-box superfamily protein
			Cre01.g007811	#N/A	30788920	Cre01.g007811.t1.1	Cre01.g007811.t1.1
			Cre01.g007850	#N/A	30789496	Cre01.g007850.t1.2	Cre01.g007850.t1.2							AT5G47570.1
			Cre01.g007901	#N/A	30789348	Cre01.g007901.t1.1	Cre01.g007901.t1.1	PF01554	PTHR11206:SF43,PTHR11206				GO:0006855,GO:0015238,GO:0015297,GO:0016020,GO:0055085	AT1G15160.1		MATE efflux family protein
			Cre01.g007901	#N/A	30789350	Cre01.g007901.t2.1	Cre01.g007901.t2.1		PTHR11206:SF43,PTHR11206				GO:0006855,GO:0015238,GO:0015297,GO:0016020,GO:0055085	AT4G21910.1		MATE efflux family protein
			Cre01.g007901	#N/A	30789349	Cre01.g007901.t3.1	Cre01.g007901.t3.1	PF01554	PTHR11206:SF43,PTHR11206				GO:0006855,GO:0015238,GO:0015297,GO:0016020,GO:0055085	AT1G15160.1		MATE efflux family protein
			Cre01.g007950	#N/A	30788527	Cre01.g007950.t1.1	Cre01.g007950.t1.1	PF00067		KOG0156			GO:0005506,GO:0009055,GO:0016705,GO:0020037	AT1G05160.1	ATKAO1,CYP88A3,KAO1	cytochrome P450, family 88, subfamily A, polypeptide 3
			Cre01.g008000	#N/A	30789116	Cre01.g008000.t1.2	Cre01.g008000.t1.2	PF10469,PF00013	PTHR13360,PTHR13360:SF1	KOG2814			GO:0003723	AT3G16230.1		Predicted eukaryotic LigT
			Cre01.g008051	#N/A	30788373	Cre01.g008051.t1.1	Cre01.g008051.t1.1		PTHR12270,PTHR12270:SF7
			Cre01.g008100	#N/A	30788343	Cre01.g008100.t1.2	Cre01.g008100.t1.2		PTHR14493,PTHR14493:SF7					AT2G41900.1		CCCH-type zinc finger protein with ARM repeat domain
			Cre01.g008150	#N/A	30788997	Cre01.g008150.t1.1	Cre01.g008150.t1.1	PF00069,PF00481	PTHR13832				GO:0004672,GO:0005524,GO:0006468,GO:0003824	AT3G63340.1		Protein phosphatase 2C family protein
			Cre01.g008200	#N/A	30789615	Cre01.g008200.t1.1	Cre01.g008200.t1.1
			Cre01.g008250	#N/A	30788880	Cre01.g008250.t1.2	Cre01.g008250.t1.2
			Cre01.g008300	#N/A	30788557	Cre01.g008300.t1.1	Cre01.g008300.t1.1
			Cre01.g008300	#N/A	30788558	Cre01.g008300.t2.1	Cre01.g008300.t2.1
			Cre01.g008350	#N/A	30788804	Cre01.g008350.t1.1	Cre01.g008350.t1.1
			Cre01.g008450	#N/A	30789330	Cre01.g008450.t1.2	Cre01.g008450.t1.2	PF03800	PTHR21650	KOG4438		K11548	GO:0000775,GO:0007067	AT1G61000.1
			Cre01.g008500	#N/A	30788844	Cre01.g008500.t1.2	Cre01.g008500.t1.2	PF00023	PTHR24198	KOG4412			GO:0005515	AT3G04710.3		ankyrin repeat family protein
			Cre01.g008550	#N/A	30789131	Cre01.g008550.t1.1	Cre01.g008550.t1.1	PF00069	PTHR24058,PTHR24058:SF21	KOG0667			GO:0004672,GO:0005524,GO:0006468	AT1G73450.1		Protein kinase superfamily protein
			Cre01.g008600	#N/A	30788723	Cre01.g008600.t1.1	Cre01.g008600.t1.1	PF11051					GO:0006486
			Cre01.g008650	#N/A	30789679	Cre01.g008650.t1.1	Cre01.g008650.t1.1	PF00069,PF07714	PTHR24055,PTHR24055:SF170	KOG0594			GO:0004672,GO:0005524,GO:0006468	AT1G66750.1	AT;CDKD;2,CAK4,CAK4AT,CDKD1;2,CDKD;2	CDK-activating kinase 4
			Cre01.g008700	#N/A	30789278	Cre01.g008700.t1.2	Cre01.g008700.t1.2
			Cre01.g008750	#N/A	30788843	Cre01.g008750.t1.2	Cre01.g008750.t1.2
			Cre01.g008800	#N/A	30789249	Cre01.g008800.t1.1	Cre01.g008800.t1.1
			Cre01.g008850	#N/A	30788656	Cre01.g008850.t1.1	Cre01.g008850.t1.1							AT5G47490.1		RGPR-related
			Cre01.g008891	#N/A	30789555	Cre01.g008891.t1.2	Cre01.g008891.t1.2	PF00581	PTHR11364					AT1G79230.1	ATMST1,ATRDH1,MST1,ST1,STR1	mercaptopyruvate sulfurtransferase 1
			Cre01.g008900	#N/A	30788764	Cre01.g008900.t1.2	Cre01.g008900.t1.2		PTHR10366,PTHR10366:SF113
			Cre01.g008950	#N/A	30788348	Cre01.g008950.t1.2	Cre01.g008950.t1.2
			Cre01.g008950	#N/A	30788349	Cre01.g008950.t2.1	Cre01.g008950.t2.1
			Cre01.g008976	#N/A	30788945	Cre01.g008976.t1.1	Cre01.g008976.t1.1
			Cre01.g009000	#N/A	30789176	Cre01.g009000.t1.1	Cre01.g009000.t1.1		PTHR10366,PTHR10366:SF113
			Cre01.g009025	#N/A	30788450	Cre01.g009025.t1.1	Cre01.g009025.t1.1
			Cre01.g009050	#N/A	30789438	Cre01.g009050.t1.2	Cre01.g009050.t1.2
			Cre01.g009101	#N/A	30788801	Cre01.g009101.t1.1	Cre01.g009101.t1.1		PTHR22937:SF16,PTHR22937					AT5G43420.1		RING/U-box superfamily protein
			Cre01.g009150	#N/A	30789211	Cre01.g009150.t1.1	Cre01.g009150.t1.1
			Cre01.g009200	#N/A	30788564	Cre01.g009200.t1.2	Cre01.g009200.t1.2							AT2G39760.1	ATBPM3,BPM3	BTB/POZ/MATH-domains containing protein
			Cre01.g009250	#N/A	30789357	Cre01.g009250.t1.1	Cre01.g009250.t1.1	PF02518,PF00204,PF00521	PTHR10169:SF19,PTHR10169	KOG0355	5.99.1.3	K03164	GO:0005524,GO:0003677,GO:0003918,GO:0005694,GO:0006265	AT3G23890.1	ATTOPII,TOPII	topoisomerase II
			Cre01.g009300	#N/A	30788407	Cre01.g009300.t1.1	Cre01.g009300.t1.1	PF02383,PF00397	PTHR11200:SF41,PTHR11200				GO:0042578,GO:0005515	AT3G59770.3	SAC9	sacI homology domain-containing protein / WW domain-containing protein
			Cre01.g009325	#N/A	30789175	Cre01.g009325.t1.1	Cre01.g009325.t1.1	PF05721
			Cre01.g009350	#N/A	30789624	Cre01.g009350.t1.2	Cre01.g009350.t1.2	PF04371			3.5.3.12	K10536		AT5G08170.1	ATAIH,EMB1873	porphyromonas-type peptidyl-arginine deiminase family protein
			Cre01.g009400	#N/A	30788857	Cre01.g009400.t1.2	Cre01.g009400.t1.2	PF00474	PTHR11819,PTHR11819:SF4			K14387	GO:0005215,GO:0006810,GO:0016020,GO:0055085
			Cre01.g009450	#N/A	30789455	Cre01.g009450.t1.1	Cre01.g009450.t1.1	PF00226	PTHR24077:SF69,PTHR24077				GO:0031072	AT4G39960.1		Molecular chaperone Hsp40/DnaJ family protein
			Cre01.g009500	#N/A	30788572	Cre01.g009500.t1.2	Cre01.g009500.t1.2	PF00069,PF00036	PTHR24347,PTHR24347:SF13	KOG0032			GO:0004672,GO:0005524,GO:0006468	AT3G10660.1	ATCPK2,CPK2	calmodulin-domain protein kinase cdpk isoform 2
			Cre01.g009550	#N/A	30789319	Cre01.g009550.t1.1	Cre01.g009550.t1.1	PF00583					GO:0008080,GO:0008152
			Cre01.g009575	#N/A	30789505	Cre01.g009575.t1.1	Cre01.g009575.t1.1	PF00847	PTHR11795:SF332,PTHR11795	KOG4462		K09284	GO:0003700,GO:0006355	AT5G57390.1	AIL5,CHO1,EMK	AINTEGUMENTA-like 5
			Cre01.g009601	#N/A	30788827	Cre01.g009601.t1.1	Cre01.g009601.t1.1
			Cre01.g009601	#N/A	30788828	Cre01.g009601.t2.1	Cre01.g009601.t2.1
			Cre01.g009650	#N/A	30789409	Cre01.g009650.t1.2	Cre01.g009650.t1.2	PF00847	PTHR11795:SF332,PTHR11795			K09284	GO:0003700,GO:0006355	AT5G57390.1	AIL5,CHO1,EMK	AINTEGUMENTA-like 5
			Cre01.g009676	#N/A	30788834	Cre01.g009676.t1.1	Cre01.g009676.t1.1
			Cre01.g009700	#N/A	30789602	Cre01.g009700.t1.1	Cre01.g009700.t1.1	PF07228	PTHR12320	KOG1379			GO:0003824	AT2G30170.1		Protein phosphatase 2C family protein
			Cre01.g009731	#N/A	30788922	Cre01.g009731.t1.2	Cre01.g009731.t1.2
			Cre01.g009765	#N/A	30789154	Cre01.g009765.t1.1	Cre01.g009765.t1.1
			Cre01.g009800	#N/A	30788413	Cre01.g009800.t1.2	Cre01.g009800.t1.2
			Cre01.g009850	#N/A	30789332	Cre01.g009850.t1.2	Cre01.g009850.t1.2
			Cre01.g009900	#N/A	30789040	Cre01.g009900.t1.1	Cre01.g009900.t1.1	PF00226	PTHR25040:SF173,PTHR25040				GO:0031072	AT2G42750.1		DNAJ heat shock N-terminal domain-containing protein
			Cre01.g009950	#N/A	30788800	Cre01.g009950.t1.2	Cre01.g009950.t1.2	PF03587	PTHR12636	KOG3073		K14568		AT3G57000.1		nucleolar essential protein-related
			Cre01.g010000	#N/A	30789588	Cre01.g010000.t1.2	Cre01.g010000.t1.2	PF00069	PTHR24055,PTHR24055:SF69	KOG0660	2.7.11.24	K04371	GO:0004672,GO:0005524,GO:0006468	AT4G01370.1	ATMPK4,MPK4	MAP kinase 4
			Cre01.g010050	#N/A	30789392	Cre01.g010050.t1.1	Cre01.g010050.t1.1
			Cre01.g010100	#N/A	30788763	Cre01.g010100.t1.2	Cre01.g010100.t1.2	PF00583					GO:0008080,GO:0008152
			Cre01.g010150	#N/A	30788562	Cre01.g010150.t1.2	Cre01.g010150.t1.2		PTHR11089:SF31,PTHR11089					AT2G41670.1		P-loop containing nucleoside triphosphate hydrolases superfamily protein
			Cre01.g010201	#N/A	30789308	Cre01.g010201.t1.1	Cre01.g010201.t1.1			KOG2992
			Cre01.g010250	#N/A	30789535	Cre01.g010250.t1.1	Cre01.g010250.t1.1	PF07228	PTHR12320	KOG1379			GO:0003824	AT2G30170.1		Protein phosphatase 2C family protein
			Cre01.g010296	#N/A	30788367	Cre01.g010296.t1.1	Cre01.g010296.t1.1
			Cre01.g010300	#N/A	30789395	Cre01.g010300.t1.2	Cre01.g010300.t1.2
			Cre01.g010350	#N/A	30789328	Cre01.g010350.t1.2	Cre01.g010350.t1.2	PF03099	PTHR10993	KOG0325	2.3.1.181	K03801	GO:0003824,GO:0006464	AT1G04640.1	LIP2	lipoyltransferase 2
			Cre01.g010400	#N/A	30788845	Cre01.g010400.t1.2	Cre01.g010400.t1.2
			Cre01.g010450	#N/A	30789512	Cre01.g010450.t1.2	Cre01.g010450.t1.2	PF00397					GO:0005515
			Cre01.g010500	#N/A	30789054	Cre01.g010500.t1.2	Cre01.g010500.t1.2	PF10247		KOG4096				AT3G07910.1
			Cre01.g010550	#N/A	30788358	Cre01.g010550.t1.1	Cre01.g010550.t1.1	PF00561	PTHR10992,PTHR10992:SF98	KOG4178				AT3G51000.1		alpha/beta-Hydrolases superfamily protein
			Cre01.g010550	#N/A	30788359	Cre01.g010550.t2.1	Cre01.g010550.t2.1	PF00561	PTHR10992,PTHR10992:SF98	KOG4178				AT3G51000.1		alpha/beta-Hydrolases superfamily protein
			Cre01.g010650	#N/A	30789303	Cre01.g010650.t1.2	Cre01.g010650.t1.2
			Cre01.g010700	#N/A	30788492	Cre01.g010700.t1.2	Cre01.g010700.t1.2	PF00804,PF05739	PTHR19957,PTHR19957:SF11	KOG0811		K08488	GO:0016020,GO:0005515	AT5G46860.1	ATSYP22,ATVAM3,SGR3,SYP22,VAM3	Syntaxin/t-SNARE family protein
			Cre01.g010750	#N/A	30789445	Cre01.g010750.t1.2	Cre01.g010750.t1.2	PF01342					GO:0003677,GO:0005634
			Cre01.g010800	#N/A	30788513	Cre01.g010800.t1.1	Cre01.g010800.t1.1	PF00443	PTHR24619:SF184,PTHR24619				GO:0004221,GO:0006511	AT3G14400.1	UBP25	ubiquitin-specific protease 25
			Cre01.g010816	#N/A	30789606	Cre01.g010816.t1.1	Cre01.g010816.t1.1
			Cre01.g010832	#N/A	30788783	Cre01.g010832.t1.1	Cre01.g010832.t1.1	PF00112,PF08246	PTHR12411:SF160,PTHR12411	KOG1543			GO:0006508,GO:0008234	AT3G45310.1		Cysteine proteinases superfamily protein
			Cre01.g010848	#N/A	30789480	Cre01.g010848.t1.1	Cre01.g010848.t1.1	PF01168	PTHR10146	KOG3157		K06997		AT1G11930.2		Predicted pyridoxal phosphate-dependent enzyme, YBL036C type
			Cre01.g010864	#N/A	30788710	Cre01.g010864.t1.1	Cre01.g010864.t1.1	PF03462,PF00472	PTHR11075,PTHR11075:SF38	KOG2726			GO:0005737,GO:0006415,GO:0016149,GO:0003747	AT5G36170.1	ATPRFB,HCF109	high chlorophyll fluorescent 109
			Cre01.g010880	#N/A	30789173	Cre01.g010880.t1.1	Cre01.g010880.t1.1	PF00400,PF03451	PTHR13720,PTHR13720:SF6	KOG2106
			Cre01.g010900	#N/A	30788366	Cre01.g010900.t1.2	Cre01.g010900.t1.2	PF00044,PF02800	PTHR10836	KOG0657	1.2.1.13	K05298	GO:0016620,GO:0055114	AT1G42970.1	GAPB	glyceraldehyde-3-phosphate dehydrogenase B subunit
			Cre01.g010950	#N/A	30789578	Cre01.g010950.t1.1	Cre01.g010950.t1.1	PF00023	PTHR24128	KOG4412			GO:0005515	AT2G28840.1	XBAT31	XB3 ortholog 1 in Arabidopsis thaliana
			Cre01.g011000	#N/A	30788989	Cre01.g011000.t1.2	Cre01.g011000.t1.2	PF01159,PF03868	PTHR10715	KOG1694		K02934	GO:0003735,GO:0005622,GO:0005840,GO:0006412	AT1G74050.1		Ribosomal protein L6 family protein
			Cre01.g011050	#N/A	30788777	Cre01.g011050.t1.2	Cre01.g011050.t1.2
			Cre01.g011100	#N/A	30789592	Cre01.g011100.t1.2	Cre01.g011100.t1.2	PF00432	PTHR11764,PTHR11764:SF3	KOG0497	5.4.99.8	K01853	GO:0003824	AT2G07050.1	CAS1	cycloartenol synthase 1
			Cre01.g011100	#N/A	30789593	Cre01.g011100.t2.1	Cre01.g011100.t2.1	PF00432	PTHR11764,PTHR11764:SF3	KOG0497	5.4.99.8	K01853	GO:0003824	AT2G07050.1	CAS1	cycloartenol synthase 1
			Cre01.g011150	#N/A	30789340	Cre01.g011150.t1.1	Cre01.g011150.t1.1	PF00010					GO:0006355,GO:0030528
			Cre01.g011200	#N/A	30788549	Cre01.g011200.t1.2	Cre01.g011200.t1.2	PF04658	PTHR12228			K03132	GO:0005669,GO:0006367,GO:0016251	AT1G55300.1	TAF7	TBP-associated factor 7
			Cre01.g011250	#N/A	30789305	Cre01.g011250.t1.1	Cre01.g011250.t1.1
			Cre01.g011300	#N/A	30788722	Cre01.g011300.t1.1	Cre01.g011300.t1.1	PF00450	PTHR11802	KOG1282	3.4.16.-	K09645	GO:0004185,GO:0006508	AT1G15000.1	scpl50	serine carboxypeptidase-like 50
			Cre01.g011350	#N/A	30788728	Cre01.g011350.t1.2	Cre01.g011350.t1.2	PF04719	PTHR13218,PTHR13218:SF8	KOG3219		K03135	GO:0003702,GO:0005634,GO:0006367	AT4G20280.1	TAF11	TBP-associated factor 11
			Cre01.g011376	#N/A	30789560	Cre01.g011376.t1.1	Cre01.g011376.t1.1
			Cre01.g011400	#N/A	30788948	Cre01.g011400.t1.1	Cre01.g011400.t1.1
			Cre01.g011400	#N/A	30788949	Cre01.g011400.t2.1	Cre01.g011400.t2.1
			Cre01.g011450	#N/A	30789065	Cre01.g011450.t1.1	Cre01.g011450.t1.1
			Cre01.g011500	#N/A	30789063	Cre01.g011500.t1.2	Cre01.g011500.t1.2	PF01398	PTHR10410:SF5,PTHR10410	KOG1555		K03030	GO:0005515	AT5G23540.1		Mov34/MPN/PAD-1 family protein
			Cre01.g011550	#N/A	30789659	Cre01.g011550.t1.1	Cre01.g011550.t1.1
			Cre01.g011600	#N/A	30788874	Cre01.g011600.t1.2	Cre01.g011600.t1.2	PF01344	PTHR23244,PTHR23244:SF126	KOG4693			GO:0005515	AT3G05420.2	ACBP4	acyl-CoA binding protein 4
			Cre01.g011630	#N/A	30788672	Cre01.g011630.t1.1	Cre01.g011630.t1.1	PF00188	PTHR10334,PTHR10334:SF7	KOG3017				AT4G33730.1		CAP (Cysteine-rich secretory proteins, Antigen 5, and Pathogenesis-related 1 protein) superfamily protein
			Cre01.g011630	#N/A	30788673	Cre01.g011630.t2.1	Cre01.g011630.t2.1	PF00188	PTHR10334	KOG3017				AT4G33730.1		CAP (Cysteine-rich secretory proteins, Antigen 5, and Pathogenesis-related 1 protein) superfamily protein
			Cre01.g011660	#N/A	30788397	Cre01.g011660.t1.1	Cre01.g011660.t1.1	PF00188	PTHR10334					AT4G33730.1		CAP (Cysteine-rich secretory proteins, Antigen 5, and Pathogenesis-related 1 protein) superfamily protein
			Cre01.g011660	#N/A	30788396	Cre01.g011660.t2.1	Cre01.g011660.t2.1	PF00188	PTHR10334					AT4G33730.1		CAP (Cysteine-rich secretory proteins, Antigen 5, and Pathogenesis-related 1 protein) superfamily protein
			Cre01.g011750	#N/A	30789182	Cre01.g011750.t1.1	Cre01.g011750.t1.1	PF10239		KOG4744
			Cre01.g011800	#N/A	30788849	Cre01.g011800.t1.1	Cre01.g011800.t1.1	PF00069	PTHR23257:SF290,PTHR23257	KOG0198			GO:0004672,GO:0005524,GO:0006468	AT5G49470.3		PAS domain-containing protein tyrosine kinase family protein
			Cre01.g011850	#N/A	30789652	Cre01.g011850.t1.1	Cre01.g011850.t1.1	PF00069	PTHR23257:SF290,PTHR23257				GO:0004672,GO:0005524,GO:0006468	AT5G58950.1		Protein kinase superfamily protein
			Cre01.g011850	#N/A	30789651	Cre01.g011850.t2.1	Cre01.g011850.t2.1	PF00069	PTHR23257:SF290,PTHR23257				GO:0004672,GO:0005524,GO:0006468	AT5G58950.1		Protein kinase superfamily protein
			Cre01.g011901	#N/A	30788706	Cre01.g011901.t1.1	Cre01.g011901.t1.1	PF00884	PTHR10342:SF2,PTHR10342		3.1.6.14	K01137	GO:0008152,GO:0008484
			Cre01.g011950	#N/A	30789478	Cre01.g011950.t1.1	Cre01.g011950.t1.1
			Cre01.g012000	#N/A	30788820	Cre01.g012000.t1.1	Cre01.g012000.t1.1
			Cre01.g012050	#N/A	30789443	Cre01.g012050.t1.2	Cre01.g012050.t1.2	PF01226					GO:0005215,GO:0006810,GO:0016020
			Cre01.g012100	#N/A	30789345	Cre01.g012100.t1.1	Cre01.g012100.t1.1	PF00884	PTHR10342:SF2,PTHR10342	KOG3867	3.1.6.-	K14607	GO:0008152,GO:0008484
			Cre01.g012126	#N/A	30788978	Cre01.g012126.t1.2	Cre01.g012126.t1.2	PF00884	PTHR10342:SF2,PTHR10342				GO:0008152,GO:0008484
			Cre01.g012126	#N/A	30788979	Cre01.g012126.t2.1	Cre01.g012126.t2.1	PF00884	PTHR10342:SF2,PTHR10342				GO:0008152,GO:0008484
			Cre01.g012150	#N/A	30789458	Cre01.g012150.t1.2	Cre01.g012150.t1.2	PF00254,PF01625	PTHR10173:SF6,PTHR10173	KOG1635	1.8.4.11	K07304	GO:0006457,GO:0016671,GO:0019538,GO:0055114	AT5G07470.1	ATMSRA3,PMSR3	peptidemethionine sulfoxide reductase 3
			Cre01.g012175	#N/A	30788502	Cre01.g012175.t1.1	Cre01.g012175.t1.1
			Cre01.g012200	#N/A	30789471	Cre01.g012200.t1.1	Cre01.g012200.t1.1	PF03110,PF00651	PTHR24412				GO:0003677,GO:0005634,GO:0005515	AT3G60030.1	SPL12	squamosa promoter-binding protein-like 12
			Cre01.g012200	#N/A	30789472	Cre01.g012200.t2.1	Cre01.g012200.t2.1	PF03110,PF00651	PTHR24412				GO:0003677,GO:0005634,GO:0005515	AT3G60030.1	SPL12	squamosa promoter-binding protein-like 12
			Cre01.g012222	#N/A	30788381	Cre01.g012222.t1.1	Cre01.g012222.t1.1
			Cre01.g012244	#N/A	30789045	Cre01.g012244.t1.2	Cre01.g012244.t1.2
			Cre01.g012300	#N/A	30789699	Cre01.g012300.t1.1	Cre01.g012300.t1.1							AT5G24460.1
			Cre01.g012350	#N/A	30788907	Cre01.g012350.t1.2	Cre01.g012350.t1.2	PF04931	PTHR13213				GO:0003677,GO:0003887,GO:0006351	AT5G64420.1		DNA polymerase V family
			Cre01.g012400	#N/A	30789509	Cre01.g012400.t1.2	Cre01.g012400.t1.2	PF00892	PTHR22911:SF6,PTHR22911	KOG4510			GO:0016020	AT2G05755.1		Nodulin MtN21 /EamA-like transporter family protein
			Cre01.g012450	#N/A	30788678	Cre01.g012450.t1.1	Cre01.g012450.t1.1	PF00632,PF06012,PF06025	PTHR11254,PTHR11254:SF124	KOG0940	6.3.2.19	K10592	GO:0005622,GO:0006464,GO:0016881	AT1G55860.2	UPL1	ubiquitin-protein ligase 1
			Cre01.g012500	#N/A	30789473	Cre01.g012500.t1.2	Cre01.g012500.t1.2	PF03208	PTHR19317	KOG3142				AT5G01640.1	PRA1.B5	prenylated RAB acceptor 1.B5
			Cre01.g012550	#N/A	30789213	Cre01.g012550.t1.1	Cre01.g012550.t1.1
			Cre01.g012600	#N/A	30789204	Cre01.g012600.t1.1	Cre01.g012600.t1.1	PF02878,PF02879,PF00408,PF02880	PTHR22573:SF2,PTHR22573	KOG1220	5.4.2.2	K01835	GO:0005975,GO:0016868
			Cre01.g012650	#N/A	30788583	Cre01.g012650.t1.1	Cre01.g012650.t1.1	PF00023,PF00520	PTHR10217:SF394,PTHR10217	KOG4214			GO:0005515,GO:0005216,GO:0006811,GO:0016020,GO:0055085	AT5G37500.1	GORK	gated outwardly-rectifying K+ channel
			Cre01.g012700	#N/A	30789326	Cre01.g012700.t1.2	Cre01.g012700.t1.2	PF00023,PF00520,PF00027	PTHR10217:SF394,PTHR10217	KOG4412			GO:0005515,GO:0005216,GO:0006811,GO:0016020,GO:0055085	AT5G37500.1	GORK	gated outwardly-rectifying K+ channel
			Cre01.g012750	#N/A	30788518	Cre01.g012750.t1.1	Cre01.g012750.t1.1	PF00023,PF00520	PTHR10217:SF394,PTHR10217	KOG4214			GO:0005515,GO:0005216,GO:0006811,GO:0016020,GO:0055085	AT5G37500.1	GORK	gated outwardly-rectifying K+ channel
			Cre01.g012800	#N/A	30788664	Cre01.g012800.t1.1	Cre01.g012800.t1.1
			Cre01.g012800	#N/A	30788665	Cre01.g012800.t2.1	Cre01.g012800.t2.1
			Cre01.g012850	#N/A	30789525	Cre01.g012850.t1.2	Cre01.g012850.t1.2	PF00520	PTHR10217:SF394,PTHR10217	KOG4412			GO:0005216,GO:0006811,GO:0016020,GO:0055085	AT5G37500.1	GORK	gated outwardly-rectifying K+ channel
			Cre01.g012900	#N/A	30789257	Cre01.g012900.t1.1	Cre01.g012900.t1.1	PF01842					GO:0008152,GO:0016597	AT1G69040.2	ACR4	ACT domain repeat 4
			Cre01.g012950	#N/A	30788635	Cre01.g012950.t1.1	Cre01.g012950.t1.1	PF00069,PF07714	PTHR23257,PTHR23257:SF277				GO:0004672,GO:0005524,GO:0006468	AT3G63260.1	ATMRK1	Protein kinase superfamily protein
			Cre01.g012950	#N/A	30788636	Cre01.g012950.t2.1	Cre01.g012950.t2.1	PF00069,PF07714	PTHR23257,PTHR23257:SF277				GO:0004672,GO:0005524,GO:0006468	AT3G63260.1	ATMRK1	Protein kinase superfamily protein
			Cre01.g013000	#N/A	30789159	Cre01.g013000.t1.1	Cre01.g013000.t1.1		PTHR11276:SF17,PTHR11276
			Cre01.g013050	#N/A	30788332	Cre01.g013050.t1.1	Cre01.g013050.t1.1	PF01344	PTHR23244				GO:0005515	AT1G18610.1		Galactose oxidase/kelch repeat superfamily protein
			Cre01.g013100	#N/A	30788340	Cre01.g013100.t1.1	Cre01.g013100.t1.1	PF00188	PTHR10334,PTHR10334:SF7	KOG3017				AT2G14610.1	ATPR1,PR 1,PR1	pathogenesis-related gene 1
			Cre01.g013150	#N/A	30789271	Cre01.g013150.t1.2	Cre01.g013150.t1.2	PF05899				K06995		AT4G10300.1		RmlC-like cupins superfamily protein
			Cre01.g013200	#N/A	30788810	Cre01.g013200.t1.2	Cre01.g013200.t1.2
			Cre01.g013250	#N/A	30789654	Cre01.g013250.t1.1	Cre01.g013250.t1.1		PTHR14269:SF4,PTHR14269					AT3G45740.1		hydrolase family protein / HAD-superfamily protein
			Cre01.g013300	#N/A	30789429	Cre01.g013300.t1.1	Cre01.g013300.t1.1	PF00089	PTHR22939,PTHR22939:SF1	KOG1320			GO:0004252,GO:0006508	AT5G36950.1	DegP10	DegP protease 10
			Cre01.g013350	#N/A	30788698	Cre01.g013350.t1.2	Cre01.g013350.t1.2
			Cre01.g013400	#N/A	30789667	Cre01.g013400.t1.1	Cre01.g013400.t1.1	PF10510	PTHR21072					AT3G07180.1		GPI transamidase component PIG-S-related
			Cre01.g013450	#N/A	30788871	Cre01.g013450.t1.2	Cre01.g013450.t1.2
			Cre01.g013500	#N/A	30788587	Cre01.g013500.t1.2	Cre01.g013500.t1.2	PF01814
			Cre01.g013500	#N/A	30788588	Cre01.g013500.t2.1	Cre01.g013500.t2.1	PF01814
			Cre01.g013550	#N/A	30789047	Cre01.g013550.t1.1	Cre01.g013550.t1.1
			Cre01.g013600	#N/A	30788716	Cre01.g013600.t1.1	Cre01.g013600.t1.1							AT4G24680.1	MOS1	modifier of snc1
			Cre01.g013650	#N/A	30789705	Cre01.g013650.t1.1	Cre01.g013650.t1.1			KOG2318				AT1G18950.1		DDT domain superfamily
			Cre01.g013700	#N/A	30789286	Cre01.g013700.t1.2	Cre01.g013700.t1.2	PF01459	PTHR11743:SF24,PTHR11743	KOG3126			GO:0005741,GO:0006820,GO:0008308,GO:0044070,GO:0055085	AT5G57490.1	ATVDAC4,VDAC4	voltage dependent anion channel 4
			Cre01.g013700	#N/A	30789285	Cre01.g013700.t2.1	Cre01.g013700.t2.1	PF01459	PTHR11743:SF24,PTHR11743	KOG3126			GO:0005741,GO:0006820,GO:0008308,GO:0044070,GO:0055085	AT5G57490.1	ATVDAC4,VDAC4	voltage dependent anion channel 4
			Cre01.g013750	#N/A	30788486	Cre01.g013750.t1.1	Cre01.g013750.t1.1
			Cre01.g013769	#N/A	30789120	Cre01.g013769.t1.2	Cre01.g013769.t1.2
			Cre01.g013800	#N/A	30788303	Cre01.g013800.t1.1	Cre01.g013800.t1.1	PF00098	PTHR23002			K09250	GO:0003676,GO:0008270	AT3G43590.1		zinc knuckle (CCHC-type) family protein
			Cre01.g013801	#N/A	30789663	Cre01.g013801.t1.2	Cre01.g013801.t1.2					K09834		AT4G32770.1	ATSDX1,VTE1	tocopherol cyclase, chloroplast / vitamin E deficient 1 (VTE1) / sucrose export defective 1 (SXD1)
			Cre01.g013850	#N/A	30788429	Cre01.g013850.t1.1	Cre01.g013850.t1.1
			Cre01.g013900	#N/A	30789358	Cre01.g013900.t1.1	Cre01.g013900.t1.1
			Cre01.g013900	#N/A	30789359	Cre01.g013900.t2.1	Cre01.g013900.t2.1
			Cre01.g014000	#N/A	30788951	Cre01.g014000.t1.2	Cre01.g014000.t1.2
			Cre01.g014050	#N/A	30789551	Cre01.g014050.t1.2	Cre01.g014050.t1.2		PTHR12681	KOG1763				AT2G20280.1		Zinc finger C-x8-C-x5-C-x3-H type family protein
			Cre01.g014100	#N/A	30789129	Cre01.g014100.t1.2	Cre01.g014100.t1.2	PF10294
			Cre01.g014150	#N/A	30788361	Cre01.g014150.t1.2	Cre01.g014150.t1.2	PF01554	PTHR11206:SF38,PTHR11206	KOG1347			GO:0006855,GO:0015238,GO:0015297,GO:0016020,GO:0055085	AT5G52450.1		MATE efflux family protein
			Cre01.g014250	#N/A	30789140	Cre01.g014250.t1.1	Cre01.g014250.t1.1
			Cre01.g014300	#N/A	30788795	Cre01.g014300.t1.1	Cre01.g014300.t1.1
			Cre01.g014300	#N/A	30788796	Cre01.g014300.t2.1	Cre01.g014300.t2.1
			Cre01.g014350	#N/A	30789386	Cre01.g014350.t1.2	Cre01.g014350.t1.2	PF08534	PTHR10430	KOG0541			GO:0016491	AT3G52960.1		Thioredoxin superfamily protein
			Cre01.g014400	#N/A	30788833	Cre01.g014400.t1.1	Cre01.g014400.t1.1
			Cre01.g014450	#N/A	30789546	Cre01.g014450.t1.1	Cre01.g014450.t1.1
			Cre01.g014500	#N/A	30788315	Cre01.g014500.t1.1	Cre01.g014500.t1.1	PF07714	PTHR23257	KOG0192	2.7.10.2	K08896	GO:0004672,GO:0006468	AT1G16270.1		Protein kinase superfamily protein with octicosapeptide/Phox/Bem1p domain
			Cre01.g014600	#N/A	30788522	Cre01.g014600.t1.2	Cre01.g014600.t1.2	PF00069	PTHR11909:SF18,PTHR11909				GO:0004672,GO:0005524,GO:0006468	AT5G43320.1	ckl8	casein kinase I-like 8
			Cre01.g014650	#N/A	30789287	Cre01.g014650.t1.2	Cre01.g014650.t1.2	PF03171	PTHR10869				GO:0016491	AT3G06300.1	AT-P4H-2	P4H isoform 2
			Cre01.g014700	#N/A	30788530	Cre01.g014700.t1.2	Cre01.g014700.t1.2
			Cre01.g014751	#N/A	30789344	Cre01.g014751.t1.1	Cre01.g014751.t1.1
			Cre01.g014800	#N/A	30789416	Cre01.g014800.t1.1	Cre01.g014800.t1.1	PF00488	PTHR11361:SF14,PTHR11361			K07456	GO:0005524,GO:0006298,GO:0030983,GO:0003684,GO:0045005	AT1G65070.2		DNA mismatch repair protein MutS, type 2
			Cre01.g014850	#N/A	30788873	Cre01.g014850.t1.2	Cre01.g014850.t1.2	PF03556	PTHR12281	KOG3077				AT3G12760.1
			Cre01.g014900	#N/A	30789027	Cre01.g014900.t1.1	Cre01.g014900.t1.1
			Cre01.g014950	#N/A	30788387	Cre01.g014950.t1.1	Cre01.g014950.t1.1
			Cre01.g014950	#N/A	30788388	Cre01.g014950.t2.1	Cre01.g014950.t2.1
			Cre01.g015000	#N/A	30788858	Cre01.g015000.t1.2	Cre01.g015000.t1.2	PF00696	PTHR24802:SF2,PTHR24802		2.7.2.-,2.7.2.8	K00930	GO:0008652	AT3G57560.1	NAGK	N-acetyl-l-glutamate kinase
			Cre01.g015050	#N/A	30789617	Cre01.g015050.t1.1	Cre01.g015050.t1.1			KOG2117
			Cre01.g015100	#N/A	30789011	Cre01.g015100.t1.1	Cre01.g015100.t1.1	PF07282	PTHR23257,PTHR23257:SF99
			Cre01.g015103	#N/A	30789441	Cre01.g015103.t1.2	Cre01.g015103.t1.2	PF00211	PTHR11017				GO:0009190,GO:0016849,GO:0035556
			Cre01.g015150	#N/A	30788714	Cre01.g015150.t1.2	Cre01.g015150.t1.2
			Cre01.g015200	#N/A	30789453	Cre01.g015200.t1.1	Cre01.g015200.t1.1	PF00233,PF03924	PTHR11347:SF75,PTHR11347				GO:0004114,GO:0007165
			Cre01.g015250	#N/A	30788505	Cre01.g015250.t1.1	Cre01.g015250.t1.1	PF00136,PF03104	PTHR10322,PTHR10322:SF11	KOG0969	2.7.7.7	K02327	GO:0000166,GO:0003677,GO:0003887,GO:0006260	AT5G63960.1	EMB2780	DNA binding;nucleotide binding;nucleic acid binding;DNA-directed DNA polymerases;DNA-directed DNA polymerases
			Cre01.g015300	#N/A	30789353	Cre01.g015300.t1.1	Cre01.g015300.t1.1
			Cre01.g015350	#N/A	30789577	Cre01.g015350.t1.1	Cre01.g015350.t1.1	PF00106	PTHR24316:SF100,PTHR24316	KOG1208	1.3.1.33	K00218	GO:0008152,GO:0016491	AT5G54190.1	PORA	protochlorophyllide oxidoreductase A
			Cre01.g015400	#N/A	30789002	Cre01.g015400.t1.2	Cre01.g015400.t1.2							AT1G63610.2
			Cre01.g015451	#N/A	30788927	Cre01.g015451.t1.1	Cre01.g015451.t1.1
			Cre01.g015500	#N/A	30789428	Cre01.g015500.t1.2	Cre01.g015500.t1.2	PF00168	PTHR16122				GO:0005515	AT4G34150.1		Calcium-dependent lipid-binding (CaLB domain) family protein
			Cre01.g015550	#N/A	30788865	Cre01.g015550.t1.1	Cre01.g015550.t1.1	PF03328					GO:0006725,GO:0016830	AT4G10750.1		Phosphoenolpyruvate carboxylase family protein
			Cre01.g015600	#N/A	30789658	Cre01.g015600.t1.1	Cre01.g015600.t1.1	PF02985	PTHR23346	KOG1242			GO:0005515	AT1G64790.1	ILA	ILITYHIA
			Cre01.g015650	#N/A	30789100	Cre01.g015650.t1.2	Cre01.g015650.t1.2
			Cre01.g015700	#N/A	30788444	Cre01.g015700.t1.2	Cre01.g015700.t1.2		PTHR12176	KOG1271				AT3G60910.1		S-adenosyl-L-methionine-dependent methyltransferases superfamily protein
			Cre01.g015750	#N/A	30789262	Cre01.g015750.t1.2	Cre01.g015750.t1.2	PF07978	PTHR21017:SF1,PTHR21017	KOG2883
			Cre01.g015950	#N/A	30789043	Cre01.g015950.t1.2	Cre01.g015950.t1.2	PF01300	PTHR17490	KOG3051		K07566		AT3G01920.1		DHBP synthase RibB-like alpha/beta domain
			Cre01.g016001	#N/A	30788417	Cre01.g016001.t1.1	Cre01.g016001.t1.1
			Cre01.g016050	#N/A	30789071	Cre01.g016050.t1.2	Cre01.g016050.t1.2	PF10598,PF12134,PF08084,PF08083,PF10596,PF08082,PF10597,PF01398	PTHR11140	KOG1795		K12856	GO:0000398,GO:0005681,GO:0005515	AT1G80070.1	EMB14,EMB177,EMB33,SUS2	Pre-mRNA-processing-splicing factor
			Cre01.g016100	#N/A	30788464	Cre01.g016100.t1.1	Cre01.g016100.t1.1
			Cre01.g016150	#N/A	30789476	Cre01.g016150.t1.2	Cre01.g016150.t1.2	PF03747
			Cre01.g016200	#N/A	30788540	Cre01.g016200.t1.1	Cre01.g016200.t1.1	PF03094				K08472	GO:0008219,GO:0016021	AT1G61560.2	ATMLO6,MLO6	Seven transmembrane MLO family protein
			Cre01.g016250	#N/A	30789408	Cre01.g016250.t1.1	Cre01.g016250.t1.1	PF03094					GO:0008219,GO:0016021	AT2G39200.1	ATMLO12,MLO12	Seven transmembrane MLO family protein
			Cre01.g016300	#N/A	30788707	Cre01.g016300.t1.1	Cre01.g016300.t1.1		PTHR10891					AT1G76650.1	CML38	calmodulin-like 38
			Cre01.g016350	#N/A	30789601	Cre01.g016350.t1.1	Cre01.g016350.t1.1
			Cre01.g016400	#N/A	30789164	Cre01.g016400.t1.1	Cre01.g016400.t1.1
			Cre01.g016450	#N/A	30789187	Cre01.g016450.t1.1	Cre01.g016450.t1.1	PF00856	PTHR12197:SF79,PTHR12197			K11426	GO:0005515	AT2G17900.1	SDG37	SET domain group 37
			Cre01.g016500	#N/A	30788602	Cre01.g016500.t1.1	Cre01.g016500.t1.1
			Cre01.g016514	#N/A	30788603	Cre01.g016514.t1.1	Cre01.g016514.t1.1	PF07992,PF02852,PF00070	PTHR22912:SF49,PTHR22912	KOG1335	1.8.1.4	K00382	GO:0005737,GO:0016491,GO:0045454,GO:0050660,GO:0055114	AT3G16950.2	LPD1,ptlpd1	lipoamide dehydrogenase 1
			Cre01.g016528	#N/A	30788695	Cre01.g016528.t1.1	Cre01.g016528.t1.1	PF00596	PTHR10640,PTHR10640:SF2	KOG2631	3.1.3.77	K09880	GO:0046872	AT5G53850.2		haloacid dehalogenase-like hydrolase family protein
			Cre01.g016542	#N/A	30789468	Cre01.g016542.t1.1	Cre01.g016542.t1.1		PTHR10108,PTHR10108:SF383
			Cre01.g016542	#N/A	30789469	Cre01.g016542.t2.1	Cre01.g016542.t2.1
			Cre01.g016556	#N/A	30788998	Cre01.g016556.t1.1	Cre01.g016556.t1.1	PF01214	PTHR11740	KOG3092		K03115	GO:0005956,GO:0019887	AT4G17640.1	CKB2	casein kinase II beta chain 2
			Cre01.g016570	#N/A	30788791	Cre01.g016570.t1.1	Cre01.g016570.t1.1	PF00069	PTHR26266,PTHR26266:SF61	KOG0198			GO:0004672,GO:0005524,GO:0006468	AT3G13530.1	MAP3KE1,MAPKKK7	mitogen-activated protein kinase kinase kinase 7
			Cre01.g016600	#N/A	30789407	Cre01.g016600.t1.2	Cre01.g016600.t1.2					K03542		AT1G44575.1	NPQ4,PSBS	Chlorophyll A-B binding family protein
			Cre01.g016651	#N/A	30789289	Cre01.g016651.t1.1	Cre01.g016651.t1.1
			Cre01.g016700	#N/A	30788503	Cre01.g016700.t1.1	Cre01.g016700.t1.1
			Cre01.g016750	#N/A	30788600	Cre01.g016750.t1.2	Cre01.g016750.t1.2					K03542		AT1G44575.1	NPQ4,PSBS	Chlorophyll A-B binding family protein
			Cre01.g016800	#N/A	30789219	Cre01.g016800.t1.1	Cre01.g016800.t1.1	PF04564	PTHR19851,PTHR19851:SF5				GO:0000151,GO:0004842,GO:0016567	AT5G01830.1		ARM repeat superfamily protein
			Cre01.g016850	#N/A	30788882	Cre01.g016850.t1.2	Cre01.g016850.t1.2	PF04419						AT2G23090.1		Uncharacterised protein family SERF
			Cre01.g016900	#N/A	30788326	Cre01.g016900.t1.2	Cre01.g016900.t1.2
			Cre01.g016950	#N/A	30788753	Cre01.g016950.t1.2	Cre01.g016950.t1.2	PF01239	PTHR11129:SF1,PTHR11129	KOG0530	2.5.1.58,2.5.1.59	K05955	GO:0008318,GO:0018342	AT3G59380.1	ATFTA,FTA,PFT/PGGT-IALPHA,PLP	farnesyltransferase A
			Cre01.g017050	#N/A	30789681	Cre01.g017050.t1.2	Cre01.g017050.t1.2	PF00153	PTHR24089	KOG0756				AT5G01340.1		Mitochondrial substrate carrier family protein
			Cre01.g017100	#N/A	30789605	Cre01.g017100.t1.1	Cre01.g017100.t1.1		PTHR22753:SF5,PTHR22753					AT1G54570.1		Esterase/lipase/thioesterase family protein
			Cre01.g017150	#N/A	30788977	Cre01.g017150.t1.1	Cre01.g017150.t1.1
			Cre01.g017200	#N/A	30789044	Cre01.g017200.t1.2	Cre01.g017200.t1.2	PF07719,PF00254	PTHR10516:SF27,PTHR10516	KOG0543			GO:0006457	AT3G54010.1	DEI1,PAS1	FKBP-type peptidyl-prolyl cis-trans isomerase family protein
			Cre01.g017250	#N/A	30788434	Cre01.g017250.t1.2	Cre01.g017250.t1.2
			Cre01.g017300	#N/A	30788961	Cre01.g017300.t1.2	Cre01.g017300.t1.2
			Cre01.g017350	#N/A	30789562	Cre01.g017350.t1.1	Cre01.g017350.t1.1		PTHR13271,PTHR13271:SF7					AT1G24610.1		Rubisco methyltransferase family protein
			Cre01.g017400	#N/A	30788724	Cre01.g017400.t1.1	Cre01.g017400.t1.1
			Cre01.g017400	#N/A	30788725	Cre01.g017400.t2.1	Cre01.g017400.t2.1
			Cre01.g017450	#N/A	30788627	Cre01.g017450.t1.1	Cre01.g017450.t1.1	PF04042,PF08418	PTHR23061,PTHR23061:SF12			K02321	GO:0003677,GO:0003887,GO:0006260	AT1G67630.1	POLA2	DNA polymerase alpha 2
			Cre01.g017500	#N/A	30788622	Cre01.g017500.t1.2	Cre01.g017500.t1.2	PF01172,PF09377	PTHR10927	KOG2917		K14574	GO:0042254,GO:0045727	AT1G43860.1		sequence-specific DNA binding transcription factors
			Cre01.g017550	#N/A	30789280	Cre01.g017550.t1.1	Cre01.g017550.t1.1	PF00560	PTHR23155,PTHR23155:SF80	KOG4237			GO:0005515	AT4G36180.1		Leucine-rich receptor-like protein kinase family protein
			Cre01.g017600	#N/A	30788432	Cre01.g017600.t1.1	Cre01.g017600.t1.1	PF01011
			Cre01.g017600	#N/A	30788433	Cre01.g017600.t2.1	Cre01.g017600.t2.1	PF01011
			Cre01.g017650	#N/A	30789685	Cre01.g017650.t1.2	Cre01.g017650.t1.2
			Cre01.g017650	#N/A	30789686	Cre01.g017650.t2.1	Cre01.g017650.t2.1
			Cre01.g017701	#N/A	30788975	Cre01.g017701.t1.1	Cre01.g017701.t1.1	PF03372,PF00078	PTHR13078,PTHR13078:SF14	KOG1995			GO:0003723,GO:0003964,GO:0006278
			Cre01.g017750	#N/A	30788953	Cre01.g017750.t1.1	Cre01.g017750.t1.1
			Cre01.g017750	#N/A	30788954	Cre01.g017750.t2.1	Cre01.g017750.t2.1
			Cre01.g017850	#N/A	30788430	Cre01.g017850.t1.2	Cre01.g017850.t1.2
			Cre01.g017900	#N/A	30788647	Cre01.g017900.t1.1	Cre01.g017900.t1.1	PF01011
			Cre01.g017951	#N/A	30789190	Cre01.g017951.t1.1	Cre01.g017951.t1.1	PF00560	PTHR23155,PTHR23155:SF80	KOG4579			GO:0005515	AT4G36180.1		Leucine-rich receptor-like protein kinase family protein
			Cre01.g018000	#N/A	30788815	Cre01.g018000.t1.1	Cre01.g018000.t1.1	PF01096	PTHR11239:SF3,PTHR11239	KOG2907	2.7.7.6	K03000	GO:0003676,GO:0006351,GO:0008270	AT3G25940.1		TFIIB zinc-binding protein
			Cre01.g018050	#N/A	30789413	Cre01.g018050.t1.2	Cre01.g018050.t1.2							AT5G13390.1	NEF1	no exine formation 1
			Cre01.g018075	#N/A	30789670	Cre01.g018075.t1.1	Cre01.g018075.t1.1
			Cre01.g018100	#N/A	30788878	Cre01.g018100.t1.2	Cre01.g018100.t1.2	PF00782	PTHR10159,PTHR10159:SF97				GO:0006470,GO:0008138	AT2G35680.1		Phosphotyrosine protein phosphatases superfamily protein
			Cre01.g018150	#N/A	30789548	Cre01.g018150.t1.2	Cre01.g018150.t1.2
			Cre01.g018184	#N/A	30789125	Cre01.g018184.t1.2	Cre01.g018184.t1.2
			Cre01.g018200	#N/A	30788680	Cre01.g018200.t1.1	Cre01.g018200.t1.1							AT2G27980.1		Acyl-CoA N-acyltransferase with RING/FYVE/PHD-type zinc finger domain
			Cre01.g018350	#N/A	30789648	Cre01.g018350.t1.2	Cre01.g018350.t1.2
			Cre01.g018400	#N/A	30789631	Cre01.g018400.t1.1	Cre01.g018400.t1.1	PF05770	PTHR14217		2.7.1.134,2.7.1.159	K00913	GO:0000287,GO:0005524,GO:0005622,GO:0032957,GO:0035300,GO:0047325	AT4G33770.1		Inositol 1,3,4-trisphosphate 5/6-kinase family protein
			Cre01.g018450	#N/A	30788798	Cre01.g018450.t1.1	Cre01.g018450.t1.1
			Cre01.g018500	#N/A	30788456	Cre01.g018500.t1.1	Cre01.g018500.t1.1	PF01648	PTHR12215,PTHR12215:SF3				GO:0000287,GO:0008897,GO:0009059	AT2G02770.1		4\'-phosphopantetheinyl transferase superfamily
			Cre01.g018550	#N/A	30788894	Cre01.g018550.t1.1	Cre01.g018550.t1.1	PF00211	PTHR11017				GO:0009190,GO:0016849,GO:0035556
			Cre01.g018600	#N/A	30789093	Cre01.g018600.t1.2	Cre01.g018600.t1.2	PF05529	PTHR14955,PTHR14955:SF5				GO:0005783,GO:0006886,GO:0016021
			Cre01.g018700	#N/A	30789442	Cre01.g018700.t1.1	Cre01.g018700.t1.1
			Cre01.g018750	#N/A	30788809	Cre01.g018750.t1.2	Cre01.g018750.t1.2
			Cre01.g018800	#N/A	30788470	Cre01.g018800.t1.2	Cre01.g018800.t1.2	PF00119	PTHR11410		3.6.3.14	K02126	GO:0015078,GO:0015986,GO:0045263	AT2G07741.1		ATPase, F0 complex, subunit A protein
			Cre01.g018850	#N/A	30788935	Cre01.g018850.t1.2	Cre01.g018850.t1.2	PF03372	PTHR12121	KOG0620				AT3G18500.2		DNAse I-like superfamily protein
			Cre01.g018900	#N/A	30788653	Cre01.g018900.t1.2	Cre01.g018900.t1.2	PF05773,PF01485	PTHR11685,PTHR11685:SF61	KOG1814	6.3.2.19	K11971	GO:0005515,GO:0008270	AT1G32340.1	NHL8	NDR1/HIN1-like 8
			Cre01.g018950	#N/A	30789081	Cre01.g018950.t1.2	Cre01.g018950.t1.2	PF01916	PTHR11703	KOG2924	2.5.1.46	K00809	GO:0008612	AT5G05920.1	DHS,EDA22	deoxyhypusine synthase
			Cre01.g019000	#N/A	30788697	Cre01.g019000.t1.2	Cre01.g019000.t1.2	PF06094						AT2G24390.1		AIG2-like (avirulence induced gene) family protein
			Cre01.g019051	#N/A	30789688	Cre01.g019051.t1.1	Cre01.g019051.t1.1
			Cre01.g019100	#N/A	30789233	Cre01.g019100.t1.2	Cre01.g019100.t1.2	PF02826,PF00389	PTHR10996,PTHR10996:SF46	KOG0069			GO:0016616,GO:0048037,GO:0008152,GO:0051287	AT3G19480.1		D-3-phosphoglycerate dehydrogenase
			Cre01.g019150	#N/A	30789490	Cre01.g019150.t1.2	Cre01.g019150.t1.2	PF04130	PTHR19302,PTHR19302:SF10	KOG2065			GO:0000226,GO:0000922,GO:0005815	AT3G53760.1	ATGCP4,GCP4	GAMMA-TUBULIN COMPLEX PROTEIN 4
			Cre01.g019200	#N/A	30788766	Cre01.g019200.t1.1	Cre01.g019200.t1.1	PF05997	PTHR13026				GO:0006364,GO:0030688	AT5G20600.1
			Cre01.g019250	#N/A	30789511	Cre01.g019250.t1.2	Cre01.g019250.t1.2	PF01370	PTHR10366,PTHR10366:SF35	KOG1429	5.1.3.-,5.1.3.18	K10046	GO:0003824,GO:0044237,GO:0050662	AT5G28840.1	GME	GDP-D-mannose 3\',5\'-epimerase
			Cre01.g019300	#N/A	30788570	Cre01.g019300.t1.1	Cre01.g019300.t1.1	PF00211	PTHR11017				GO:0009190,GO:0016849,GO:0035556
			Cre01.g019400	#N/A	30788453	Cre01.g019400.t1.2	Cre01.g019400.t1.2
			Cre01.g019450	#N/A	30789098	Cre01.g019450.t1.1	Cre01.g019450.t1.1	PF00179	PTHR24067:SF32,PTHR24067	KOG0424			GO:0016881	AT3G57870.1	AHUS5,ATSCE1,EMB1637,SCE1,SCE1A	sumo conjugation enzyme 1
			Cre01.g019450	#N/A	30789099	Cre01.g019450.t2.1	Cre01.g019450.t2.1	PF00179	PTHR24067:SF32,PTHR24067	KOG0424			GO:0016881	AT3G57870.1	AHUS5,ATSCE1,EMB1637,SCE1,SCE1A	sumo conjugation enzyme 1
			Cre01.g019500	#N/A	30789678	Cre01.g019500.t1.2	Cre01.g019500.t1.2	PF00400	PTHR22847					AT5G08390.1		Transducin/WD40 repeat-like superfamily protein
			Cre01.g019550	#N/A	30788957	Cre01.g019550.t1.2	Cre01.g019550.t1.2	PF00023	PTHR24158,PTHR24158:SF306				GO:0005515	AT5G07270.1	XBAT33	XB3 ortholog 3 in Arabidopsis thaliana
			Cre01.g019600	#N/A	30789323	Cre01.g019600.t1.2	Cre01.g019600.t1.2							AT5G62140.1
			Cre01.g019650	#N/A	30788353	Cre01.g019650.t1.1	Cre01.g019650.t1.1
			Cre01.g019700	#N/A	30788351	Cre01.g019700.t1.2	Cre01.g019700.t1.2		PTHR12271,PTHR12271:SF13					AT3G45750.1		Nucleotidyltransferase family protein
			Cre01.g019750	#N/A	30789216	Cre01.g019750.t1.1	Cre01.g019750.t1.1	PF02518,PF09239					GO:0005524,GO:0003677,GO:0003918,GO:0005694,GO:0006265	AT3G20780.1	ATTOP6B,BIN3,HYP6,RHL3,TOP6B	topoisomerase 6 subunit B
			Cre01.g019850	#N/A	30788646	Cre01.g019850.t1.1	Cre01.g019850.t1.1	PF01434,PF06480,PF00004	PTHR23076:SF11,PTHR23076	KOG0731	3.4.24.-	K08956	GO:0004222,GO:0005524,GO:0006508,GO:0008270,GO:0016021	AT1G07510.1	ftsh10	FTSH protease 10
			Cre01.g019900	#N/A	30789234	Cre01.g019900.t1.2	Cre01.g019900.t1.2
			Cre01.g019950	#N/A	30788320	Cre01.g019950.t1.2	Cre01.g019950.t1.2	PF00226,PF01556	PTHR24077:SF88,PTHR24077			K09510	GO:0031072,GO:0006457,GO:0051082	AT2G20560.1		DNAJ heat shock family protein
			Cre01.g020000	#N/A	30789165	Cre01.g020000.t1.1	Cre01.g020000.t1.1
			Cre01.g020050	#N/A	30788910	Cre01.g020050.t1.1	Cre01.g020050.t1.1			KOG1003
			Cre01.g020100	#N/A	30789706	Cre01.g020100.t1.1	Cre01.g020100.t1.1
			Cre01.g020141	#N/A	30788780	Cre01.g020141.t1.1	Cre01.g020141.t1.1
			Cre01.g020182	#N/A	30788489	Cre01.g020182.t1.1	Cre01.g020182.t1.1
			Cre01.g020223	#N/A	30789524	Cre01.g020223.t1.1	Cre01.g020223.t1.1	PF10415,PF00206	PTHR11444:SF1,PTHR11444	KOG1317	4.2.1.2	K01679	GO:0006099,GO:0016829	AT5G50950.2	FUM2	FUMARASE 2
			Cre01.g020264	#N/A	30788893	Cre01.g020264.t1.1	Cre01.g020264.t1.1	PF04111	PTHR12768,PTHR12768:SF4	KOG2751		K08334	GO:0006914	AT3G61710.1	ATATG6,AtBECLIN1,ATG6,BECLIN1	AUTOPHAGY 6
			Cre01.g020305	#N/A	30789711	Cre01.g020305.t1.1	Cre01.g020305.t1.1	PF05328					GO:0005506,GO:0005740,GO:0006099,GO:0016021,GO:0020037
			Cre01.g020350	#N/A	30789107	Cre01.g020350.t1.2	Cre01.g020350.t1.2	PF01127	PTHR10978	KOG0449			GO:0016627
			Cre01.g020400	#N/A	30788449	Cre01.g020400.t1.2	Cre01.g020400.t1.2	PF00400	PTHR22848	KOG0275		K13111		AT1G73720.1	SMU1	transducin family protein / WD-40 repeat family protein
			Cre01.g020450	#N/A	30788892	Cre01.g020450.t1.2	Cre01.g020450.t1.2
			Cre01.g020500	#N/A	30789382	Cre01.g020500.t1.2	Cre01.g020500.t1.2
			Cre01.g020575	#N/A	30788784	Cre01.g020575.t1.1	Cre01.g020575.t1.1
			Cre01.g020650	#N/A	30789192	Cre01.g020650.t1.1	Cre01.g020650.t1.1
			Cre01.g020701	#N/A	30788582	Cre01.g020701.t1.1	Cre01.g020701.t1.1
			Cre01.g020750	#N/A	30788860	Cre01.g020750.t1.2	Cre01.g020750.t1.2
			Cre01.g020800	#N/A	30789329	Cre01.g020800.t1.2	Cre01.g020800.t1.2
			Cre01.g020850	#N/A	30789623	Cre01.g020850.t1.1	Cre01.g020850.t1.1	PF07714,PF00211	PTHR11920				GO:0004672,GO:0006468,GO:0009190,GO:0016849,GO:0035556
			Cre01.g020887	#N/A	30788799	Cre01.g020887.t1.2	Cre01.g020887.t1.2
			Cre01.g020918	#N/A	30789146	Cre01.g020918.t1.1	Cre01.g020918.t1.1	PF00675,PF08367,PF05193	PTHR11851:SF68,PTHR11851	KOG2019		K06972	GO:0004222,GO:0006508,GO:0008237,GO:0008270	AT3G19170.1	ATPREP1,ATZNMP,PREP1	presequence protease 1
			Cre01.g020950	#N/A	30788544	Cre01.g020950.t1.2	Cre01.g020950.t1.2	PF04939	PTHR17602	KOG1765			GO:0005634,GO:0042254	AT2G37990.1		ribosome biogenesis regulatory protein (RRS1) family protein
			Cre01.g021000	#N/A	30789576	Cre01.g021000.t1.1	Cre01.g021000.t1.1	PF06320		KOG3390				AT2G30330.1		GCN5L1 family protein
			Cre01.g021050	#N/A	30788341	Cre01.g021050.t1.2	Cre01.g021050.t1.2	PF02466	PTHR14110	KOG3225			GO:0005743,GO:0008565,GO:0015031	AT3G10110.1	MEE67	Mitochondrial import inner membrane translocase subunit Tim17/Tim22/Tim23 family protein
			Cre01.g021100	#N/A	30788984	Cre01.g021100.t1.2	Cre01.g021100.t1.2
			Cre01.g021150	#N/A	30789613	Cre01.g021150.t1.1	Cre01.g021150.t1.1	PF05958	PTHR11061				GO:0006396,GO:0008173	AT3G21300.1		RNA methyltransferase family protein
			Cre01.g021150	#N/A	30789614	Cre01.g021150.t2.1	Cre01.g021150.t2.1	PF05958	PTHR11061				GO:0006396,GO:0008173	AT3G21300.1		RNA methyltransferase family protein
			Cre01.g021200	#N/A	30788817	Cre01.g021200.t1.2	Cre01.g021200.t1.2		PTHR22844:SF64,PTHR22844					AT5G45360.1		F-box family protein
			Cre01.g021251	#N/A	30789389	Cre01.g021251.t1.1	Cre01.g021251.t1.1	PF00206	PTHR11444,PTHR11444:SF3	KOG1316	4.3.2.1	K01755	GO:0004056,GO:0042450	AT5G10920.1		L-Aspartase-like family protein
			Cre01.g021300	#N/A	30789362	Cre01.g021300.t1.2	Cre01.g021300.t1.2
			Cre01.g021350	#N/A	30788551	Cre01.g021350.t1.2	Cre01.g021350.t1.2
			Cre01.g021400	#N/A	30789181	Cre01.g021400.t1.2	Cre01.g021400.t1.2	PF12542,PF10197	PTHR16196	KOG3869				AT2G44200.1		CBF1-interacting co-repressor CIR, N-terminal;Pre-mRNA splicing factor
			Cre01.g021450	#N/A	30788532	Cre01.g021450.t1.1	Cre01.g021450.t1.1	PF07719,PF00515	PTHR23083,PTHR23083:SF96	KOG1126			GO:0005515	AT4G37460.1	SRFR1	Tetratricopeptide repeat (TPR)-like superfamily protein
			Cre01.g021450	#N/A	30788531	Cre01.g021450.t2.1	Cre01.g021450.t2.1	PF07719,PF00515	PTHR23083,PTHR23083:SF96	KOG1126			GO:0005515	AT4G37460.1	SRFR1	Tetratricopeptide repeat (TPR)-like superfamily protein
			Cre01.g021450	#N/A	30788533	Cre01.g021450.t3.1	Cre01.g021450.t3.1	PF07719,PF00515	PTHR23083,PTHR23083:SF96	KOG1126			GO:0005515	AT4G37460.1	SRFR1	Tetratricopeptide repeat (TPR)-like superfamily protein
			Cre01.g021500	#N/A	30789611	Cre01.g021500.t1.1	Cre01.g021500.t1.1	PF04515	PTHR12385,PTHR12385:SF22	KOG1362				AT3G15380.1		Plasma-membrane choline transporter family protein
			Cre01.g021550	#N/A	30789004	Cre01.g021550.t1.1	Cre01.g021550.t1.1		PTHR12298,PTHR12298:SF13
			Cre01.g021600	#N/A	30789366	Cre01.g021600.t1.2	Cre01.g021600.t1.2	PF00271,PF00397,PF00270	PTHR24031:SF50,PTHR24031	KOG0331			GO:0003676,GO:0004386,GO:0005524,GO:0005515,GO:0008026	AT3G01540.2	ATDRH1,DRH1	DEAD box RNA helicase 1
			Cre01.g021650	#N/A	30788814	Cre01.g021650.t1.2	Cre01.g021650.t1.2
			Cre01.g021700	#N/A	30788554	Cre01.g021700.t1.1	Cre01.g021700.t1.1	PF00211	PTHR11920				GO:0009190,GO:0016849,GO:0035556
			Cre01.g021750	#N/A	30789360	Cre01.g021750.t1.2	Cre01.g021750.t1.2	PF07818	PTHR13464	KOG2959				AT1G29220.1		transcriptional regulator family protein
			Cre01.g021800	#N/A	30788452	Cre01.g021800.t1.2	Cre01.g021800.t1.2	PF00856					GO:0005515
			Cre01.g021850	#N/A	30789544	Cre01.g021850.t1.1	Cre01.g021850.t1.1	PF00271,PF00929,PF00270	PTHR24031,PTHR24031:SF174		3.6.4.12	K03655	GO:0003676,GO:0004386,GO:0005524,GO:0008026	AT2G01440.1		DEAD/DEAH box RNA helicase family protein
			Cre01.g021900	#N/A	30788930	Cre01.g021900.t1.1	Cre01.g021900.t1.1		PTHR11142				GO:0001522,GO:0003723,GO:0009451,GO:0009982	AT5G35400.1		Pseudouridine synthase family protein
			Cre01.g021950	#N/A	30789436	Cre01.g021950.t1.1	Cre01.g021950.t1.1	PF08393	PTHR10676,PTHR10676:SF136
			Cre01.g022000	#N/A	30788870	Cre01.g022000.t1.1	Cre01.g022000.t1.1	PF00004	PTHR23074,PTHR23074:SF17	KOG0740			GO:0005524	AT3G27120.1		P-loop containing nucleoside triphosphate hydrolases superfamily protein
			Cre01.g022050	#N/A	30789406	Cre01.g022050.t1.2	Cre01.g022050.t1.2
			Cre01.g022100	#N/A	30788568	Cre01.g022100.t1.2	Cre01.g022100.t1.2	PF00632	PTHR11254,PTHR11254:SF143				GO:0005622,GO:0006464,GO:0016881	AT4G12570.1	UPL5	ubiquitin protein ligase 5
			Cre01.g022150	#N/A	30789036	Cre01.g022150.t1.1	Cre01.g022150.t1.1	PF00520	PTHR11537,PTHR11537:SF97				GO:0005216,GO:0006811,GO:0016020,GO:0055085
			Cre01.g022200	#N/A	30789423	Cre01.g022200.t1.2	Cre01.g022200.t1.2
			Cre01.g022250	#N/A	30789331	Cre01.g022250.t1.1	Cre01.g022250.t1.1	PF00297	PTHR11229	KOG3141			GO:0003735,GO:0005622,GO:0005840,GO:0006412	AT3G17465.1	RPL3P	ribosomal protein L3 plastid
			Cre01.g022283	#N/A	30789126	Cre01.g022283.t1.1	Cre01.g022283.t1.1
			Cre01.g022283	#N/A	30789127	Cre01.g022283.t2.1	Cre01.g022283.t2.1
			Cre01.g022350	#N/A	30788877	Cre01.g022350.t1.2	Cre01.g022350.t1.2	PF00271,PF00270	PTHR24031,PTHR24031:SF20	KOG0347			GO:0003676,GO:0004386,GO:0005524,GO:0008026	AT3G16840.1		P-loop containing nucleoside triphosphate hydrolases superfamily protein
			Cre01.g022400	#N/A	30789279	Cre01.g022400.t1.1	Cre01.g022400.t1.1	PF00226					GO:0031072	AT3G58020.1		Chaperone DnaJ-domain superfamily protein
			Cre01.g022450	#N/A	30788644	Cre01.g022450.t1.1	Cre01.g022450.t1.1	PF07707
			Cre01.g022462	#N/A	30788669	Cre01.g022462.t1.2	Cre01.g022462.t1.2
			Cre01.g022500	#N/A	30789495	Cre01.g022500.t1.2	Cre01.g022500.t1.2	PF00390,PF03949	PTHR23406:SF2,PTHR23406	KOG1257			GO:0016616,GO:0051287	AT1G79750.1	ATNADP-ME4,NADP-ME4	NADP-malic enzyme 4
			Cre01.g022550	#N/A	30788631	Cre01.g022550.t1.1	Cre01.g022550.t1.1
			Cre01.g022600	#N/A	30789242	Cre01.g022600.t1.1	Cre01.g022600.t1.1	PF03567					GO:0008146,GO:0016021	AT1G08030.1	TPST	tyrosylprotein sulfotransferase
			Cre01.g022600	#N/A	30789243	Cre01.g022600.t2.1	Cre01.g022600.t2.1	PF03567					GO:0008146,GO:0016021	AT1G08030.1	TPST	tyrosylprotein sulfotransferase
			Cre01.g022650	#N/A	30788794	Cre01.g022650.t1.2	Cre01.g022650.t1.2	PF00795	PTHR23088	KOG0808	3.5.1.6	K01431	GO:0006807,GO:0016810	AT5G64370.1	BETA-UP,PYD3	beta-ureidopropionase
			Cre01.g022666	#N/A	30788624	Cre01.g022666.t1.1	Cre01.g022666.t1.1
			Cre01.g022681	#N/A	30789608	Cre01.g022681.t1.1	Cre01.g022681.t1.1
			Cre01.g022681	#N/A	30789609	Cre01.g022681.t2.1	Cre01.g022681.t2.1
			Cre01.g022700	#N/A	30788835	Cre01.g022700.t1.1	Cre01.g022700.t1.1
			Cre01.g022750	#N/A	30788376	Cre01.g022750.t1.1	Cre01.g022750.t1.1
			Cre01.g022800	#N/A	30788990	Cre01.g022800.t1.1	Cre01.g022800.t1.1
			Cre01.g022850	#N/A	30788851	Cre01.g022850.t1.2	Cre01.g022850.t1.2
			Cre01.g022900	#N/A	30788380	Cre01.g022900.t1.1	Cre01.g022900.t1.1
			Cre01.g022950	#N/A	30789148	Cre01.g022950.t1.2	Cre01.g022950.t1.2	PF00651	PTHR24413				GO:0005515	AT3G17380.1		TRAF-like family protein
			Cre01.g023000	#N/A	30789557	Cre01.g023000.t1.1	Cre01.g023000.t1.1	PF07690	PTHR11662:SF23,PTHR11662	KOG2532			GO:0016021,GO:0055085	AT2G29650.1	ANTR1,PHT4;1	phosphate transporter 4;1
			Cre01.g023050	#N/A	30788944	Cre01.g023050.t1.2	Cre01.g023050.t1.2	PF09409						AT2G01650.1	PUX2	plant UBX domain-containing protein 2
			Cre01.g023100	#N/A	30789375	Cre01.g023100.t1.1	Cre01.g023100.t1.1	PF00847					GO:0003700,GO:0006355	AT5G67180.1	TOE3	target of early activation tagged (EAT) 3
			Cre01.g023150	#N/A	30789174	Cre01.g023150.t1.2	Cre01.g023150.t1.2	PF00493	PTHR11630,PTHR11630:SF42	KOG0481		K02209	GO:0003677,GO:0005524,GO:0006260	AT2G07690.1	MCM5	Minichromosome maintenance (MCM2/3/5) family protein
			Cre01.g023200	#N/A	30788590	Cre01.g023200.t1.2	Cre01.g023200.t1.2
			Cre01.g023250	#N/A	30789224	Cre01.g023250.t1.1	Cre01.g023250.t1.1
			Cre01.g023300	#N/A	30789500	Cre01.g023300.t1.2	Cre01.g023300.t1.2	PF01408	PTHR22604,PTHR22604:SF45	KOG2742			GO:0016491	AT3G20790.1		NAD(P)-binding Rossmann-fold superfamily protein
			Cre01.g023350	#N/A	30788916	Cre01.g023350.t1.1	Cre01.g023350.t1.1	PF01432					GO:0004222,GO:0006508
			Cre01.g023400	#N/A	30788790	Cre01.g023400.t1.1	Cre01.g023400.t1.1	PF04791				K14617		AT5G01460.1		LMBR1-like membrane protein
			Cre01.g023450	#N/A	30789235	Cre01.g023450.t1.2	Cre01.g023450.t1.2
			Cre01.g023500	#N/A	30788637	Cre01.g023500.t1.2	Cre01.g023500.t1.2			KOG0977
			Cre01.g023550	#N/A	30789076	Cre01.g023550.t1.1	Cre01.g023550.t1.1		PTHR10588:SF19,PTHR10588	KOG1947				AT5G22320.1		Leucine-rich repeat (LRR) family protein
			Cre01.g023600	#N/A	30789111	Cre01.g023600.t1.2	Cre01.g023600.t1.2	PF01370	PTHR10366,PTHR10366:SF9				GO:0003824,GO:0044237,GO:0050662	AT1G51410.1		NAD(P)-binding Rossmann-fold superfamily protein
			Cre01.g023650	#N/A	30788474	Cre01.g023650.t1.1	Cre01.g023650.t1.1	PF00324	PTHR11785,PTHR11785:SF13	KOG1289			GO:0006810,GO:0016020,GO:0055085,GO:0003333,GO:0015171	AT2G01170.1	BAT1	bidirectional amino acid transporter 1
			Cre01.g023750	#N/A	30788911	Cre01.g023750.t1.1	Cre01.g023750.t1.1
			Cre01.g023773	#N/A	30789684	Cre01.g023773.t1.2	Cre01.g023773.t1.2	PF00498					GO:0005515
			Cre01.g023787	#N/A	30789637	Cre01.g023787.t1.1	Cre01.g023787.t1.1	PF00005	PTHR19211:SF15,PTHR19211	KOG2355			GO:0005524,GO:0016887	AT5G60790.1	ATGCN1,GCN1	ABC transporter family protein
			Cre01.g023800	#N/A	30788776	Cre01.g023800.t1.1	Cre01.g023800.t1.1			KOG2812				AT4G36690.4	ATU2AF65A	U2 snRNP auxilliary factor, large subunit, splicing factor
			Cre01.g023850	#N/A	30789690	Cre01.g023850.t1.1	Cre01.g023850.t1.1
			Cre01.g023900	#N/A	30789321	Cre01.g023900.t1.1	Cre01.g023900.t1.1
			Cre01.g023913	#N/A	30789388	Cre01.g023913.t1.2	Cre01.g023913.t1.2
			Cre01.g023950	#N/A	30788615	Cre01.g023950.t1.1	Cre01.g023950.t1.1
			Cre01.g024000	#N/A	30789263	Cre01.g024000.t1.1	Cre01.g024000.t1.1
			Cre01.g024050	#N/A	30788440	Cre01.g024050.t1.2	Cre01.g024050.t1.2		PTHR23083,PTHR23083:SF208
			Cre01.g024100	#N/A	30789090	Cre01.g024100.t1.1	Cre01.g024100.t1.1
			Cre01.g024150	#N/A	30789568	Cre01.g024150.t1.2	Cre01.g024150.t1.2
			Cre01.g024200	#N/A	30788323	Cre01.g024200.t1.1	Cre01.g024200.t1.1	PF00076	PTHR23139,PTHR23139:SF13	KOG0108		K14407	GO:0003676	AT1G71800.1	CSTF64	cleavage stimulating factor 64
			Cre01.g024250	#N/A	30788318	Cre01.g024250.t1.1	Cre01.g024250.t1.1
			Cre01.g024251	#N/A	30789144	Cre01.g024251.t1.2	Cre01.g024251.t1.2	PF08482,PF00271,PF00270,PF04408	PTHR18934	KOG0922			GO:0003676,GO:0004386,GO:0005524,GO:0008026	AT1G32490.1	EMB2733,ESP3	RNA helicase family protein
			Cre01.g024300	#N/A	30788307	Cre01.g024300.t1.2	Cre01.g024300.t1.2	PF01398,PF08969	PTHR12947	KOG2880	3.1.2.15	K11866	GO:0005515	AT1G48790.1	AMSH1	associated molecule with the SH3 domain of STAM 1
			Cre01.g024350	#N/A	30789351	Cre01.g024350.t1.2	Cre01.g024350.t1.2	PF02990	PTHR10766,PTHR10766:SF14	KOG1277			GO:0016021	AT2G01970.1		Endomembrane protein 70 protein family
			Cre01.g024400	#N/A	30788567	Cre01.g024400.t1.1	Cre01.g024400.t1.1		PTHR12975,PTHR12975:SF6	KOG1938				AT5G16280.1		Tetratricopeptide repeat (TPR)-like superfamily protein
			Cre01.g024500	#N/A	30789497	Cre01.g024500.t1.1	Cre01.g024500.t1.1
			Cre01.g024550	#N/A	30788929	Cre01.g024550.t1.1	Cre01.g024550.t1.1	PF00069	PTHR23257:SF278,PTHR23257	KOG0192			GO:0004672,GO:0005524,GO:0006468	AT1G08720.1	ATEDR1,EDR1	Protein kinase superfamily protein
			Cre01.g024601	#N/A	30789571	Cre01.g024601.t1.1	Cre01.g024601.t1.1
			Cre01.g024650	#N/A	30788855	Cre01.g024650.t1.1	Cre01.g024650.t1.1	PF07714,PF00024	PTHR11612,PTHR11612:SF57	KOG0192			GO:0004672,GO:0006468	AT1G18160.1		Protein kinase superfamily protein
			Cre01.g024750	#N/A	30789702	Cre01.g024750.t1.1	Cre01.g024750.t1.1	PF00069	PTHR11612,PTHR11612:SF57	KOG0192			GO:0004672,GO:0005524,GO:0006468	AT1G18160.1		Protein kinase superfamily protein
			Cre01.g024800	#N/A	30789335	Cre01.g024800.t1.1	Cre01.g024800.t1.1	PF00069	PTHR11612,PTHR11612:SF57	KOG0192			GO:0004672,GO:0005524,GO:0006468	AT1G18160.1		Protein kinase superfamily protein
			Cre01.g024850	#N/A	30789451	Cre01.g024850.t1.1	Cre01.g024850.t1.1	PF00581	PTHR10828,PTHR10828:SF18				GO:0000087,GO:0004725,GO:0005622,GO:0006470	AT5G03455.1	ACR2,ARATH;CDC25,CDC25	Rhodanese/Cell cycle control phosphatase superfamily protein
			Cre01.g024900	#N/A	30789207	Cre01.g024900.t1.1	Cre01.g024900.t1.1	PF00076	PTHR24011,PTHR24011:SF180	KOG4725			GO:0003676	AT1G21320.2		nucleotide binding;nucleic acid binding
			Cre01.g024950	#N/A	30788339	Cre01.g024950.t1.2	Cre01.g024950.t1.2		PTHR12444					AT5G21080.1		Uncharacterized protein
			Cre01.g025000	#N/A	30789122	Cre01.g025000.t1.2	Cre01.g025000.t1.2	PF07856	PTHR12210:SF19,PTHR12210
			Cre01.g025025	#N/A	30788917	Cre01.g025025.t1.1	Cre01.g025025.t1.1	PF07460					GO:0004519
			Cre01.g025050	#N/A	30789708	Cre01.g025050.t1.2	Cre01.g025050.t1.2	PF00320	PTHR10071				GO:0003700,GO:0006355,GO:0008270,GO:0043565	AT4G32890.1	GATA9	GATA transcription factor 9
			Cre01.g025100	#N/A	30788721	Cre01.g025100.t1.1	Cre01.g025100.t1.1	PF00702	PTHR18901				GO:0003824,GO:0008152	AT2G33255.1		Haloacid dehalogenase-like hydrolase (HAD) superfamily protein
			Cre01.g025150	#N/A	30788523	Cre01.g025150.t1.2	Cre01.g025150.t1.2							AT5G17670.1		alpha/beta-Hydrolases superfamily protein
			Cre01.g025200	#N/A	30789355	Cre01.g025200.t1.2	Cre01.g025200.t1.2	PF05548
			Cre01.g025250	#N/A	30788519	Cre01.g025250.t1.1	Cre01.g025250.t1.1	PF01687	PTHR22749	KOG3110			GO:0008531,GO:0009231	AT4G21470.1	ATFMN/FHY,FMN/FHY	riboflavin kinase/FMN hydrolase
			Cre01.g025300	#N/A	30789064	Cre01.g025300.t1.1	Cre01.g025300.t1.1	PF08423	PTHR22942,PTHR22942:SF15	KOG1564		K10869		AT2G28560.1	ATRAD51B,RAD51B	DNA repair (Rad51) family protein
			Cre01.g025350	#N/A	30788480	Cre01.g025350.t1.2	Cre01.g025350.t1.2	PF03703
			Cre01.g025400	#N/A	30788864	Cre01.g025400.t1.2	Cre01.g025400.t1.2		PTHR23053
			Cre01.g025450	#N/A	30788405	Cre01.g025450.t1.2	Cre01.g025450.t1.2	PF00612					GO:0005515
			Cre01.g025500	#N/A	30788676	Cre01.g025500.t1.1	Cre01.g025500.t1.1		PTHR19959					AT5G37590.1		Tetratricopeptide repeat (TPR)-like superfamily protein
			Cre01.g025551	#N/A	30789646	Cre01.g025551.t1.1	Cre01.g025551.t1.1
			Cre01.g025600	#N/A	30788493	Cre01.g025600.t1.2	Cre01.g025600.t1.2
			Cre01.g025650	#N/A	30789294	Cre01.g025650.t1.2	Cre01.g025650.t1.2
			Cre01.g025700	#N/A	30788316	Cre01.g025700.t1.1	Cre01.g025700.t1.1	PF01547	PTHR11017				GO:0005215,GO:0006810
			Cre01.g025726	#N/A	30788371	Cre01.g025726.t1.1	Cre01.g025726.t1.1
			Cre01.g025750	#N/A	30789625	Cre01.g025750.t1.1	Cre01.g025750.t1.1	PF01551
			Cre01.g025767	#N/A	30788841	Cre01.g025767.t1.2	Cre01.g025767.t1.2	PF08457
			Cre01.g025808	#N/A	30788488	Cre01.g025808.t1.1	Cre01.g025808.t1.1
			Cre01.g025850	#N/A	30789307	Cre01.g025850.t1.2	Cre01.g025850.t1.2	PF05153	PTHR12588	KOG1573	1.13.99.1	K00469	GO:0005506,GO:0005737,GO:0019310,GO:0050113,GO:0055114	AT1G14520.1	MIOX1	myo-inositol oxygenase 1
			Cre01.g025900	#N/A	30789384	Cre01.g025900.t1.2	Cre01.g025900.t1.2	PF00415	PTHR22870	KOG1427				AT5G08710.1		Regulator of chromosome condensation (RCC1) family protein
			Cre01.g025950	#N/A	30788767	Cre01.g025950.t1.2	Cre01.g025950.t1.2	PF01535	PTHR24015,PTHR24015:SF207					AT4G31850.1	PGR3	proton gradient regulation 3
			Cre01.g025983	#N/A	30788962	Cre01.g025983.t1.1	Cre01.g025983.t1.1	PF07173						AT4G37900.1		Protein of unknown function (duplicated DUF1399)
			Cre01.g026016	#N/A	30789383	Cre01.g026016.t1.1	Cre01.g026016.t1.1
			Cre01.g026050	#N/A	30788329	Cre01.g026050.t1.1	Cre01.g026050.t1.1
			Cre01.g026100	#N/A	30789518	Cre01.g026100.t1.2	Cre01.g026100.t1.2	PF01900	PTHR10993,PTHR10993:SF1	KOG4639	3.1.26.5	K03537	GO:0004540,GO:0008033	AT1G04635.1	EMB1687	ribonuclease P family protein / Rpp14 family protein
			Cre01.g026100	#N/A	30789519	Cre01.g026100.t2.1	Cre01.g026100.t2.1	PF01900	PTHR10993,PTHR10993:SF1	KOG4639	3.1.26.5	K03537	GO:0004540,GO:0008033	AT1G04635.1	EMB1687	ribonuclease P family protein / Rpp14 family protein
			Cre01.g026150	#N/A	30788749	Cre01.g026150.t1.1	Cre01.g026150.t1.1	PF01432					GO:0004222,GO:0006508
			Cre01.g026200	#N/A	30789457	Cre01.g026200.t1.2	Cre01.g026200.t1.2	PF01535	PTHR24633					AT4G37380.1		Tetratricopeptide repeat (TPR)-like superfamily protein
			Cre01.g026250	#N/A	30788913	Cre01.g026250.t1.2	Cre01.g026250.t1.2	PF01549,PF02065	PTHR11452	KOG2366	3.2.1.22	K07407	GO:0004553,GO:0005975	AT5G08370.1	AGAL2,AtAGAL2	alpha-galactosidase 2
			Cre01.g026300	#N/A	30789689	Cre01.g026300.t1.2	Cre01.g026300.t1.2	PF08238	PTHR11102	KOG4014				AT1G18260.1		HCP-like superfamily protein
			Cre01.g026350	#N/A	30788475	Cre01.g026350.t1.1	Cre01.g026350.t1.1
			Cre01.g026400	#N/A	30789268	Cre01.g026400.t1.1	Cre01.g026400.t1.1	PF03124	PTHR10783,PTHR10783:SF9				GO:0016021	AT5G35730.1		EXS (ERD1/XPR1/SYG1) family protein
			Cre01.g026450	#N/A	30788658	Cre01.g026450.t1.2	Cre01.g026450.t1.2	PF00076	PTHR10548	KOG0105			GO:0003676	AT1G02840.1	ATSRP34,SR1,SRP34	RNA-binding (RRM/RBD/RNP motifs) family protein
			Cre01.g026500	#N/A	30788666	Cre01.g026500.t1.1	Cre01.g026500.t1.1	PF00026	PTHR13683,PTHR13683:SF98	KOG1339			GO:0004190,GO:0006508	AT5G43100.1		Eukaryotic aspartyl protease family protein
			Cre01.g026550	#N/A	30789046	Cre01.g026550.t1.1	Cre01.g026550.t1.1	PF00118	PTHR11353:SF22,PTHR11353	KOG0361			GO:0005524,GO:0006457,GO:0051082,GO:0044267	AT3G11830.1		TCP-1/cpn60 chaperonin family protein
			Cre01.g026600	#N/A	30789061	Cre01.g026600.t1.2	Cre01.g026600.t1.2	PF00179	PTHR24067,PTHR24067:SF30	KOG0417	6.3.2.19	K10580	GO:0016881	AT1G16890.2	UBC13B,UBC36	ubiquitin-conjugating enzyme 36
			Cre01.g026650	#N/A	30789369	Cre01.g026650.t1.2	Cre01.g026650.t1.2	PF00994	PTHR23293				GO:0006777	AT5G03430.1		phosphoadenosine phosphosulfate (PAPS) reductase family protein
			Cre01.g026700	#N/A	30788593	Cre01.g026700.t1.1	Cre01.g026700.t1.1
			Cre01.g026750	#N/A	30789674	Cre01.g026750.t1.1	Cre01.g026750.t1.1
			Cre01.g026800	#N/A	30788867	Cre01.g026800.t1.1	Cre01.g026800.t1.1
			Cre01.g026850	#N/A	30789095	Cre01.g026850.t1.1	Cre01.g026850.t1.1
			Cre01.g026900	#N/A	30789640	Cre01.g026900.t1.2	Cre01.g026900.t1.2	PF01494	PTHR13789:SF100,PTHR13789	KOG2614			GO:0004497,GO:0055114	AT2G29720.1	CTF2B	FAD/NAD(P)-binding oxidoreductase family protein
			Cre01.g026900	#N/A	30789641	Cre01.g026900.t2.1	Cre01.g026900.t2.1	PF01494	PTHR13789:SF100,PTHR13789	KOG2614			GO:0004497,GO:0055114	AT2G29720.1	CTF2B	FAD/NAD(P)-binding oxidoreductase family protein
			Cre01.g026950	#N/A	30789226	Cre01.g026950.t1.2	Cre01.g026950.t1.2
			Cre01.g027000	#N/A	30788418	Cre01.g027000.t1.2	Cre01.g027000.t1.2	PF00673,PF00281	PTHR11994:SF2,PTHR11994	KOG0397			GO:0003735,GO:0005622,GO:0005840,GO:0006412	AT2G42740.1	RPL16A	ribosomal protein large subunit 16A
			Cre01.g027050	#N/A	30789238	Cre01.g027050.t1.1	Cre01.g027050.t1.1	PF11527
			Cre01.g027100	#N/A	30788465	Cre01.g027100.t1.2	Cre01.g027100.t1.2	PF00717	PTHR12383:SF8,PTHR12383	KOG1568	3.4.99.-	K09648		AT3G08980.1		Peptidase S24/S26A/S26B/S26C family protein
			Cre01.g027150	#N/A	30789072	Cre01.g027150.t1.1	Cre01.g027150.t1.1	PF08148,PF00270	PTHR11752:SF2,PTHR11752	KOG0947			GO:0005524,GO:0016818,GO:0003676,GO:0008026	AT1G70070.1	EMB25,ISE2,PDE317	DEAD/DEAH box helicase, putative
			Cre01.g027200	#N/A	30788438	Cre01.g027200.t1.2	Cre01.g027200.t1.2	PF00179	PTHR24067,PTHR24067:SF19	KOG0416	6.3.2.19	K10576	GO:0016881	AT1G63800.1	UBC5	ubiquitin-conjugating enzyme 5
			Cre01.g027250	#N/A	30789492	Cre01.g027250.t1.2	Cre01.g027250.t1.2
			Cre01.g027300	#N/A	30788885	Cre01.g027300.t1.1	Cre01.g027300.t1.1
			Cre01.g027350	#N/A	30788610	Cre01.g027350.t1.2	Cre01.g027350.t1.2	PF00588	PTHR12029:SF11,PTHR12029				GO:0003723,GO:0006396,GO:0008173	AT4G17610.1		tRNA/rRNA methyltransferase (SpoU) family protein
			Cre01.g027350	#N/A	30788611	Cre01.g027350.t2.1	Cre01.g027350.t2.1	PF00588	PTHR12029:SF11,PTHR12029				GO:0003723,GO:0006396,GO:0008173	AT4G17610.1		tRNA/rRNA methyltransferase (SpoU) family protein
			Cre01.g027350	#N/A	30788612	Cre01.g027350.t3.1	Cre01.g027350.t3.1	PF00588	PTHR12029:SF11,PTHR12029				GO:0003723,GO:0006396,GO:0008173	AT4G17610.1		tRNA/rRNA methyltransferase (SpoU) family protein
			Cre01.g027400	#N/A	30788703	Cre01.g027400.t1.1	Cre01.g027400.t1.1
			Cre01.g027400	#N/A	30788704	Cre01.g027400.t2.1	Cre01.g027400.t2.1
			Cre01.g027450	#N/A	30788389	Cre01.g027450.t1.2	Cre01.g027450.t1.2	PF00085	PTHR10438:SF10,PTHR10438	KOG0907			GO:0045454,GO:0006662,GO:0009055,GO:0015035	AT3G53220.1		Thioredoxin superfamily protein
			Cre01.g027500	#N/A	30789218	Cre01.g027500.t1.1	Cre01.g027500.t1.1	PF00622					GO:0005515
			Cre01.g027550	#N/A	30788469	Cre01.g027550.t1.1	Cre01.g027550.t1.1	PF00067	PTHR24301,PTHR24301:SF127				GO:0005506,GO:0009055,GO:0016705,GO:0020037	AT4G15110.1	CYP97B3	cytochrome P450, family 97, subfamily B, polypeptide 3
			Cre01.g027575	#N/A	30788965	Cre01.g027575.t1.1	Cre01.g027575.t1.1
			Cre01.g027600	#N/A	30788973	Cre01.g027600.t1.1	Cre01.g027600.t1.1
			Cre01.g027650	#N/A	30789538	Cre01.g027650.t1.2	Cre01.g027650.t1.2
			Cre01.g027700	#N/A	30788661	Cre01.g027700.t1.2	Cre01.g027700.t1.2
			Cre01.g027750	#N/A	30789020	Cre01.g027750.t1.1	Cre01.g027750.t1.1
			Cre01.g027764	#N/A	30789265	Cre01.g027764.t1.2	Cre01.g027764.t1.2	PF01554	PTHR11206:SF38,PTHR11206	KOG1347			GO:0006855,GO:0015238,GO:0015297,GO:0016020,GO:0055085	AT5G52450.1		MATE efflux family protein
			Cre01.g027800	#N/A	30788528	Cre01.g027800.t1.2	Cre01.g027800.t1.2	PF03224,PF11698	PTHR10698	KOG2759	3.6.3.14	K02144	GO:0000221,GO:0015991,GO:0046961,GO:0016820	AT3G42050.1		vacuolar ATP synthase subunit H family protein
			Cre01.g027850	#N/A	30789006	Cre01.g027850.t1.1	Cre01.g027850.t1.1	PF08547	PTHR13194,PTHR13194:SF9					AT4G18810.2		NAD(P)-binding Rossmann-fold superfamily protein
			Cre01.g027900	#N/A	30789415	Cre01.g027900.t1.2	Cre01.g027900.t1.2	PF03134	PTHR12300,PTHR12300:SF20	KOG1725				AT5G42560.1		Abscisic acid-responsive (TB2/DP1, HVA22) family protein
			Cre01.g027950	#N/A	30788460	Cre01.g027950.t1.2	Cre01.g027950.t1.2
			Cre01.g028000	#N/A	30788378	Cre01.g028000.t1.1	Cre01.g028000.t1.1			KOG1003
			Cre01.g028050	#N/A	30788309	Cre01.g028050.t1.2	Cre01.g028050.t1.2
			Cre01.g028101	#N/A	30789290	Cre01.g028101.t1.1	Cre01.g028101.t1.1
			Cre01.g028150	#N/A	30788483	Cre01.g028150.t1.2	Cre01.g028150.t1.2							AT1G76060.1	EMB1793	LYR family of Fe/S cluster biogenesis protein
			Cre01.g028200	#N/A	30789461	Cre01.g028200.t1.1	Cre01.g028200.t1.1	PF00271,PF00270	PTHR24031:SF50,PTHR24031	KOG0331	3.6.4.13	K12823	GO:0003676,GO:0004386,GO:0005524,GO:0008026	AT1G55150.1		DEA(D/H)-box RNA helicase family protein
			Cre01.g028200	#N/A	30789462	Cre01.g028200.t2.1	Cre01.g028200.t2.1	PF00271,PF00270	PTHR24031:SF50,PTHR24031	KOG0331	3.6.4.13	K12823	GO:0003676,GO:0004386,GO:0005524,GO:0008026	AT1G55150.1		DEA(D/H)-box RNA helicase family protein
			Cre01.g028250	#N/A	30789397	Cre01.g028250.t1.2	Cre01.g028250.t1.2	PF12146,PF00561	PTHR11614,PTHR11614:SF28	KOG1455	3.1.1.23	K01054		AT1G18360.1		alpha/beta-Hydrolases superfamily protein
			Cre01.g028300	#N/A	30788958	Cre01.g028300.t1.2	Cre01.g028300.t1.2
			Cre01.g028350	#N/A	30789587	Cre01.g028350.t1.1	Cre01.g028350.t1.1	PF00089	PTHR22939,PTHR22939:SF23	KOG1320	3.4.21.-	K01362	GO:0004252,GO:0006508	AT5G39830.1	DEG8,DEGP8	Trypsin family protein with PDZ domain
			Cre01.g028400	#N/A	30789167	Cre01.g028400.t1.1	Cre01.g028400.t1.1	PF01753					GO:0008270
			Cre01.g028423	#N/A	30789188	Cre01.g028423.t1.2	Cre01.g028423.t1.2	PF00282	PTHR11999,PTHR11999:SF11	KOG0628	4.1.1.25	K01592	GO:0016831,GO:0019752,GO:0030170	AT2G20340.1		Pyridoxal phosphate (PLP)-dependent transferases superfamily protein
			Cre01.g028450	#N/A	30788447	Cre01.g028450.t1.2	Cre01.g028450.t1.2	PF04055					GO:0003824,GO:0051536	AT3G19630.1		Radical SAM superfamily protein
			Cre01.g028500	#N/A	30789398	Cre01.g028500.t1.2	Cre01.g028500.t1.2							AT5G57460.1
			Cre01.g028550	#N/A	30788959	Cre01.g028550.t1.2	Cre01.g028550.t1.2	PF02338	PTHR12419	KOG2606				AT3G62940.2		Cysteine proteinases superfamily protein
			Cre01.g028600	#N/A	30788633	Cre01.g028600.t1.2	Cre01.g028600.t1.2	PF00106	PTHR24322	KOG0725			GO:0008152,GO:0016491	AT2G29290.2		NAD(P)-binding Rossmann-fold superfamily protein
			Cre01.g028650	#N/A	30789193	Cre01.g028650.t1.2	Cre01.g028650.t1.2
			Cre01.g028713	#N/A	30788601	Cre01.g028713.t1.1	Cre01.g028713.t1.1
			Cre01.g028777	#N/A	30789147	Cre01.g028777.t1.2	Cre01.g028777.t1.2
			Cre01.g028850	#N/A	30789582	Cre01.g028850.t1.2	Cre01.g028850.t1.2	PF00581		KOG1530
			Cre01.g028900	#N/A	30788324	Cre01.g028900.t1.1	Cre01.g028900.t1.1		PTHR10366,PTHR10366:SF1
			Cre01.g028950	#N/A	30788538	Cre01.g028950.t1.2	Cre01.g028950.t1.2	PF00581		KOG1530
			Cre01.g029000	#N/A	30788727	Cre01.g029000.t1.2	Cre01.g029000.t1.2	PF08241	PTHR10108,PTHR10108:SF237				GO:0008152,GO:0008168	AT1G48600.1	AtPMEAMT,PMEAMT	S-adenosyl-L-methionine-dependent methyltransferases superfamily protein
			Cre01.g029050	#N/A	30789485	Cre01.g029050.t1.2	Cre01.g029050.t1.2	PF10607,PF08513	PTHR12864	KOG2659				AT1G61150.1		LisH and RanBPM domains containing protein
			Cre01.g029100	#N/A	30788679	Cre01.g029100.t1.2	Cre01.g029100.t1.2	PF05916	PTHR12772	KOG4071		K10733	GO:0005634,GO:0006260	AT3G12530.1	PSF2	PSF2
			Cre01.g029150	#N/A	30789629	Cre01.g029150.t1.2	Cre01.g029150.t1.2	PF00560	PTHR10588:SF7,PTHR10588	KOG2739			GO:0005515	AT5G22320.1		Leucine-rich repeat (LRR) family protein
			Cre01.g029200	#N/A	30788620	Cre01.g029200.t1.1	Cre01.g029200.t1.1	PF03568	PTHR12792		3.4.22.49	K02365	GO:0005634,GO:0006508,GO:0008233	AT4G22970.1	AESP,ESP,RSW4	homolog of separase
			Cre01.g029250	#N/A	30789244	Cre01.g029250.t1.2	Cre01.g029250.t1.2	PF00351	PTHR11473		1.14.16.1	K00500	GO:0016714,GO:0055114,GO:0004497,GO:0005506,GO:0009072
			Cre01.g029300	#N/A	30788345	Cre01.g029300.t1.2	Cre01.g029300.t1.2	PF00121	PTHR21139	KOG1643	5.3.1.1	K01803	GO:0004807,GO:0008152	AT2G21170.1	PDTPI,TIM	triosephosphate isomerase
			Cre01.g029350	#N/A	30789320	Cre01.g029350.t1.2	Cre01.g029350.t1.2
			Cre01.g029400	#N/A	30788584	Cre01.g029400.t1.2	Cre01.g029400.t1.2	PF08016
			Cre01.g029450	#N/A	30788422	Cre01.g029450.t1.1	Cre01.g029450.t1.1	PF00505,PF03531	PTHR13711:SF58,PTHR13711	KOG0526		K09272	GO:0003677,GO:0005634	AT3G28730.1	ATHMG,HMG,NFD,SSRP1	high mobility group
			Cre01.g029500	#N/A	30789035	Cre01.g029500.t1.2	Cre01.g029500.t1.2	PF00069	PTHR24347,PTHR24347:SF122	KOG0583			GO:0004672,GO:0005524,GO:0006468	AT3G45240.1	ATSNAK2,GRIK1	geminivirus rep interacting kinase 1
			Cre01.g029550	#N/A	30788592	Cre01.g029550.t1.1	Cre01.g029550.t1.1
			Cre01.g029600	#N/A	30789197	Cre01.g029600.t1.2	Cre01.g029600.t1.2	PF05042						AT4G26740.1	ATPXG1,ATS1,CLO1	seed gene 1
			Cre01.g029650	#N/A	30789513	Cre01.g029650.t1.1	Cre01.g029650.t1.1	PF03635	PTHR11099	KOG1107				AT2G17790.1	VPS35A,ZIP3	VPS35 homolog A
			Cre01.g029700	#N/A	30788686	Cre01.g029700.t1.2	Cre01.g029700.t1.2
			Cre01.g029750	#N/A	30789698	Cre01.g029750.t1.1	Cre01.g029750.t1.1	PF00406	PTHR23359,PTHR23359:SF23	KOG3079	2.7.4.3	K00939	GO:0005524,GO:0006139,GO:0019205	AT5G26667.2	PYR6	P-loop containing nucleoside triphosphate hydrolases superfamily protein
			Cre01.g029800	#N/A	30788360	Cre01.g029800.t1.2	Cre01.g029800.t1.2
			Cre01.g029850	#N/A	30789168	Cre01.g029850.t1.2	Cre01.g029850.t1.2	PF00433,PF00069	PTHR24358:SF32,PTHR24358	KOG0605			GO:0004674,GO:0005524,GO:0006468,GO:0004672	AT1G30640.1		Protein kinase family protein
			Cre01.g029900	#N/A	30788563	Cre01.g029900.t1.2	Cre01.g029900.t1.2	PF01061,PF00005	PTHR19241,PTHR19241:SF86	KOG0061			GO:0016020,GO:0005524,GO:0016887	AT3G55090.1		ABC-2 type transporter family protein
			Cre01.g029950	#N/A	30788685	Cre01.g029950.t1.2	Cre01.g029950.t1.2
			Cre01.g030000	#N/A	30789446	Cre01.g030000.t1.1	Cre01.g030000.t1.1
			Cre01.g030050	#N/A	30788509	Cre01.g030050.t1.2	Cre01.g030050.t1.2	PF00468	PTHR14503	KOG4612			GO:0003735,GO:0005622,GO:0005840,GO:0006412	AT1G29070.1		Ribosomal protein L34
			Cre01.g030100	#N/A	30789084	Cre01.g030100.t1.1	Cre01.g030100.t1.1	PF07714	PTHR23257:SF334,PTHR23257	KOG0192			GO:0004672,GO:0006468	AT2G40860.1		protein kinase family protein / protein phosphatase 2C ( PP2C) family protein
			Cre01.g030100	#N/A	30789085	Cre01.g030100.t2.1	Cre01.g030100.t2.1	PF07714	PTHR23257:SF334,PTHR23257	KOG0192			GO:0004672,GO:0006468	AT2G40860.1		protein kinase family protein / protein phosphatase 2C ( PP2C) family protein
			Cre01.g030150	#N/A	30788439	Cre01.g030150.t1.2	Cre01.g030150.t1.2	PF09739	PTHR13489	KOG2545				AT2G40550.1	ETG1	E2F target gene 1
			Cre01.g030200	#N/A	30788822	Cre01.g030200.t1.2	Cre01.g030200.t1.2	PF00481	PTHR13832,PTHR13832:SF94	KOG0698			GO:0003824	AT1G79630.1		Protein phosphatase 2C family protein
			Cre01.g030250	#N/A	30789365	Cre01.g030250.t1.2	Cre01.g030250.t1.2	PF00459	PTHR20854:SF3,PTHR20854	KOG1528	3.1.3.57,3.1.3.7	K01082,K01107	GO:0004437	AT5G63980.1	ALX8,ATSAL1,FRY1,HOS2,RON1,SAL1	Inositol monophosphatase family protein
			Cre01.g030300	#N/A	30788999	Cre01.g030300.t1.1	Cre01.g030300.t1.1	PF00892					GO:0016020	AT5G12170.2	CLT3	CRT (chloroquine-resistance transporter)-like transporter 3
			Cre01.g030300	#N/A	30789000	Cre01.g030300.t2.1	Cre01.g030300.t2.1							AT5G12170.2	CLT3	CRT (chloroquine-resistance transporter)-like transporter 3
			Cre01.g030350	#N/A	30789583	Cre01.g030350.t1.1	Cre01.g030350.t1.1	PF02341						AT4G04330.1		Chaperonin-like RbcX protein
			Cre01.g030400	#N/A	30788768	Cre01.g030400.t1.1	Cre01.g030400.t1.1
			Cre01.g030450	#N/A	30788364	Cre01.g030450.t1.1	Cre01.g030450.t1.1	PF00443	PTHR24006,PTHR24006:SF196	KOG1864	3.1.2.15	K11858	GO:0004221,GO:0006511	AT3G49600.1	ATUBP26,SUP32,UBP26	ubiquitin-specific protease 26
			Cre01.g030500	#N/A	30788897	Cre01.g030500.t1.2	Cre01.g030500.t1.2	PF00211	PTHR11920				GO:0009190,GO:0016849,GO:0035556
			Cre01.g030550	#N/A	30789155	Cre01.g030550.t1.2	Cre01.g030550.t1.2	PF09409	PTHR13020,PTHR13020:SF20	KOG2699				AT1G04850.1		ubiquitin-associated (UBA)/TS-N domain-containing protein
			Cre01.g030600	#N/A	30788687	Cre01.g030600.t1.1	Cre01.g030600.t1.1	PF00069	PTHR23257,PTHR23257:SF335	KOG0192			GO:0004672,GO:0005524,GO:0006468	AT3G63260.1	ATMRK1	Protein kinase superfamily protein
			Cre01.g030650	#N/A	30789664	Cre01.g030650.t1.2	Cre01.g030650.t1.2	PF03441,PF00875	PTHR11455				GO:0003913,GO:0006281	AT5G24850.1	CRY3	cryptochrome 3
			Cre01.g030700	#N/A	30788542	Cre01.g030700.t1.1	Cre01.g030700.t1.1	PF07714	PTHR23257,PTHR23257:SF335				GO:0004672,GO:0006468	AT3G63260.1	ATMRK1	Protein kinase superfamily protein
			Cre01.g030800	#N/A	30788375	Cre01.g030800.t1.2	Cre01.g030800.t1.2	PF01399	PTHR10678	KOG1464		K12176	GO:0005515	AT2G26990.1	ATCSN2,COP12,CSN2,FUS12	proteasome family protein
			Cre01.g030850	#N/A	30789302	Cre01.g030850.t1.2	Cre01.g030850.t1.2	PF00227,PF10584	PTHR11599,PTHR11599:SF15	KOG0183	3.4.25.1	K02731	GO:0004298,GO:0005839,GO:0051603,GO:0004175,GO:0006511,GO:0019773	AT5G66140.1	PAD2	proteasome alpha subunit D2
			Cre01.g030900	#N/A	30788595	Cre01.g030900.t1.1	Cre01.g030900.t1.1	PF00501	PTHR24095:SF47,PTHR24095				GO:0003824,GO:0008152	AT1G30520.1	AAE14	acyl-activating enzyme 14
			Cre01.g030950	#N/A	30788414	Cre01.g030950.t1.1	Cre01.g030950.t1.1	PF08617	PTHR15840:SF9,PTHR15840	KOG4066				AT4G34412.1
			Cre01.g030968	#N/A	30789028	Cre01.g030968.t1.1	Cre01.g030968.t1.1
			Cre01.g030986	#N/A	30789412	Cre01.g030986.t1.1	Cre01.g030986.t1.1
			Cre01.g031004	#N/A	30788995	Cre01.g031004.t1.2	Cre01.g031004.t1.2		PTHR14493,PTHR14493:SF7					AT5G12850.1		CCCH-type zinc finger protein with ARM repeat domain
			Cre01.g031050	#N/A	30788604	Cre01.g031050.t1.2	Cre01.g031050.t1.2	PF11942,PF03439	PTHR11125	KOG1999				AT4G08350.1	GTA02,GTA2	global transcription factor group A2
			Cre01.g031050	#N/A	30788605	Cre01.g031050.t2.1	Cre01.g031050.t2.1	PF11942,PF03439	PTHR11125	KOG1999				AT4G08350.1	GTA02,GTA2	global transcription factor group A2
			Cre01.g031100	#N/A	30788807	Cre01.g031100.t1.2	Cre01.g031100.t1.2	PF00595	PTHR17130:SF11,PTHR17130				GO:0005515	AT1G55480.1	ZKT	protein containing PDZ domain, a K-box domain, and a TPR region
			Cre01.g031200	#N/A	30789151	Cre01.g031200.t1.2	Cre01.g031200.t1.2	PF02290	PTHR12013	KOG1761		K03104	GO:0005786,GO:0006614,GO:0008312,GO:0030942	AT2G43640.1		Signal recognition particle, SRP9/SRP14 subunit
			Cre01.g031250	#N/A	30788625	Cre01.g031250.t1.2	Cre01.g031250.t1.2	PF06916	PTHR21377					AT2G20940.1		Protein of unknown function (DUF1279)
			Cre01.g031300	#N/A	30789630	Cre01.g031300.t1.1	Cre01.g031300.t1.1	PF00069	PTHR24347,PTHR24347:SF13	KOG0032			GO:0004672,GO:0005524,GO:0006468	AT5G04870.1	ATCPK1,CPK1	calcium dependent protein kinase 1
			Cre01.g031350	#N/A	30788850	Cre01.g031350.t1.2	Cre01.g031350.t1.2
			Cre01.g031400	#N/A	30789316	Cre01.g031400.t1.2	Cre01.g031400.t1.2
			Cre01.g031450	#N/A	30788792	Cre01.g031450.t1.2	Cre01.g031450.t1.2
			Cre01.g031500	#N/A	30789114	Cre01.g031500.t1.2	Cre01.g031500.t1.2	PF00394,PF07731,PF07732	PTHR11709,PTHR11709:SF15	KOG1263			GO:0016491,GO:0055114,GO:0005507	AT4G39830.1		Cupredoxin superfamily protein
			Cre01.g031550	#N/A	30788327	Cre01.g031550.t1.1	Cre01.g031550.t1.1	PF07282,PF00149	PTHR23257,PTHR23257:SF99	KOG0371			GO:0016787
			Cre01.g031600	#N/A	30789650	Cre01.g031600.t1.2	Cre01.g031600.t1.2	PF05915	PTHR15664	KOG4753				AT2G19350.1		Eukaryotic protein of unknown function (DUF872)
			Cre01.g031650	#N/A	30788757	Cre01.g031650.t1.1	Cre01.g031650.t1.1	PF05637					GO:0016021,GO:0016758	AT4G37690.1		Galactosyl transferase GMA12/MNN10 family protein
			Cre01.g031700	#N/A	30789273	Cre01.g031700.t1.1	Cre01.g031700.t1.1
			Cre01.g031700	#N/A	30789274	Cre01.g031700.t2.1	Cre01.g031700.t2.1
			Cre01.g031700	#N/A	30789275	Cre01.g031700.t3.1	Cre01.g031700.t3.1
			Cre01.g031726	#N/A	30788642	Cre01.g031726.t1.1	Cre01.g031726.t1.1
			Cre01.g031750	#N/A	30788745	Cre01.g031750.t1.2	Cre01.g031750.t1.2	PF08772	PTHR12814			K11883		AT5G41190.1
			Cre01.g031800	#N/A	30789531	Cre01.g031800.t1.1	Cre01.g031800.t1.1	PF08409	PTHR23083,PTHR23083:SF85
			Cre01.g031850	#N/A	30788793	Cre01.g031850.t1.1	Cre01.g031850.t1.1		PTHR10314,PTHR10314:SF29					AT3G26115.1		Pyridoxal-5\'-phosphate-dependent enzyme family protein
			Cre01.g031875	#N/A	30789401	Cre01.g031875.t1.1	Cre01.g031875.t1.1
			Cre01.g031900	#N/A	30789232	Cre01.g031900.t1.1	Cre01.g031900.t1.1	PF03109	PTHR10566:SF23,PTHR10566	KOG1236		K08869		AT1G11390.1		Protein kinase superfamily protein
			Cre01.g031951	#N/A	30788645	Cre01.g031951.t1.1	Cre01.g031951.t1.1
			Cre01.g032000	#N/A	30789470	Cre01.g032000.t1.1	Cre01.g032000.t1.1		PTHR23315					AT5G19330.1	ARIA	ARM repeat protein interacting with ABF2
			Cre01.g032050	#N/A	30789150	Cre01.g032050.t1.2	Cre01.g032050.t1.2	PF08449	PTHR10778,PTHR10778:SF10	KOG1581			GO:0055085	AT2G02810.1	ATUTR1,UTR1	UDP-galactose transporter 1
			Cre01.g032100	#N/A	30789660	Cre01.g032100.t1.1	Cre01.g032100.t1.1	PF00400	PTHR22850:SF2,PTHR22850	KOG1446		K10570		AT1G27840.1	ATCSA-1	Transducin/WD40 repeat-like superfamily protein
			Cre01.g032139	#N/A	30789087	Cre01.g032139.t1.2	Cre01.g032139.t1.2	PF00400	PTHR22850:SF2,PTHR22850					AT1G19750.1		Transducin/WD40 repeat-like superfamily protein
			Cre01.g032150	#N/A	30788368	Cre01.g032150.t1.1	Cre01.g032150.t1.1	PF00400	PTHR22847:SF146,PTHR22847	KOG0643				AT3G49660.1		Transducin/WD40 repeat-like superfamily protein
			Cre01.g032200	#N/A	30789184	Cre01.g032200.t1.2	Cre01.g032200.t1.2
			Cre01.g032250	#N/A	30788667	Cre01.g032250.t1.1	Cre01.g032250.t1.1	PF06047	PTHR13087					AT4G02720.1
			Cre01.g032300	#N/A	30789208	Cre01.g032300.t1.2	Cre01.g032300.t1.2	PF00076	PTHR23003	KOG0105			GO:0003676	AT2G36660.1	PAB7	poly(A) binding protein 7
			Cre01.g032350	#N/A	30788609	Cre01.g032350.t1.2	Cre01.g032350.t1.2	PF07264	PTHR21389			K10134		AT4G06676.1
			Cre01.g032400	#N/A	30789088	Cre01.g032400.t1.2	Cre01.g032400.t1.2
			Cre01.g032450	#N/A	30788403	Cre01.g032450.t1.2	Cre01.g032450.t1.2	PF00839	PTHR11884				GO:0016020
			Cre01.g032500	#N/A	30789692	Cre01.g032500.t1.2	Cre01.g032500.t1.2	PF07719,PF00226,PF00515	PTHR24078:SF56,PTHR24078	KOG0550			GO:0031072,GO:0005515	AT5G03160.1	ATP58IPK,P58IPK	homolog of mamallian P58IPK
			Cre01.g032550	#N/A	30788379	Cre01.g032550.t1.1	Cre01.g032550.t1.1		PTHR12663					AT1G77600.2		ARM repeat superfamily protein
			Cre01.g032600	#N/A	30789391	Cre01.g032600.t1.1	Cre01.g032600.t1.1							AT5G13500.1
			Cre01.g032650	#N/A	30788812	Cre01.g032650.t1.2	Cre01.g032650.t1.2	PF00923	PTHR10683	KOG2772	2.2.1.2	K00616	GO:0005975	AT1G12230.1		Aldolase superfamily protein
			Cre01.g032650	#N/A	30788813	Cre01.g032650.t2.1	Cre01.g032650.t2.1	PF00923	PTHR10683	KOG2772	2.2.1.2	K00616	GO:0005975	AT1G12230.1		Aldolase superfamily protein
			Cre01.g032700	#N/A	30789245	Cre01.g032700.t1.2	Cre01.g032700.t1.2	PF02685					GO:0004340,GO:0005524,GO:0006096,GO:0051156
			Cre01.g032750	#N/A	30789300	Cre01.g032750.t1.2	Cre01.g032750.t1.2							AT4G13200.1
			Cre01.g032800	#N/A	30788906	Cre01.g032800.t1.2	Cre01.g032800.t1.2		PTHR13890	KOG2662				AT5G64560.1	ATMGT9,MGT9,MRS2-2	magnesium transporter 9
			Cre01.g032850	#N/A	30789653	Cre01.g032850.t1.1	Cre01.g032850.t1.1	PF00069	PTHR23257,PTHR23257:SF335	KOG0192			GO:0004672,GO:0005524,GO:0006468	AT3G63260.1	ATMRK1	Protein kinase superfamily protein
			Cre01.g032900	#N/A	30789029	Cre01.g032900.t1.1	Cre01.g032900.t1.1
			Cre01.g032900	#N/A	30789030	Cre01.g032900.t2.1	Cre01.g032900.t2.1
			Cre01.g032900	#N/A	30789031	Cre01.g032900.t3.1	Cre01.g032900.t3.1
			Cre01.g032950	#N/A	30788411	Cre01.g032950.t1.2	Cre01.g032950.t1.2
			Cre01.g033000	#N/A	30789231	Cre01.g033000.t1.2	Cre01.g033000.t1.2
			Cre01.g033050	#N/A	30788648	Cre01.g033050.t1.1	Cre01.g033050.t1.1		PTHR21290:SF13,PTHR21290					AT1G43580.1		Sphingomyelin synthetase family protein
			Cre01.g033071	#N/A	30789203	Cre01.g033071.t1.1	Cre01.g033071.t1.1
			Cre01.g033091	#N/A	30788383	Cre01.g033091.t1.1	Cre01.g033091.t1.1	PF01042,PF01902	PTHR12196	KOG2316				AT3G04480.1		endoribonucleases
			Cre01.g033091	#N/A	30788384	Cre01.g033091.t2.1	Cre01.g033091.t2.1	PF01042,PF01902	PTHR12196	KOG2316				AT3G04480.1		endoribonucleases
			Cre01.g033091	#N/A	30788385	Cre01.g033091.t3.1	Cre01.g033091.t3.1	PF01042,PF01902	PTHR12196	KOG2316				AT3G04480.1		endoribonucleases
			Cre01.g033150	#N/A	30789163	Cre01.g033150.t1.2	Cre01.g033150.t1.2							AT1G70480.1		Domain of unknown function (DUF220)
			Cre01.g033200	#N/A	30788750	Cre01.g033200.t1.2	Cre01.g033200.t1.2
			Cre01.g033250	#N/A	30789185	Cre01.g033250.t1.2	Cre01.g033250.t1.2
			Cre01.g033300	#N/A	30789435	Cre01.g033300.t1.2	Cre01.g033300.t1.2							AT3G62730.1
			Cre01.g033300	#N/A	30789434	Cre01.g033300.t2.1	Cre01.g033300.t2.1							AT3G62730.1
			Cre01.g033350	#N/A	30788675	Cre01.g033350.t1.2	Cre01.g033350.t1.2	PF00171	PTHR11699:SF25,PTHR11699	KOG2454			GO:0008152,GO:0016491,GO:0055114	AT3G66658.2	ALDH22A1	aldehyde dehydrogenase 22A1
			Cre01.g033400	#N/A	30789612	Cre01.g033400.t1.2	Cre01.g033400.t1.2	PF02953	PTHR10898	KOG3479			GO:0006626,GO:0042719,GO:0045039	AT3G46560.1	emb2474,TIM9	Tim10/DDP family zinc finger protein
			Cre01.g033450	#N/A	30789639	Cre01.g033450.t1.2	Cre01.g033450.t1.2
			Cre01.g033500	#N/A	30788862	Cre01.g033500.t1.2	Cre01.g033500.t1.2
			Cre01.g033516	#N/A	30789145	Cre01.g033516.t1.1	Cre01.g033516.t1.1	PF01063					GO:0003824,GO:0008152	AT3G54970.1		D-aminoacid aminotransferase-like PLP-dependent enzymes superfamily protein
			Cre01.g033532	#N/A	30788317	Cre01.g033532.t1.1	Cre01.g033532.t1.1
			Cre01.g033550	#N/A	30788638	Cre01.g033550.t1.2	Cre01.g033550.t1.2	PF07749,PF00085	PTHR18929				GO:0005783,GO:0045454	AT2G47470.1	ATPDI11,ATPDIL2-1,MEE30,PDI11,UNE5	thioredoxin family protein
			Cre01.g033700	#N/A	30788575	Cre01.g033700.t1.2	Cre01.g033700.t1.2	PF01933						AT2G34090.2	MEE18	maternal effect embryo arrest 18
			Cre01.g033750	#N/A	30789514	Cre01.g033750.t1.1	Cre01.g033750.t1.1
			Cre01.g033763	#N/A	30789522	Cre01.g033763.t1.2	Cre01.g033763.t1.2							AT3G54970.1		D-aminoacid aminotransferase-like PLP-dependent enzymes superfamily protein
			Cre01.g033832	#N/A	30788674	Cre01.g033832.t1.1	Cre01.g033832.t1.1	PF00271,PF00270	PTHR24031,PTHR24031:SF103	KOG0331			GO:0003676,GO:0004386,GO:0005524,GO:0008026	AT4G09730.1	RH39	RH39
			Cre01.g033900	#N/A	30788409	Cre01.g033900.t1.1	Cre01.g033900.t1.1	PF03110					GO:0003677,GO:0005634	AT5G43270.1	SPL2	squamosa promoter binding protein-like 2
			Cre01.g033900	#N/A	30788410	Cre01.g033900.t2.1	Cre01.g033900.t2.1	PF03110					GO:0003677,GO:0005634	AT5G43270.1	SPL2	squamosa promoter binding protein-like 2
			Cre01.g033950	#N/A	30789008	Cre01.g033950.t1.1	Cre01.g033950.t1.1	PF06839,PF00929	PTHR23044	KOG0542			GO:0008270	AT3G15140.1		Polynucleotidyl transferase, ribonuclease H-like superfamily protein
			Cre01.g034000	#N/A	30789060	Cre01.g034000.t1.2	Cre01.g034000.t1.2	PF03810,PF02985	PTHR10527:SF1,PTHR10527	KOG1241		K14293	GO:0006886,GO:0008565,GO:0005515	AT5G53480.1		ARM repeat superfamily protein
			Cre01.g034050	#N/A	30788406	Cre01.g034050.t1.2	Cre01.g034050.t1.2	PF00155	PTHR11751,PTHR11751:SF125	KOG0257			GO:0009058,GO:0016769,GO:0030170	AT1G77670.1		Pyridoxal phosphate (PLP)-dependent transferases superfamily protein
			Cre01.g034100	#N/A	30789247	Cre01.g034100.t1.1	Cre01.g034100.t1.1	PF00675	PTHR11851:SF64,PTHR11851	KOG0959			GO:0004222,GO:0006508	AT2G41790.1		Insulinase (Peptidase family M16) family protein
			Cre01.g034100	#N/A	30789248	Cre01.g034100.t2.1	Cre01.g034100.t2.1	PF00675	PTHR11851:SF64,PTHR11851	KOG0959			GO:0004222,GO:0006508	AT2G41790.1		Insulinase (Peptidase family M16) family protein
			Cre01.g034150	#N/A	30789337	Cre01.g034150.t1.1	Cre01.g034150.t1.1	PF00999	PTHR10110:SF7,PTHR10110	KOG1965			GO:0006812,GO:0015299,GO:0016021,GO:0055085	AT1G14660.1	ATNHX8,NHX8	Na+/H+ exchanger 8
			Cre01.g034200	#N/A	30788941	Cre01.g034200.t1.1	Cre01.g034200.t1.1	PF01547,PF00211	PTHR11017				GO:0005215,GO:0006810,GO:0009190,GO:0016849,GO:0035556
			Cre01.g034250	#N/A	30789493	Cre01.g034250.t1.1	Cre01.g034250.t1.1
			Cre01.g034300	#N/A	30788869	Cre01.g034300.t1.2	Cre01.g034300.t1.2
			Cre01.g034325	#N/A	30789635	Cre01.g034325.t1.1	Cre01.g034325.t1.1
			Cre01.g034350	#N/A	30789393	Cre01.g034350.t1.1	Cre01.g034350.t1.1	PF00249	PTHR10641			K09422		AT5G02320.1	ATMYB3R5,MYB3R-5	myb domain protein 3r-5
			Cre01.g034380	#N/A	30788891	Cre01.g034380.t1.2	Cre01.g034380.t1.2							AT1G70650.2		Ran BP2/NZF zinc finger-like superfamily protein
			Cre01.g034400	#N/A	30789251	Cre01.g034400.t1.1	Cre01.g034400.t1.1		PTHR11054	KOG3147	3.1.1.31	K01057		AT5G24400.1	EMB2024,PGL3	NagB/RpiA/CoA transferase-like superfamily protein
			Cre01.g034451	#N/A	30788705	Cre01.g034451.t1.1	Cre01.g034451.t1.1	PF08059,PF00789	PTHR23333,PTHR23333:SF6	KOG2086		K14012	GO:0005515	AT4G04210.1	PUX4	plant UBX domain containing protein 4
			Cre01.g034500	#N/A	30788390	Cre01.g034500.t1.2	Cre01.g034500.t1.2
			Cre01.g034550	#N/A	30789260	Cre01.g034550.t1.2	Cre01.g034550.t1.2
			Cre01.g034600	#N/A	30788928	Cre01.g034600.t1.2	Cre01.g034600.t1.2	PF00400	PTHR22847,PTHR22847:SF10	KOG1036				AT3G09080.1		Transducin/WD40 repeat-like superfamily protein
			Cre01.g034650	#N/A	30789051	Cre01.g034650.t1.2	Cre01.g034650.t1.2							AT1G06590.1
			Cre01.g034700	#N/A	30789569	Cre01.g034700.t1.1	Cre01.g034700.t1.1
			Cre01.g034750	#N/A	30788932	Cre01.g034750.t1.1	Cre01.g034750.t1.1
			Cre01.g034800	#N/A	30788634	Cre01.g034800.t1.1	Cre01.g034800.t1.1		PTHR21477,PTHR21477:SF8					AT3G49790.1		Carbohydrate-binding protein
			Cre01.g034850	#N/A	30788691	Cre01.g034850.t1.1	Cre01.g034850.t1.1
			Cre01.g034875	#N/A	30789124	Cre01.g034875.t1.1	Cre01.g034875.t1.1
			Cre01.g034900	#N/A	30789696	Cre01.g034900.t1.2	Cre01.g034900.t1.2	PF00069	PTHR24351,PTHR24351:SF123	KOG0032			GO:0004672,GO:0005524,GO:0006468	AT2G38910.1	CPK20	calcium-dependent protein kinase 20
			Cre01.g034950	#N/A	30788752	Cre01.g034950.t1.2	Cre01.g034950.t1.2	PF00005	PTHR19211:SF14,PTHR19211	KOG0066		K06184	GO:0005524,GO:0016887	AT3G54540.1	ATGCN4,GCN4	general control non-repressible 4
			Cre01.g035000	#N/A	30789536	Cre01.g035000.t1.2	Cre01.g035000.t1.2	PF00400	PTHR14091	KOG0270				AT4G18905.1		Transducin/WD40 repeat-like superfamily protein
			Cre01.g035050	#N/A	30788946	Cre01.g035050.t1.2	Cre01.g035050.t1.2
			Cre01.g035050	#N/A	30788947	Cre01.g035050.t2.1	Cre01.g035050.t2.1
			Cre01.g035100	#N/A	30789665	Cre01.g035100.t1.2	Cre01.g035100.t1.2	PF00731					GO:0004638,GO:0006189
			Cre01.g035150	#N/A	30788802	Cre01.g035150.t1.1	Cre01.g035150.t1.1	PF00642		KOG1040			GO:0003676,GO:0008270	AT3G19360.1		Zinc finger (CCCH-type) family protein
			Cre01.g035200	#N/A	30788556	Cre01.g035200.t1.2	Cre01.g035200.t1.2	PF01529	PTHR22883				GO:0008270	AT3G56930.1		DHHC-type zinc finger family protein
			Cre01.g035250	#N/A	30789374	Cre01.g035250.t1.2	Cre01.g035250.t1.2
			Cre01.g035300	#N/A	30788785	Cre01.g035300.t1.2	Cre01.g035300.t1.2	PF00795	PTHR23088	KOG0806			GO:0006807,GO:0016810	AT2G27450.1	ATNLP1,CPA,NLP1	nitrilase-like protein 1
			Cre01.g035350	#N/A	30789222	Cre01.g035350.t1.2	Cre01.g035350.t1.2	PF00107,PF08240	PTHR11695,PTHR11695:SF15	KOG0025	1.3.1.38	K07512	GO:0008270,GO:0016491,GO:0055114	AT3G45770.1		Polyketide synthase, enoylreductase family protein
			Cre01.g035400	#N/A	30788640	Cre01.g035400.t1.1	Cre01.g035400.t1.1	PF00097	PTHR15898:SF4,PTHR15898	KOG4172				AT1G18660.4		zinc finger (C3HC4-type RING finger) family protein
			Cre01.g035450	#N/A	30789068	Cre01.g035450.t1.2	Cre01.g035450.t1.2	PF01027	PTHR23291,PTHR23291:SF15	KOG2322		K06890		AT1G03070.1		Bax inhibitor-1 family protein
			Cre01.g035500	#N/A	30788401	Cre01.g035500.t1.2	Cre01.g035500.t1.2	PF00792,PF00454,PF00613	PTHR10048,PTHR10048:SF7	KOG0906	2.7.1.137	K00914	GO:0004428,GO:0046854,GO:0048015,GO:0005942,GO:0016303,GO:0016773	AT1G60490.1	ATVPS34,PI3K,VPS34	vacuolar protein sorting 34
			Cre01.g035550	#N/A	30789220	Cre01.g035550.t1.1	Cre01.g035550.t1.1
			Cre01.g035600	#N/A	30789700	Cre01.g035600.t1.1	Cre01.g035600.t1.1	PF00924					GO:0016020,GO:0055085	AT4G00290.1		Mechanosensitive ion channel protein
			Cre01.g035650	#N/A	30789143	Cre01.g035650.t1.2	Cre01.g035650.t1.2
			Cre01.g035700	#N/A	30789510	Cre01.g035700.t1.2	Cre01.g035700.t1.2
			Cre01.g035750	#N/A	30788754	Cre01.g035750.t1.2	Cre01.g035750.t1.2	PF00924					GO:0016020,GO:0055085	AT4G00290.1		Mechanosensitive ion channel protein
			Cre01.g035800	#N/A	30789236	Cre01.g035800.t1.2	Cre01.g035800.t1.2	PF01007	PTHR11767:SF34,PTHR11767	KOG3827			GO:0005242,GO:0006813,GO:0016020
			Cre01.g035850	#N/A	30788608	Cre01.g035850.t1.2	Cre01.g035850.t1.2	PF04810,PF04811,PF08033,PF04815	PTHR13803	KOG1984			GO:0006886,GO:0006888,GO:0008270,GO:0030127	AT3G44340.1	CEF	clone eighty-four
			Cre01.g035900	#N/A	30789284	Cre01.g035900.t1.1	Cre01.g035900.t1.1
			Cre01.g035950	#N/A	30788507	Cre01.g035950.t1.1	Cre01.g035950.t1.1	PF01740,PF00027,PF00916					GO:0005215,GO:0006810,GO:0016021,GO:0055085
			Cre01.g036000	#N/A	30788966	Cre01.g036000.t1.1	Cre01.g036000.t1.1	PF00069	PTHR24349,PTHR24349:SF128	KOG0032			GO:0004672,GO:0005524,GO:0006468	AT1G76040.2	CPK29	calcium-dependent protein kinase 29
			Cre01.g036050	#N/A	30789431	Cre01.g036050.t1.1	Cre01.g036050.t1.1	PF01119,PF02518	PTHR10073,PTHR10073:SF11	KOG1979		K08734	GO:0005524,GO:0006298,GO:0030983,GO:0005634	AT4G09140.1	ATMLH1,MLH1	MUTL-homologue 1
			Cre01.g036100	#N/A	30788803	Cre01.g036100.t1.1	Cre01.g036100.t1.1	PF00400	PTHR22852	KOG0271		K11790		AT3G27640.1		Transducin/WD40 repeat-like superfamily protein
			Cre01.g036150	#N/A	30788516	Cre01.g036150.t1.2	Cre01.g036150.t1.2							AT5G44090.1		Calcium-binding EF-hand family protein
			Cre01.g036200	#N/A	30789108	Cre01.g036200.t1.2	Cre01.g036200.t1.2	PF07228,PF01477	PTHR12320	KOG1379			GO:0003824,GO:0005515	AT4G16580.1		Protein phosphatase 2C family protein
			Cre01.g036250	#N/A	30788491	Cre01.g036250.t1.2	Cre01.g036250.t1.2	PF00069	PTHR24349:SF67,PTHR24349	KOG0032			GO:0004672,GO:0005524,GO:0006468	AT5G39440.1	SnRK1.3	SNF1-related protein kinase 1.3
			Cre01.g036300	#N/A	30789655	Cre01.g036300.t1.1	Cre01.g036300.t1.1	PF01753	PTHR13244				GO:0008270	AT2G24640.1	UBP19	ubiquitin-specific protease 19
			Cre01.g036350	#N/A	30788694	Cre01.g036350.t1.1	Cre01.g036350.t1.1	PF00689,PF00702,PF00690,PF00122	PTHR24093,PTHR24093:SF73	KOG0204			GO:0006754,GO:0006812,GO:0015662,GO:0016020,GO:0003824,GO:0008152,GO:0000166,GO:0046872	AT5G57110.1	ACA8,AT-ACA8	autoinhibited Ca2+ -ATPase, isoform 8
			Cre01.g036400	#N/A	30788437	Cre01.g036400.t1.2	Cre01.g036400.t1.2	PF00106	PTHR24322:SF42,PTHR24322	KOG1205	1.-.-.-	K00540	GO:0008152,GO:0016491	AT3G03330.1		NAD(P)-binding Rossmann-fold superfamily protein
			Cre01.g036451	#N/A	30788919	Cre01.g036451.t1.1	Cre01.g036451.t1.1
			Cre01.g036500	#N/A	30789346	Cre01.g036500.t1.2	Cre01.g036500.t1.2
			Cre01.g036500	#N/A	30789347	Cre01.g036500.t2.1	Cre01.g036500.t2.1
			Cre01.g036550	#N/A	30788541	Cre01.g036550.t1.2	Cre01.g036550.t1.2	PF03311	PTHR12290:SF8,PTHR12290	KOG2729			GO:0016020,GO:0035556	AT1G12340.1		Cornichon family protein
			Cre01.g036600	#N/A	30789506	Cre01.g036600.t1.2	Cre01.g036600.t1.2	PF00929	PTHR12801					AT5G67240.1	SDN3	small RNA degrading nuclease 3
			Cre01.g036650	#N/A	30788902	Cre01.g036650.t1.1	Cre01.g036650.t1.1	PF00069	PTHR24351,PTHR24351:SF123	KOG0032			GO:0004672,GO:0005524,GO:0006468	AT3G53930.2		Protein kinase superfamily protein
			Cre01.g036700	#N/A	30789498	Cre01.g036700.t1.2	Cre01.g036700.t1.2	PF00069	PTHR24351,PTHR24351:SF123	KOG0032			GO:0004672,GO:0005524,GO:0006468	AT1G54960.1	ANP2,MAPKKK2,NP2	NPK1-related protein kinase 2
			Cre01.g036750	#N/A	30788514	Cre01.g036750.t1.2	Cre01.g036750.t1.2	PF05175	PTHR18895:SF8,PTHR18895	KOG3191			GO:0008168	AT3G13440.1		S-adenosyl-L-methionine-dependent methyltransferases superfamily protein
			Cre01.g036800	#N/A	30789295	Cre01.g036800.t1.1	Cre01.g036800.t1.1	PF00225	PTHR24115,PTHR24115:SF181			K10397	GO:0003777,GO:0005524,GO:0007018	AT2G28620.1		P-loop containing nucleoside triphosphate hydrolases superfamily protein
			Cre01.g036850	#N/A	30788352	Cre01.g036850.t1.2	Cre01.g036850.t1.2	PF01619	PTHR13914	KOG0186	1.5.99.8	K00318	GO:0004657,GO:0006537,GO:0006562,GO:0055114	AT5G38710.1		Methylenetetrahydrofolate reductase family protein
			Cre01.g036900	#N/A	30789136	Cre01.g036900.t1.1	Cre01.g036900.t1.1	PF00069	PTHR23257:SF279,PTHR23257	KOG0192			GO:0004672,GO:0005524,GO:0006468	AT5G49470.3		PAS domain-containing protein tyrosine kinase family protein
			Cre01.g036950	#N/A	30789554	Cre01.g036950.t1.2	Cre01.g036950.t1.2	PF02654					GO:0008818,GO:0009236
			Cre01.g037000	#N/A	30789516	Cre01.g037000.t1.1	Cre01.g037000.t1.1	PF00450	PTHR11802,PTHR11802:SF6	KOG1282			GO:0004185,GO:0006508	AT3G10410.1	CPY,SCPL49	SERINE CARBOXYPEPTIDASE-LIKE 49
			Cre01.g037000	#N/A	30789517	Cre01.g037000.t2.1	Cre01.g037000.t2.1	PF00450	PTHR11802,PTHR11802:SF6	KOG1282			GO:0004185,GO:0006508	AT3G10410.1	CPY,SCPL49	SERINE CARBOXYPEPTIDASE-LIKE 49
			Cre01.g037050	#N/A	30788739	Cre01.g037050.t1.2	Cre01.g037050.t1.2	PF00645	PTHR15447				GO:0003677,GO:0008270
			Cre01.g037100	#N/A	30789465	Cre01.g037100.t1.1	Cre01.g037100.t1.1	PF00069	PTHR24347,PTHR24347:SF65	KOG0032			GO:0004672,GO:0005524,GO:0006468	AT5G24430.1		Calcium-dependent protein kinase (CDPK) family protein
			Cre01.g037150	#N/A	30789001	Cre01.g037150.t1.1	Cre01.g037150.t1.1	PF00654	PTHR11689:SF49,PTHR11689				GO:0005247,GO:0006821,GO:0016020,GO:0055085	AT4G35440.1	ATCLC-E,CLC-E,CLCE	chloride channel E
			Cre01.g037200	#N/A	30789579	Cre01.g037200.t1.2	Cre01.g037200.t1.2
			Cre01.g037250	#N/A	30788457	Cre01.g037250.t1.2	Cre01.g037250.t1.2
			Cre01.g037300	#N/A	30789103	Cre01.g037300.t1.2	Cre01.g037300.t1.2
			Cre01.g037300	#N/A	30789104	Cre01.g037300.t2.1	Cre01.g037300.t2.1
			Cre01.g037300	#N/A	30789105	Cre01.g037300.t3.1	Cre01.g037300.t3.1
			Cre01.g037350	#N/A	30788628	Cre01.g037350.t1.1	Cre01.g037350.t1.1		PTHR12655	KOG2763				AT2G30720.1		Thioesterase/thiol ester dehydrase-isomerase superfamily protein
			Cre01.g037400	#N/A	30789223	Cre01.g037400.t1.1	Cre01.g037400.t1.1	PF08231,PF00160	PTHR11071:SF157,PTHR11071	KOG0865	5.2.1.8	K01802	GO:0003755,GO:0006457	AT5G58710.1	ROC7	rotamase CYP 7
			Cre01.g037450	#N/A	30789474	Cre01.g037450.t1.1	Cre01.g037450.t1.1
			Cre01.g037476	#N/A	30789475	Cre01.g037476.t1.1	Cre01.g037476.t1.1
			Cre01.g037500	#N/A	30788586	Cre01.g037500.t1.2	Cre01.g037500.t1.2	PF00240					GO:0005515	AT1G55060.1	UBQ12	ubiquitin 12
			Cre01.g037550	#N/A	30789673	Cre01.g037550.t1.1	Cre01.g037550.t1.1
			Cre01.g037600	#N/A	30788717	Cre01.g037600.t1.1	Cre01.g037600.t1.1		PTHR19353,PTHR19353:SF7
			Cre01.g037650	#N/A	30788547	Cre01.g037650.t1.2	Cre01.g037650.t1.2		PTHR19353,PTHR19353:SF7					AT3G25545.1
			Cre01.g037700	#N/A	30788905	Cre01.g037700.t1.2	Cre01.g037700.t1.2	PF00173,PF00487	PTHR19353,PTHR19353:SF7	KOG4232			GO:0020037,GO:0006629,GO:0016491,GO:0055114	AT2G46210.1		Fatty acid/sphingolipid desaturase
			Cre01.g037751	#N/A	30788599	Cre01.g037751.t1.1	Cre01.g037751.t1.1
			Cre01.g037800	#N/A	30789056	Cre01.g037800.t1.2	Cre01.g037800.t1.2	PF00085	PTHR21148,PTHR21148:SF11	KOG1672			GO:0045454	AT2G18990.1	TXND9	thioredoxin domain-containing protein 9 homolog
			Cre01.g037850	#N/A	30788900	Cre01.g037850.t1.1	Cre01.g037850.t1.1	PF00364						AT3G15690.2		Single hybrid motif superfamily protein
			Cre01.g037900	#N/A	30789134	Cre01.g037900.t1.1	Cre01.g037900.t1.1		PTHR24772,PTHR24772:SF96					AT4G37020.1
			Cre01.g037950	#N/A	30788903	Cre01.g037950.t1.1	Cre01.g037950.t1.1
			Cre01.g038000	#N/A	30788478	Cre01.g038000.t1.1	Cre01.g038000.t1.1	PF05773,PF03129,PF00069	PTHR11042,PTHR11042:SF9	KOG1936	2.7.11.1	K08282	GO:0005515,GO:0004812,GO:0005524,GO:0006412,GO:0004672,GO:0006468	AT3G59410.1	GCN2	protein kinase family protein
			Cre01.g038050	#N/A	30788425	Cre01.g038050.t1.1	Cre01.g038050.t1.1	PF00512,PF00072,PF01036,PF02518	PTHR24423				GO:0000155,GO:0007165,GO:0016020,GO:0000156,GO:0000160,GO:0006355,GO:0005216,GO:0006811,GO:0005524	AT2G17820.1	AHK1,ATHK1,HK1	histidine kinase 1
			Cre01.g038100	#N/A	30789074	Cre01.g038100.t1.2	Cre01.g038100.t1.2	PF01062						AT2G45870.1		Bestrophin-like protein
			Cre01.g038151	#N/A	30788529	Cre01.g038151.t1.1	Cre01.g038151.t1.1	PF00439,PF00004	PTHR23069	KOG0737			GO:0005515,GO:0005524	AT1G05910.1		cell division cycle protein 48-related / CDC48-related
			Cre01.g038200	#N/A	30789477	Cre01.g038200.t1.2	Cre01.g038200.t1.2
			Cre01.g038250	#N/A	30788510	Cre01.g038250.t1.2	Cre01.g038250.t1.2	PF00282	PTHR11999,PTHR11999:SF4	KOG0629	4.1.1.22	K01590	GO:0016831,GO:0019752,GO:0030170	AT1G43710.1	emb1075	Pyridoxal phosphate (PLP)-dependent transferases superfamily protein
			Cre01.g038300	#N/A	30789314	Cre01.g038300.t1.2	Cre01.g038300.t1.2
			Cre01.g038350	#N/A	30788400	Cre01.g038350.t1.1	Cre01.g038350.t1.1
			Cre01.g038376	#N/A	30789356	Cre01.g038376.t1.1	Cre01.g038376.t1.1
			Cre01.g038400	#N/A	30788539	Cre01.g038400.t1.2	Cre01.g038400.t1.2	PF00262	PTHR11073	KOG0674		K08057	GO:0005509	AT1G09210.1	AtCRT1b,CRT1b	calreticulin 1b
			Cre01.g038450	#N/A	30789594	Cre01.g038450.t1.2	Cre01.g038450.t1.2
			Cre01.g038500	#N/A	30788986	Cre01.g038500.t1.2	Cre01.g038500.t1.2	PF00067	PTHR24305	KOG0157			GO:0005506,GO:0009055,GO:0016705,GO:0020037	AT1G31800.1	CYP97A3,LUT5	cytochrome P450, family 97, subfamily A, polypeptide 3
			Cre01.g038550	#N/A	30789073	Cre01.g038550.t1.1	Cre01.g038550.t1.1	PF00534	PTHR12526,PTHR12526:SF168	KOG1111	2.4.1.-	K06119	GO:0009058	AT5G01220.1	SQD2	sulfoquinovosyldiacylglycerol 2
			Cre01.g038600	#N/A	30789324	Cre01.g038600.t1.2	Cre01.g038600.t1.2	PF00487,PF11960	PTHR19353,PTHR19353:SF7		1.14.19.-	K10257	GO:0006629,GO:0016491,GO:0055114,GO:0016717	AT3G11170.1	FAD7,FADD	fatty acid desaturase 7
			Cre01.g038650	#N/A	30788508	Cre01.g038650.t1.2	Cre01.g038650.t1.2	PF00076	PTHR23147	KOG0113			GO:0003676	AT3G13570.1	SCL30A	SC35-like splicing factor 30A
			Cre01.g038700	#N/A	30789456	Cre01.g038700.t1.2	Cre01.g038700.t1.2	PF00571,PF00654	PTHR11689:SF11,PTHR11689	KOG0474			GO:0005515,GO:0005247,GO:0006821,GO:0016020,GO:0055085	AT5G26240.1	ATCLC-D,CLC-D	chloride channel D
			Cre01.g038750	#N/A	30789647	Cre01.g038750.t1.2	Cre01.g038750.t1.2
			Cre01.g038800	#N/A	30789430	Cre01.g038800.t1.2	Cre01.g038800.t1.2	PF00230	PTHR19139,PTHR19139:SF3	KOG0223			GO:0005215,GO:0006810,GO:0016020	AT5G18290.1	SIP1;2,SIP1B	Aquaporin-like superfamily protein
			Cre01.g038850	#N/A	30788684	Cre01.g038850.t1.1	Cre01.g038850.t1.1	PF00076,PF02037	PTHR24012:SF260,PTHR24012	KOG4211			GO:0003676	AT4G34110.1	ATPAB2,PAB2,PABP2	poly(A) binding protein 2
			Cre01.g038900	#N/A	30788771	Cre01.g038900.t1.1	Cre01.g038900.t1.1	PF12146	PTHR11614,PTHR11614:SF28	KOG1455				AT1G73480.1		alpha/beta-Hydrolases superfamily protein
			Cre01.g038950	#N/A	30789410	Cre01.g038950.t1.2	Cre01.g038950.t1.2	PF08806	PTHR13077,PTHR13077:SF5	KOG3384				AT1G05720.1		selenoprotein family protein
			Cre01.g039000	#N/A	30788751	Cre01.g039000.t1.1	Cre01.g039000.t1.1
			Cre01.g039050	#N/A	30788494	Cre01.g039050.t1.1	Cre01.g039050.t1.1
			Cre01.g039101	#N/A	30788884	Cre01.g039101.t1.1	Cre01.g039101.t1.1	PF07282	PTHR23257,PTHR23257:SF99
			Cre01.g039150	#N/A	30789697	Cre01.g039150.t1.2	Cre01.g039150.t1.2	PF09685						AT2G47840.1		Uncharacterised conserved protein ycf60
			Cre01.g039200	#N/A	30789550	Cre01.g039200.t1.2	Cre01.g039200.t1.2	PF00025	PTHR24073,PTHR24073:SF492			K07935	GO:0005525	AT4G09720.1	ATRABG3A,RABG3A	RAB GTPase homolog G3A
			Cre01.g039250	#N/A	30788560	Cre01.g039250.t1.1	Cre01.g039250.t1.1	PF03719,PF00333	PTHR13718,PTHR13718:SF4	KOG0877		K02981	GO:0003735,GO:0005622,GO:0005840,GO:0006412,GO:0003723	AT2G41840.1		Ribosomal protein S5 family protein
			Cre01.g039250	#N/A	30788561	Cre01.g039250.t2.1	Cre01.g039250.t2.1	PF03719,PF00333	PTHR13718,PTHR13718:SF4	KOG0877		K02981	GO:0003735,GO:0005622,GO:0005840,GO:0006412,GO:0003723	AT2G41840.1		Ribosomal protein S5 family protein
			Cre01.g039300	#N/A	30789032	Cre01.g039300.t1.2	Cre01.g039300.t1.2	PF00076,PF00658	PTHR24011,PTHR24011:SF69	KOG0123		K13126	GO:0003676,GO:0003723	AT4G34110.1	ATPAB2,PAB2,PABP2	poly(A) binding protein 2
			Cre01.g039350	#N/A	30788565	Cre01.g039350.t1.2	Cre01.g039350.t1.2	PF00667,PF00175,PF00258	PTHR19384,PTHR19384:SF17	KOG1158	1.6.2.4	K00327	GO:0016491,GO:0055114,GO:0010181	AT4G24520.1	AR1,ATR1	P450 reductase 1
			Cre01.g039400	#N/A	30789534	Cre01.g039400.t1.1	Cre01.g039400.t1.1	PF00561	PTHR10992,PTHR10992:SF52	KOG4178				AT1G80280.1		alpha/beta-Hydrolases superfamily protein
			Cre01.g039450	#N/A	30789083	Cre01.g039450.t1.1	Cre01.g039450.t1.1	PF12263
			Cre01.g039500	#N/A	30789378	Cre01.g039500.t1.2	Cre01.g039500.t1.2	PF00400,PF05729	PTHR22847:SF185,PTHR22847	KOG0319				AT5G16750.1	TOZ	Transducin family protein / WD-40 repeat family protein
			Cre01.g039550	#N/A	30788896	Cre01.g039550.t1.1	Cre01.g039550.t1.1	PF04755					GO:0005198,GO:0009507	AT2G46910.1		Plastid-lipid associated protein PAP / fibrillin family protein
			Cre01.g039600	#N/A	30789225	Cre01.g039600.t1.1	Cre01.g039600.t1.1		PTHR18460:SF3,PTHR18460					AT1G79190.1		ARM repeat superfamily protein
			Cre01.g039626	#N/A	30788649	Cre01.g039626.t1.1	Cre01.g039626.t1.1
			Cre01.g039650	#N/A	30789419	Cre01.g039650.t1.2	Cre01.g039650.t1.2	PF01327	PTHR10458				GO:0005506,GO:0006412,GO:0042586	AT5G14660.1	ATDEF2,DEF2,PDF1B	peptide deformylase 1B
			Cre01.g039702	#N/A	30788490	Cre01.g039702.t1.1	Cre01.g039702.t1.1
			Cre01.g039750	#N/A	30788696	Cre01.g039750.t1.2	Cre01.g039750.t1.2	PF01327	PTHR10458		3.5.1.88	K01462	GO:0005506,GO:0006412,GO:0042586	AT5G14660.1	ATDEF2,DEF2,PDF1B	peptide deformylase 1B
			Cre01.g039800	#N/A	30789691	Cre01.g039800.t1.1	Cre01.g039800.t1.1
			Cre01.g039850	#N/A	30788762	Cre01.g039850.t1.1	Cre01.g039850.t1.1	PF00294,PF03641	PTHR10584:SF26,PTHR10584	KOG2854				AT1G50575.1		Putative lysine decarboxylase family protein
			Cre01.g039900	#N/A	30788344	Cre01.g039900.t1.2	Cre01.g039900.t1.2	PF00753	PTHR12553:SF3,PTHR12553	KOG2121	3.1.26.11	K00784	GO:0016787	AT3G16260.1	TRZ4	tRNAse Z4
			Cre01.g039950	#N/A	30789162	Cre01.g039950.t1.2	Cre01.g039950.t1.2	PF06813	PTHR21576	KOG2504				AT5G50520.1		Major facilitator superfamily protein
			Cre01.g040000	#N/A	30788495	Cre01.g040000.t1.2	Cre01.g040000.t1.2	PF00467	PTHR11143	KOG3401		K02898	GO:0003735,GO:0006412,GO:0015934	AT3G49910.1		Translation protein SH3-like family protein
			Cre01.g040050	#N/A	30789112	Cre01.g040050.t1.1	Cre01.g040050.t1.1	PF04263,PF04265	PTHR13622	KOG3153	2.7.6.2	K00949	GO:0004788,GO:0005524,GO:0009229	AT1G02880.3	TPK1	thiamin pyrophosphokinase1
			Cre01.g040100	#N/A	30788476	Cre01.g040100.t1.2	Cre01.g040100.t1.2							AT1G03250.1
			Cre01.g040150	#N/A	30789080	Cre01.g040150.t1.2	Cre01.g040150.t1.2	PF00069	PTHR13902,PTHR13902:SF12	KOG0198			GO:0004672,GO:0005524,GO:0006468	AT1G64630.1	ATWNK10,WNK10	with no lysine (K) kinase 10
			Cre01.g040200	#N/A	30788933	Cre01.g040200.t1.2	Cre01.g040200.t1.2	PF00069	PTHR13902	KOG0198			GO:0004672,GO:0005524,GO:0006468	AT5G41990.1	ATWNK8,WNK8	with no lysine (K) kinase 8
			Cre01.g040250	#N/A	30789567	Cre01.g040250.t1.2	Cre01.g040250.t1.2	PF12572,PF00226	PTHR10509,PTHR10509:SF0	KOG4188			GO:0031072,GO:0008171	AT1G65280.1		DNAJ heat shock N-terminal domain-containing protein
			Cre01.g040300	#N/A	30789487	Cre01.g040300.t1.2	Cre01.g040300.t1.2	PF01596,PF11998	PTHR10509,PTHR10509:SF0				GO:0008171	AT3G62000.2		S-adenosyl-L-methionine-dependent methyltransferases superfamily protein
			Cre01.g040350	#N/A	30789422	Cre01.g040350.t1.1	Cre01.g040350.t1.1	PF00488	PTHR11361,PTHR11361:SF67				GO:0005524,GO:0006298,GO:0030983	AT5G54090.1		DNA mismatch repair protein MutS, type 2
			Cre01.g040379	#N/A	30788967	Cre01.g040379.t1.2	Cre01.g040379.t1.2		PTHR10887					AT5G47010.1	ATUPF1,LBA1,UPF1	RNA helicase, putative
			Cre01.g040400	#N/A	30789620	Cre01.g040400.t1.2	Cre01.g040400.t1.2
			Cre01.g040450	#N/A	30788392	Cre01.g040450.t1.2	Cre01.g040450.t1.2	PF01627		KOG4747		K14490	GO:0000160,GO:0004871	AT1G03430.1	AHP5	histidine-containing phosphotransfer factor 5
			Cre01.g040476	#N/A	30788399	Cre01.g040476.t1.1	Cre01.g040476.t1.1
			Cre01.g040500	#N/A	30789109	Cre01.g040500.t1.2	Cre01.g040500.t1.2		PTHR12603		6.3.2.19	K10643		AT3G48070.1		RING/U-box superfamily protein
			Cre01.g040517	#N/A	30788573	Cre01.g040517.t1.1	Cre01.g040517.t1.1
			Cre01.g040533	#N/A	30789010	Cre01.g040533.t1.1	Cre01.g040533.t1.1
			Cre01.g040550	#N/A	30789418	Cre01.g040550.t1.1	Cre01.g040550.t1.1
			Cre01.g040600	#N/A	30789119	Cre01.g040600.t1.1	Cre01.g040600.t1.1
			Cre01.g040650	#N/A	30789598	Cre01.g040650.t1.1	Cre01.g040650.t1.1	PF06011
			Cre01.g040650	#N/A	30789599	Cre01.g040650.t2.1	Cre01.g040650.t2.1	PF06011
			Cre01.g040650	#N/A	30789600	Cre01.g040650.t3.1	Cre01.g040650.t3.1	PF06011
			Cre01.g040701	#N/A	30789293	Cre01.g040701.t1.1	Cre01.g040701.t1.1
			Cre01.g040750	#N/A	30788377	Cre01.g040750.t1.1	Cre01.g040750.t1.1
			Cre01.g040801	#N/A	30788524	Cre01.g040801.t1.1	Cre01.g040801.t1.1
			Cre01.g040850	#N/A	30789298	Cre01.g040850.t1.2	Cre01.g040850.t1.2	PF06011
			Cre01.g040850	#N/A	30789299	Cre01.g040850.t2.1	Cre01.g040850.t2.1
			Cre01.g040900	#N/A	30788688	Cre01.g040900.t1.1	Cre01.g040900.t1.1
			Cre01.g040950	#N/A	30789447	Cre01.g040950.t1.2	Cre01.g040950.t1.2	PF02816	PTHR14187,PTHR14187:SF3				GO:0004674,GO:0005524,GO:0006468
			Cre01.g041000	#N/A	30788577	Cre01.g041000.t1.1	Cre01.g041000.t1.1			KOG3450				AT3G06610.1		DNA-binding enhancer protein-related
			Cre01.g041050	#N/A	30788824	Cre01.g041050.t1.1	Cre01.g041050.t1.1	PF00324	PTHR11785,PTHR11785:SF53	KOG1286			GO:0006810,GO:0016020,GO:0055085,GO:0003333,GO:0015171	AT4G21120.1	AAT1,CAT1	amino acid transporter 1
			Cre01.g041050	#N/A	30788825	Cre01.g041050.t2.1	Cre01.g041050.t2.1	PF00324	PTHR11785,PTHR11785:SF53	KOG1286			GO:0006810,GO:0016020,GO:0055085,GO:0003333,GO:0015171	AT4G21120.1	AAT1,CAT1	amino acid transporter 1
			Cre01.g041100	#N/A	30788888	Cre01.g041100.t1.1	Cre01.g041100.t1.1	PF00856	PTHR12197:SF88,PTHR12197				GO:0005515	AT3G21820.1	ATXR2,SDG36	histone-lysine N-methyltransferase ATXR2
			Cre01.g041150	#N/A	30789141	Cre01.g041150.t1.1	Cre01.g041150.t1.1
			Cre01.g041200	#N/A	30788744	Cre01.g041200.t1.1	Cre01.g041200.t1.1			KOG1003
			Cre01.g041256	#N/A	30789376	Cre01.g041256.t1.2	Cre01.g041256.t1.2
			Cre01.g041256	#N/A	30789377	Cre01.g041256.t2.1	Cre01.g041256.t2.1
			Cre01.g041300	#N/A	30788924	Cre01.g041300.t1.2	Cre01.g041300.t1.2	PF04922	PTHR12989,PTHR12989:SF10	KOG2642	2.4.1.-	K03850	GO:0016021,GO:0016758	AT5G02410.1		DIE2/ALG10 family
			Cre01.g041351	#N/A	30789387	Cre01.g041351.t1.1	Cre01.g041351.t1.1	PF10238	PTHR15967					AT5G08320.1
			Cre01.g041400	#N/A	30788769	Cre01.g041400.t1.1	Cre01.g041400.t1.1
			Cre01.g041426	#N/A	30789258	Cre01.g041426.t1.1	Cre01.g041426.t1.1
			Cre01.g041450	#N/A	30788328	Cre01.g041450.t1.1	Cre01.g041450.t1.1	PF00481	PTHR13832,PTHR13832:SF116	KOG0698			GO:0003824	AT2G20050.1		protein serine/threonine phosphatases;protein kinases;catalytics;cAMP-dependent protein kinase regulators;ATP binding;protein serine/threonine phosphatases
			Cre01.g041500	#N/A	30789067	Cre01.g041500.t1.1	Cre01.g041500.t1.1			KOG2186
			Cre01.g041550	#N/A	30788881	Cre01.g041550.t1.1	Cre01.g041550.t1.1	PF07714	PTHR23257				GO:0004672,GO:0006468	AT3G46920.1		Protein kinase superfamily protein with octicosapeptide/Phox/Bem1p domain
			Cre01.g041583	#N/A	30789668	Cre01.g041583.t1.1	Cre01.g041583.t1.1	PF03366	PTHR23195				GO:0005634,GO:0006355	AT2G18000.2	TAF14	TBP-associated factor 14
			Cre01.g041583	#N/A	30789669	Cre01.g041583.t2.1	Cre01.g041583.t2.1
			Cre01.g041650	#N/A	30788670	Cre01.g041650.t1.1	Cre01.g041650.t1.1
			Cre01.g041650	#N/A	30788671	Cre01.g041650.t2.1	Cre01.g041650.t2.1
			Cre01.g041667	#N/A	30789459	Cre01.g041667.t1.1	Cre01.g041667.t1.1
			Cre01.g041667	#N/A	30789460	Cre01.g041667.t2.1	Cre01.g041667.t2.1
			Cre01.g041700	#N/A	30788334	Cre01.g041700.t1.2	Cre01.g041700.t1.2
			Cre01.g041752	#N/A	30788555	Cre01.g041752.t1.1	Cre01.g041752.t1.1		PTHR11584:SF253,PTHR11584
			Cre01.g041800	#N/A	30789508	Cre01.g041800.t1.2	Cre01.g041800.t1.2	PF00069	PTHR26263,PTHR26263:SF9				GO:0004672,GO:0005524,GO:0006468	AT5G51800.1		Protein kinase superfamily protein
			Cre01.g041800	#N/A	30789507	Cre01.g041800.t2.1	Cre01.g041800.t2.1	PF00069	PTHR26263,PTHR26263:SF9				GO:0004672,GO:0005524,GO:0006468	AT5G51800.1		Protein kinase superfamily protein
			Cre01.g041850	#N/A	30788713	Cre01.g041850.t1.1	Cre01.g041850.t1.1		PTHR12270,PTHR12270:SF7	KOG3765		K09668
			Cre01.g041855	#N/A	30789586	Cre01.g041855.t1.2	Cre01.g041855.t1.2	PF00675	PTHR11851:SF64,PTHR11851				GO:0004222,GO:0006508	AT3G57470.1		Insulinase (Peptidase family M16) family protein
			Cre01.g041900	#N/A	30788416	Cre01.g041900.t1.1	Cre01.g041900.t1.1	PF09749	PTHR13522					AT5G51170.1
			Cre01.g041950	#N/A	30789022	Cre01.g041950.t1.2	Cre01.g041950.t1.2
			Cre01.g042000	#N/A	30788386	Cre01.g042000.t1.2	Cre01.g042000.t1.2	PF00612,PF00023		KOG4214			GO:0005515
			Cre01.g042050	#N/A	30789253	Cre01.g042050.t1.2	Cre01.g042050.t1.2	PF01641	PTHR10173:SF0,PTHR10173	KOG0856			GO:0008113,GO:0055114	AT1G53670.1	ATMSRB1,MSRB1	methionine sulfoxide reductase B 1
			Cre01.g042100	#N/A	30788650	Cre01.g042100.t1.2	Cre01.g042100.t1.2			KOG3671
			Cre01.g042150	#N/A	30788982	Cre01.g042150.t1.1	Cre01.g042150.t1.1	PF02517	PTHR13046	KOG4130	3.4.22.-	K08658	GO:0016020	AT2G36305.1	ATFACE-2,ATFACE2,FACE2,RCE1	farnesylated protein-converting enzyme 2
			Cre01.g042200	#N/A	30789411	Cre01.g042200.t1.1	Cre01.g042200.t1.1
			Cre01.g042250	#N/A	30788423	Cre01.g042250.t1.1	Cre01.g042250.t1.1
			Cre01.g042300	#N/A	30789573	Cre01.g042300.t1.1	Cre01.g042300.t1.1	PF00530	PTHR19331,PTHR19331:SF365				GO:0005044,GO:0016020
			Cre01.g042352	#N/A	30788654	Cre01.g042352.t1.1	Cre01.g042352.t1.1	PF00089,PF00530	PTHR19331,PTHR19331:SF418	KOG3592			GO:0004252,GO:0006508,GO:0005044,GO:0016020
			Cre01.g042402	#N/A	30789499	Cre01.g042402.t1.1	Cre01.g042402.t1.1
			Cre01.g042450	#N/A	30789117	Cre01.g042450.t1.1	Cre01.g042450.t1.1
			Cre01.g042502	#N/A	30789402	Cre01.g042502.t1.1	Cre01.g042502.t1.1	PF00089,PF00530	PTHR19331,PTHR19331:SF418	KOG2748			GO:0004252,GO:0006508,GO:0005044,GO:0016020
			Cre01.g042550	#N/A	30789338	Cre01.g042550.t1.1	Cre01.g042550.t1.1	PF07774	PTHR21573	KOG2103				AT5G11560.1		catalytics
			Cre01.g042600	#N/A	30788786	Cre01.g042600.t1.2	Cre01.g042600.t1.2
			Cre01.g042650	#N/A	30789128	Cre01.g042650.t1.2	Cre01.g042650.t1.2
			Cre01.g042700	#N/A	30788335	Cre01.g042700.t1.2	Cre01.g042700.t1.2
			Cre01.g042750	#N/A	30789585	Cre01.g042750.t1.2	Cre01.g042750.t1.2	PF00694,PF00330	PTHR11670,PTHR11670:SF5	KOG0453	4.2.1.3	K01681	GO:0008152,GO:0003994,GO:0006099,GO:0051539	AT4G26970.1	ACO2	aconitase 2
			Cre01.g042800	#N/A	30789170	Cre01.g042800.t1.2	Cre01.g042800.t1.2	PF05368	PTHR14194,PTHR14194:SF15	KOG1203				AT5G18660.1	PCB2	NAD(P)-binding Rossmann-fold superfamily protein
			Cre01.g042850	#N/A	30789385	Cre01.g042850.t1.2	Cre01.g042850.t1.2	PF00173	PTHR10281				GO:0020037	AT3G48890.1	ATMAPR3,ATMP2,MAPR3,MSBP2	membrane-associated progesterone binding protein 3
			Cre01.g042900	#N/A	30789042	Cre01.g042900.t1.2	Cre01.g042900.t1.2	PF00398	PTHR11727	KOG0820	2.1.1.183	K14191	GO:0000154,GO:0000179,GO:0008649	AT2G47420.1		Ribosomal RNA adenine dimethylase family protein
			Cre01.g042950	#N/A	30789007	Cre01.g042950.t1.2	Cre01.g042950.t1.2	PF05255	PTHR13180	KOG3393				AT1G36980.1
			Cre01.g043000	#N/A	30789590	Cre01.g043000.t1.1	Cre01.g043000.t1.1	PF04055					GO:0003824,GO:0051536	AT2G39670.1		Radical SAM superfamily protein
			Cre01.g043050	#N/A	30789380	Cre01.g043050.t1.2	Cre01.g043050.t1.2	PF09335	PTHR12677					AT1G22850.1		SNARE associated Golgi protein family
			Cre01.g043100	#N/A	30788921	Cre01.g043100.t1.2	Cre01.g043100.t1.2	PF01894		KOG3267				AT1G21065.1
			Cre01.g043150	#N/A	30788618	Cre01.g043150.t1.2	Cre01.g043150.t1.2							AT4G36730.2	GBF1	G-box binding factor 1
			Cre01.g043200	#N/A	30788775	Cre01.g043200.t1.2	Cre01.g043200.t1.2							AT3G50685.1
			Cre01.g043250	#N/A	30789077	Cre01.g043250.t1.1	Cre01.g043250.t1.1
			Cre01.g043300	#N/A	30788442	Cre01.g043300.t1.2	Cre01.g043300.t1.2
			Cre01.g043350	#N/A	30789542	Cre01.g043350.t1.2	Cre01.g043350.t1.2	PF08417,PF00355	PTHR21266,PTHR21266:SF19		1.13.12.14	K13600	GO:0010277,GO:0055114,GO:0016491,GO:0051537	AT1G44446.1	ATCAO,CAO,CH1	Pheophorbide a oxygenase family protein with Rieske [2Fe-2S] domain
			Cre01.g043400	#N/A	30789142	Cre01.g043400.t1.2	Cre01.g043400.t1.2							AT5G59210.1		myosin heavy chain-related
			Cre01.g043450	#N/A	30788632	Cre01.g043450.t1.2	Cre01.g043450.t1.2
			Cre01.g043500	#N/A	30789277	Cre01.g043500.t1.1	Cre01.g043500.t1.1	PF10288	PTHR20882					AT4G35910.1		Adenine nucleotide alpha hydrolases-like superfamily protein
			Cre01.g043550	#N/A	30788943	Cre01.g043550.t1.1	Cre01.g043550.t1.1	PF03110					GO:0003677,GO:0005634	AT1G27370.1	SPL10	squamosa promoter binding protein-like 10
			Cre01.g043600	#N/A	30789414	Cre01.g043600.t1.1	Cre01.g043600.t1.1
			Cre01.g043650	#N/A	30788811	Cre01.g043650.t1.1	Cre01.g043650.t1.1		PTHR22708					AT4G03260.1		Outer arm dynein light chain 1 protein
			Cre01.g043700	#N/A	30788566	Cre01.g043700.t1.2	Cre01.g043700.t1.2	PF10644	PTHR13391	KOG2530				AT4G37190.1
			Cre01.g043750	#N/A	30788837	Cre01.g043750.t1.1	Cre01.g043750.t1.1		PTHR16074,PTHR16074:SF4
			Cre01.g043800	#N/A	30789432	Cre01.g043800.t1.1	Cre01.g043800.t1.1
			Cre01.g043817	#N/A	30789024	Cre01.g043817.t1.1	Cre01.g043817.t1.1
			Cre01.g043817	#N/A	30789025	Cre01.g043817.t2.1	Cre01.g043817.t2.1
			Cre01.g043850	#N/A	30788569	Cre01.g043850.t1.1	Cre01.g043850.t1.1	PF00069	PTHR23257:SF280,PTHR23257	KOG0192			GO:0004672,GO:0005524,GO:0006468	AT5G49470.3		PAS domain-containing protein tyrosine kinase family protein
			Cre01.g043901	#N/A	30789183	Cre01.g043901.t1.1	Cre01.g043901.t1.1
			Cre01.g043950	#N/A	30788760	Cre01.g043950.t1.1	Cre01.g043950.t1.1	PF00069	PTHR26392,PTHR26392:SF98				GO:0004672,GO:0005524,GO:0006468
			Cre01.g043950	#N/A	30788761	Cre01.g043950.t2.1	Cre01.g043950.t2.1	PF00069	PTHR26392,PTHR26392:SF98				GO:0004672,GO:0005524,GO:0006468
			Cre01.g044000	#N/A	30788747	Cre01.g044000.t1.1	Cre01.g044000.t1.1		PTHR13093	KOG3362				AT5G37055.1	ATSWC6,SEF	HIT-type Zinc finger family protein
			Cre01.g044050	#N/A	30789712	Cre01.g044050.t1.2	Cre01.g044050.t1.2	PF05493		KOG3500			GO:0015078,GO:0015991,GO:0033179	AT5G55290.1		ATPase, V0 complex, subunit E
			Cre01.g044100	#N/A	30789318	Cre01.g044100.t1.2	Cre01.g044100.t1.2	PF01373					GO:0000272,GO:0016161	AT2G32290.1	BAM6,BMY5	beta-amylase 6
			Cre01.g044150	#N/A	30788496	Cre01.g044150.t1.1	Cre01.g044150.t1.1	PF05971	PTHR13393		2.1.1.181	K06970	GO:0008168	AT2G21070.1	FIO1	methyltransferases
			Cre01.g044200	#N/A	30788659	Cre01.g044200.t1.2	Cre01.g044200.t1.2
			Cre01.g044250	#N/A	30789091	Cre01.g044250.t1.1	Cre01.g044250.t1.1		PTHR23050:SF89,PTHR23050					AT4G37010.2	CEN2	centrin 2
			Cre01.g044276	#N/A	30789467	Cre01.g044276.t1.1	Cre01.g044276.t1.1
			Cre01.g044300	#N/A	30789194	Cre01.g044300.t1.2	Cre01.g044300.t1.2
			Cre01.g044350	#N/A	30789607	Cre01.g044350.t1.1	Cre01.g044350.t1.1	PF07699
			Cre01.g044400	#N/A	30788663	Cre01.g044400.t1.2	Cre01.g044400.t1.2
			Cre01.g044450	#N/A	30788468	Cre01.g044450.t1.1	Cre01.g044450.t1.1	PF01694					GO:0004252,GO:0016021
			Cre01.g044550	#N/A	30788484	Cre01.g044550.t1.2	Cre01.g044550.t1.2
			Cre01.g044600	#N/A	30789288	Cre01.g044600.t1.2	Cre01.g044600.t1.2		PTHR10774:SF28,PTHR10774	KOG4744				AT1G20080.1	ATSYTB,NTMC2T1.2,NTMC2TYPE1.2,SYT2,SYTB	Calcium-dependent lipid-binding (CaLB domain) family protein
			Cre01.g044650	#N/A	30788681	Cre01.g044650.t1.2	Cre01.g044650.t1.2		PTHR10774:SF28,PTHR10774					AT1G20080.1	ATSYTB,NTMC2T1.2,NTMC2TYPE1.2,SYT2,SYTB	Calcium-dependent lipid-binding (CaLB domain) family protein
			Cre01.g044700	#N/A	30789649	Cre01.g044700.t1.2	Cre01.g044700.t1.2	PF02798,PF00043	PTHR11260,PTHR11260:SF79	KOG0406			GO:0005515	AT5G16710.1	DHAR3	dehydroascorbate reductase 1
			Cre01.g044750	#N/A	30789564	Cre01.g044750.t1.1	Cre01.g044750.t1.1
			Cre01.g044800	#N/A	30789628	Cre01.g044800.t1.2	Cre01.g044800.t1.2	PF01228,PF02901					GO:0003824,GO:0008152,GO:0005737,GO:0006006,GO:0008861
			Cre01.g044850	#N/A	30788853	Cre01.g044850.t1.2	Cre01.g044850.t1.2		PTHR15600:SF1,PTHR15600	KOG4172				AT5G23110.1		Zinc finger, C3HC4 type (RING finger) family protein
			Cre01.g044900	#N/A	30789527	Cre01.g044900.t1.2	Cre01.g044900.t1.2
			Cre01.g044900	#N/A	30789526	Cre01.g044900.t2.1	Cre01.g044900.t2.1
			Cre01.g044950	#N/A	30788718	Cre01.g044950.t1.2	Cre01.g044950.t1.2
			Cre01.g045000	#N/A	30789221	Cre01.g045000.t1.2	Cre01.g045000.t1.2	PF00188	PTHR10334,PTHR10334:SF60					AT4G31470.1		CAP (Cysteine-rich secretory proteins, Antigen 5, and Pathogenesis-related 1 protein) superfamily protein
			Cre01.g045050	#N/A	30788890	Cre01.g045050.t1.2	Cre01.g045050.t1.2
			Cre01.g045100	#N/A	30789636	Cre01.g045100.t1.2	Cre01.g045100.t1.2
			Cre01.g045150	#N/A	30789033	Cre01.g045150.t1.2	Cre01.g045150.t1.2
			Cre01.g045200	#N/A	30788441	Cre01.g045200.t1.1	Cre01.g045200.t1.1	PF06351					GO:0009507,GO:0016853	AT3G25770.1	AOC2	allene oxide cyclase 2
			Cre01.g045350	#N/A	30788994	Cre01.g045350.t1.2	Cre01.g045350.t1.2	PF00560	PTHR24107,PTHR24107:SF9				GO:0005515	AT1G10510.1	emb2004	RNI-like superfamily protein
			Cre01.g045400	#N/A	30789037	Cre01.g045400.t1.1	Cre01.g045400.t1.1	PF07282	PTHR23257,PTHR23257:SF99
			Cre01.g045400	#N/A	30789038	Cre01.g045400.t2.1	Cre01.g045400.t2.1	PF07282	PTHR23257,PTHR23257:SF99
			Cre01.g045400	#N/A	30789039	Cre01.g045400.t3.1	Cre01.g045400.t3.1
			Cre01.g045426	#N/A	30788420	Cre01.g045426.t1.1	Cre01.g045426.t1.1
			Cre01.g045450	#N/A	30788736	Cre01.g045450.t1.2	Cre01.g045450.t1.2
			Cre01.g045500	#N/A	30788639	Cre01.g045500.t1.2	Cre01.g045500.t1.2			KOG0845
			Cre01.g045550	#N/A	30788918	Cre01.g045550.t1.2	Cre01.g045550.t1.2	PF03151	PTHR11132	KOG1441				AT5G46110.4	APE2,TPT	Glucose-6-phosphate/phosphate translocator-related
			Cre01.g045600	#N/A	30788940	Cre01.g045600.t1.1	Cre01.g045600.t1.1	PF00069	PTHR24363	KOG0595			GO:0004672,GO:0005524,GO:0006468	AT1G50240.2	FU	Protein kinase family protein with ARM repeat domain
			Cre01.g045601	#N/A	30789694	Cre01.g045601.t1.2	Cre01.g045601.t1.2	PF00089,PF00530	PTHR19331:SF16,PTHR19331	KOG3627		K13912	GO:0004252,GO:0006508,GO:0005044,GO:0016020
			Cre01.g045640	#N/A	30788904	Cre01.g045640.t1.2	Cre01.g045640.t1.2	PF00294	PTHR10584:SF21,PTHR10584	KOG2947				AT4G28706.4		pfkB-like carbohydrate kinase family protein
			Cre01.g045650	#N/A	30789484	Cre01.g045650.t1.2	Cre01.g045650.t1.2							AT2G24860.1		DnaJ/Hsp40 cysteine-rich domain superfamily protein
			Cre01.g045700	#N/A	30788702	Cre01.g045700.t1.1	Cre01.g045700.t1.1	PF00141					GO:0004601,GO:0006979,GO:0020037,GO:0055114	AT4G35970.1	APX5	ascorbate peroxidase 5
			Cre01.g045752	#N/A	30789202	Cre01.g045752.t1.1	Cre01.g045752.t1.1
			Cre01.g045800	#N/A	30788887	Cre01.g045800.t1.1	Cre01.g045800.t1.1
			Cre01.g045825	#N/A	30789066	Cre01.g045825.t1.1	Cre01.g045825.t1.1
			Cre01.g045850	#N/A	30788778	Cre01.g045850.t1.1	Cre01.g045850.t1.1	PF00665,PF07727	PTHR11439				GO:0003677,GO:0015074	AT4G23160.1	CRK8	cysteine-rich RLK (RECEPTOR-like protein kinase) 8
			Cre01.g045902	#N/A	30789449	Cre01.g045902.t1.1	Cre01.g045902.t1.1	PF10609,PF01883,PF06155	PTHR23264,PTHR23264:SF3	KOG3022			GO:0055114	AT3G24430.1	HCF101	ATP binding
			Cre01.g045903	#N/A	30789334	Cre01.g045903.t1.1	Cre01.g045903.t1.1	PF03062	PTHR10408		2.3.1.20,2.3.1.75,2.3.1.76	K11155		AT2G19450.1	ABX45,AS11,ATDGAT,DGAT1,RDS1,TAG1	membrane bound O-acyl transferase (MBOAT) family protein
			Cre01.g045950	#N/A	30788477	Cre01.g045950.t1.1	Cre01.g045950.t1.1
			Cre01.g046052	#N/A	30789267	Cre01.g046052.t1.1	Cre01.g046052.t1.1	PF00069	PTHR24347,PTHR24347:SF65				GO:0004672,GO:0005524,GO:0006468
			Cre01.g046150	#N/A	30789301	Cre01.g046150.t1.1	Cre01.g046150.t1.1	PF00557,PF05195	PTHR10804:SF8,PTHR10804	KOG2414	3.4.11.9	K01262	GO:0009987,GO:0004177,GO:0030145	AT1G09300.1		Metallopeptidase M24 family protein
			Cre01.g046237	#N/A	30788511	Cre01.g046237.t1.1	Cre01.g046237.t1.1	PF00176,PF00271	PTHR10799,PTHR10799:SF133	KOG1002			GO:0003677,GO:0005524,GO:0003676,GO:0004386	AT3G20010.1		SNF2 domain-containing protein / helicase domain-containing protein / zinc finger protein-related
			Cre01.g046237	#N/A	30788512	Cre01.g046237.t2.1	Cre01.g046237.t2.1	PF00176,PF00271	PTHR10799,PTHR10799:SF133	KOG1002			GO:0003677,GO:0005524,GO:0003676,GO:0004386	AT3G20010.1		SNF2 domain-containing protein / helicase domain-containing protein / zinc finger protein-related
			Cre01.g046250	#N/A	30788931	Cre01.g046250.t1.2	Cre01.g046250.t1.2
			Cre01.g046324	#N/A	30789178	Cre01.g046324.t1.1	Cre01.g046324.t1.1
			Cre01.g046450	#N/A	30788446	Cre01.g046450.t1.2	Cre01.g046450.t1.2
			Cre01.g046500	#N/A	30788365	Cre01.g046500.t1.2	Cre01.g046500.t1.2
			Cre01.g046501	#N/A	30788690	Cre01.g046501.t1.1	Cre01.g046501.t1.1
			Cre01.g046502	#N/A	30789604	Cre01.g046502.t1.1	Cre01.g046502.t1.1
			Cre01.g046600	#N/A	30788689	Cre01.g046600.t1.1	Cre01.g046600.t1.1
			Cre01.g046650	#N/A	30788548	Cre01.g046650.t1.2	Cre01.g046650.t1.2
			Cre01.g046652	#N/A	30789622	Cre01.g046652.t1.1	Cre01.g046652.t1.1	PF01588	PTHR11586,PTHR11586:SF4				GO:0000049	AT3G59980.1		Nucleic acid-binding, OB-fold-like protein
			Cre01.g046800	#N/A	30788651	Cre01.g046800.t1.1	Cre01.g046800.t1.1
			Cre01.g046850	#N/A	30788652	Cre01.g046850.t1.2	Cre01.g046850.t1.2	PF00179,PF00627	PTHR24067:SF28,PTHR24067	KOG0418	6.3.2.19	K04649	GO:0016881,GO:0005515	AT5G50870.1	UBC27	ubiquitin-conjugating enzyme 27
			Cre01.g046950	#N/A	30788740	Cre01.g046950.t1.2	Cre01.g046950.t1.2
			Cre01.g047001	#N/A	30789680	Cre01.g047001.t1.1	Cre01.g047001.t1.1
			Cre01.g047050	#N/A	30789707	Cre01.g047050.t1.2	Cre01.g047050.t1.2
			Cre01.g047100	#N/A	30788901	Cre01.g047100.t1.1	Cre01.g047100.t1.1
			Cre01.g047200	#N/A	30789309	Cre01.g047200.t1.1	Cre01.g047200.t1.1
			Cre01.g047200	#N/A	30789310	Cre01.g047200.t2.1	Cre01.g047200.t2.1
			Cre01.g047218	#N/A	30789283	Cre01.g047218.t1.2	Cre01.g047218.t1.2	PF10184						AT1G16320.1		Uncharacterized conserved protein (DUF2358)
			Cre01.g047229	#N/A	30789339	Cre01.g047229.t1.2	Cre01.g047229.t1.2	PF05600	PTHR14894	KOG2607				AT5G06830.1
			Cre01.g047265	#N/A	30788552	Cre01.g047265.t1.1	Cre01.g047265.t1.1	PF12499		KOG0487
			Cre01.g047300	#N/A	30789179	Cre01.g047300.t1.2	Cre01.g047300.t1.2
			Cre01.g047350	#N/A	30789055	Cre01.g047350.t1.1	Cre01.g047350.t1.1
			Cre01.g047400	#N/A	30788963	Cre01.g047400.t1.1	Cre01.g047400.t1.1
			Cre01.g047450	#N/A	30789502	Cre01.g047450.t1.1	Cre01.g047450.t1.1	PF02338	PTHR12419					AT3G57810.2		Cysteine proteinases superfamily protein
			Cre01.g047500	#N/A	30788729	Cre01.g047500.t1.2	Cre01.g047500.t1.2	PF00560	PTHR23155:SF251,PTHR23155	KOG0472			GO:0005515	AT3G26500.1	PIRL2	plant intracellular ras group-related LRR 2
			Cre01.g047550	#N/A	30788719	Cre01.g047550.t1.2	Cre01.g047550.t1.2	PF00071	PTHR24073,PTHR24073:SF256	KOG0094		K07893		AT2G44610.1	ATRAB6A,ATRABH1B,RAB6,RAB6A	Ras-related small GTP-binding family protein
			Cre01.g047600	#N/A	30788619	Cre01.g047600.t1.2	Cre01.g047600.t1.2	PF00106	PTHR24314,PTHR24314:SF85	KOG0725			GO:0008152,GO:0016491	AT1G24360.1		NAD(P)-binding Rossmann-fold superfamily protein
			Cre01.g047650	#N/A	30789191	Cre01.g047650.t1.2	Cre01.g047650.t1.2		PTHR23125					AT4G15475.1		F-box/RNI-like superfamily protein
			Cre01.g047700	#N/A	30788574	Cre01.g047700.t1.2	Cre01.g047700.t1.2	PF00160	PTHR11071,PTHR11071:SF98	KOG0546	5.2.1.8	K05864	GO:0003755,GO:0006457	AT2G15790.1	CYP40,SQN	peptidyl-prolyl cis-trans isomerase / cyclophilin-40 (CYP40) / rotamase
			Cre01.g047750	#N/A	30789695	Cre01.g047750.t1.2	Cre01.g047750.t1.2	PF01775	PTHR10052,PTHR10052:SF1	KOG0829		K02882	GO:0003735,GO:0005840,GO:0006412	AT2G34480.1		Ribosomal protein L18ae/LX family protein
			Cre01.g047800	#N/A	30788895	Cre01.g047800.t1.1	Cre01.g047800.t1.1	PF00462	PTHR10293,PTHR10293:SF15	KOG1752			GO:0009055,GO:0015035,GO:0045454	AT2G38270.1	ATGRX2,CXIP2	CAX-interacting protein 2
			Cre01.g047850	#N/A	30788436	Cre01.g047850.t1.2	Cre01.g047850.t1.2	PF00155	PTHR11751,PTHR11751:SF25	KOG0259			GO:0009058,GO:0016769,GO:0030170	AT1G77670.1		Pyridoxal phosphate (PLP)-dependent transferases superfamily protein
			Cre01.g047900	#N/A	30788969	Cre01.g047900.t1.1	Cre01.g047900.t1.1		PTHR12085	KOG2562		K11583		AT5G18580.1	EMB40,FASS,FASS 2,FS1,GDO,TON2	tonneau 2 (TON2)
			Cre01.g047950	#N/A	30788506	Cre01.g047950.t1.1	Cre01.g047950.t1.1	PF00071	PTHR24073:SF481,PTHR24073	KOG0079		K07934		AT3G12160.1	ATRABA4D,RABA4D	RAB GTPase homolog A4D
			Cre01.g048000	#N/A	30789135	Cre01.g048000.t1.1	Cre01.g048000.t1.1			KOG0977				AT1G03290.1
			Cre01.g048050	#N/A	30788682	Cre01.g048050.t1.2	Cre01.g048050.t1.2	PF04127	PTHR12290,PTHR12290:SF2	KOG2728	6.3.2.5	K01922		AT5G02080.1		DNA / pantothenate metabolism flavoprotein
			Cre01.g048100	#N/A	30789454	Cre01.g048100.t1.1	Cre01.g048100.t1.1
			Cre01.g048102	#N/A	30788886	Cre01.g048102.t1.2	Cre01.g048102.t1.2
			Cre01.g048150	#N/A	30788391	Cre01.g048150.t1.2	Cre01.g048150.t1.2	PF00565					GO:0003676,GO:0016788	AT2G40410.2		Staphylococcal nuclease homologue
			Cre01.g048200	#N/A	30788746	Cre01.g048200.t1.1	Cre01.g048200.t1.1		PTHR10887,PTHR10887:SF127					AT5G47010.1	ATUPF1,LBA1,UPF1	RNA helicase, putative
			Cre01.g048250	#N/A	30788571	Cre01.g048250.t1.2	Cre01.g048250.t1.2
			Cre01.g048300	#N/A	30789528	Cre01.g048300.t1.1	Cre01.g048300.t1.1
			Cre01.g048350	#N/A	30788733	Cre01.g048350.t1.2	Cre01.g048350.t1.2	PF00150					GO:0004553,GO:0005975	AT4G28320.1		Glycosyl hydrolase superfamily protein
			Cre01.g048400	#N/A	30789086	Cre01.g048400.t1.1	Cre01.g048400.t1.1		PTHR12042,PTHR12042:SF3	KOG0982
			Cre01.g048450	#N/A	30789016	Cre01.g048450.t1.1	Cre01.g048450.t1.1	PF03448
			Cre01.g048501	#N/A	30788485	Cre01.g048501.t1.1	Cre01.g048501.t1.1	PF00651	PTHR24413				GO:0005515	AT1G01640.1		BTB/POZ domain-containing protein
			Cre01.g048550	#N/A	30789094	Cre01.g048550.t1.1	Cre01.g048550.t1.1
			Cre01.g048600	#N/A	30789367	Cre01.g048600.t1.1	Cre01.g048600.t1.1							AT2G39910.1		ARM repeat superfamily protein
			Cre01.g048650	#N/A	30789570	Cre01.g048650.t1.1	Cre01.g048650.t1.1	PF00069	PTHR24347	KOG0032			GO:0004672,GO:0005524,GO:0006468	AT5G12180.1	CPK17	calcium-dependent protein kinase 17
			Cre01.g048701	#N/A	30788774	Cre01.g048701.t1.1	Cre01.g048701.t1.1			KOG2761				AT1G64720.1	CP5	Polyketide cyclase/dehydrase and lipid transport superfamily protein
			Cre01.g048750	#N/A	30789563	Cre01.g048750.t1.2	Cre01.g048750.t1.2	PF01535	PTHR24015					AT1G63230.1		Tetratricopeptide repeat (TPR)-like superfamily protein
			Cre01.g048800	#N/A	30788942	Cre01.g048800.t1.1	Cre01.g048800.t1.1	PF00583					GO:0008080,GO:0008152
			Cre01.g048850	#N/A	30788319	Cre01.g048850.t1.2	Cre01.g048850.t1.2	PF01388,PF01342					GO:0003677,GO:0005622,GO:0005634	AT3G61740.1	ATX3,SDG14	SET domain protein 14
			Cre01.g048900	#N/A	30788879	Cre01.g048900.t1.1	Cre01.g048900.t1.1	PF00439	PTHR22880:SF79,PTHR22880				GO:0005515	AT3G01770.1	ATBET10,BET10	bromodomain and extraterminal domain protein 10
			Cre01.g048950	#N/A	30789390	Cre01.g048950.t1.2	Cre01.g048950.t1.2	PF00215,PF00156	PTHR19278,PTHR19278:SF21	KOG1377	2.4.2.10,4.1.1.23	K13421	GO:0004590,GO:0006207,GO:0009116	AT3G54470.1		uridine 5\'-monophosphate synthase / UMP synthase (PYRE-F) (UMPS)
			Cre01.g049000	#N/A	30789427	Cre01.g049000.t1.2	Cre01.g049000.t1.2	PF01329	PTHR12599	KOG4073			GO:0006729,GO:0008124	AT5G51110.1		Transcriptional coactivator/pterin dehydratase
			Cre01.g049050	#N/A	30788806	Cre01.g049050.t1.2	Cre01.g049050.t1.2							AT3G27050.1
			Cre01.g049100	#N/A	30788578	Cre01.g049100.t1.1	Cre01.g049100.t1.1							AT3G14590.1	NTMC2T6.2,NTMC2TYPE6.2	Calcium-dependent lipid-binding (CaLB domain) family protein
			Cre01.g049117	#N/A	30789070	Cre01.g049117.t1.1	Cre01.g049117.t1.1
			Cre01.g049132	#N/A	30788455	Cre01.g049132.t1.2	Cre01.g049132.t1.2	PF01582,PF07647	PTHR23315	KOG4224			GO:0004888,GO:0007165,GO:0031224,GO:0045087,GO:0005515	AT2G44900.1	ARABIDILLO-1	ARABIDILLO-1
			Cre01.g049132	#N/A	30788454	Cre01.g049132.t2.1	Cre01.g049132.t2.1	PF01582,PF07647	PTHR23315	KOG4224			GO:0004888,GO:0007165,GO:0031224,GO:0045087,GO:0005515	AT2G44900.1	ARABIDILLO-1	ARABIDILLO-1
			Cre01.g049200	#N/A	30789209	Cre01.g049200.t1.1	Cre01.g049200.t1.1	PF00188	PTHR10334,PTHR10334:SF59	KOG3017				AT2G19990.1	PR-1-LIKE	pathogenesis-related protein-1-like
			Cre01.g049250	#N/A	30788471	Cre01.g049250.t1.2	Cre01.g049250.t1.2
			Cre01.g049300	#N/A	30789102	Cre01.g049300.t1.1	Cre01.g049300.t1.1
			Cre01.g049350	#N/A	30789015	Cre01.g049350.t1.1	Cre01.g049350.t1.1							AT5G05740.1	ATEGY2,EGY2	ethylene-dependent gravitropism-deficient and yellow-green-like 2
			Cre01.g049400	#N/A	30789581	Cre01.g049400.t1.2	Cre01.g049400.t1.2	PF04438	PTHR13483					AT1G04945.2		HIT-type Zinc finger family protein
			Cre01.g049450	#N/A	30788445	Cre01.g049450.t1.2	Cre01.g049450.t1.2							AT3G51610.1
			Cre01.g049500	#N/A	30789276	Cre01.g049500.t1.2	Cre01.g049500.t1.2	PF00116	PTHR22888		1.9.3.1	K02261	GO:0004129,GO:0005507,GO:0016020	ATMG00160.1		cytochrome oxidase 2
			Cre01.g049550	#N/A	30788683	Cre01.g049550.t1.2	Cre01.g049550.t1.2							AT4G11790.1		Pleckstrin homology (PH) domain superfamily protein
			Cre01.g049600	#N/A	30788863	Cre01.g049600.t1.2	Cre01.g049600.t1.2					K02116		AT2G31040.1		ATP synthase protein I -related
			Cre01.g049650	#N/A	30789661	Cre01.g049650.t1.1	Cre01.g049650.t1.1	PF00225	PTHR24115:SF261,PTHR24115				GO:0003777,GO:0005524,GO:0007018	AT1G12430.2	ARK3,PAK	armadillo repeat kinesin 3
			Cre01.g049750	#N/A	30788310	Cre01.g049750.t1.2	Cre01.g049750.t1.2	PF04140					GO:0004671,GO:0006481,GO:0016021	AT5G59500.1		protein C-terminal S-isoprenylcysteine carboxyl O-methyltransferases
			Cre01.g049826	#N/A	30789239	Cre01.g049826.t1.1	Cre01.g049826.t1.1	PF12499
			Cre01.g049900	#N/A	30788726	Cre01.g049900.t1.1	Cre01.g049900.t1.1							AT2G43235.1
			Cre01.g049950	#N/A	30788597	Cre01.g049950.t1.1	Cre01.g049950.t1.1	PF00082	PTHR10795,PTHR10795:SF75				GO:0004252,GO:0006508
			Cre01.g050000	#N/A	30788968	Cre01.g050000.t1.2	Cre01.g050000.t1.2	PF10914						AT2G32380.1		Transmembrane protein 97, predicted
			Cre01.g050050	#N/A	30789589	Cre01.g050050.t1.2	Cre01.g050050.t1.2	PF00023	PTHR15047	KOG1709			GO:0005515	AT5G65860.1		ankyrin repeat family protein
			Cre01.g050100	#N/A	30789106	Cre01.g050100.t1.2	Cre01.g050100.t1.2	PF00278,PF02784	PTHR11482,PTHR11482:SF5	KOG0622	4.1.1.20	K01586	GO:0003824	AT3G14390.1		Pyridoxal-dependent decarboxylase family protein
			Cre01.g050150	#N/A	30788960	Cre01.g050150.t1.1	Cre01.g050150.t1.1	PF00724	PTHR22893,PTHR22893:SF7	KOG0134			GO:0010181,GO:0016491	AT1G09400.1		FMN-linked oxidoreductases superfamily protein
			Cre01.g050200	#N/A	30788362	Cre01.g050200.t1.2	Cre01.g050200.t1.2	PF07282	PTHR23257,PTHR23257:SF99
			Cre01.g050300	#N/A	30789336	Cre01.g050300.t1.1	Cre01.g050300.t1.1
			Cre01.g050316	#N/A	30789195	Cre01.g050316.t1.1	Cre01.g050316.t1.1	PF00297	PTHR11229				GO:0003735,GO:0005622,GO:0005840,GO:0006412	AT2G43030.1		Ribosomal protein L3 family protein
			Cre01.g050316	#N/A	30789196	Cre01.g050316.t2.1	Cre01.g050316.t2.1	PF00297	PTHR11229				GO:0003735,GO:0005622,GO:0005840,GO:0006412	AT2G43030.1		Ribosomal protein L3 family protein
			Cre01.g050350	#N/A	30788758	Cre01.g050350.t1.1	Cre01.g050350.t1.1	PF01694	PTHR22790:SF7,PTHR22790	KOG2632			GO:0004252,GO:0016021	AT3G58460.2	ATRBL15,RBL15	RHOMBOID-like protein 15
			Cre01.g050400	#N/A	30789370	Cre01.g050400.t1.2	Cre01.g050400.t1.2	PF02466		KOG3225			GO:0005743,GO:0008565,GO:0015031	AT5G55510.1		Mitochondrial import inner membrane translocase subunit Tim17/Tim22/Tim23 family protein
			Cre01.g050400	#N/A	30789371	Cre01.g050400.t2.1	Cre01.g050400.t2.1	PF02466					GO:0005743,GO:0008565,GO:0015031	AT5G55510.1		Mitochondrial import inner membrane translocase subunit Tim17/Tim22/Tim23 family protein
			Cre01.g050451	#N/A	30789003	Cre01.g050451.t1.1	Cre01.g050451.t1.1	PF03133	PTHR12241,PTHR12241:SF11				GO:0004835,GO:0006464	AT1G77550.1		tubulin-tyrosine ligases;tubulin-tyrosine ligases
			Cre01.g050500	#N/A	30788972	Cre01.g050500.t1.1	Cre01.g050500.t1.1	PF01535	PTHR24015,PTHR24015:SF207					AT3G04760.1		Pentatricopeptide repeat (PPR-like) superfamily protein
			Cre01.g050550	#N/A	30789417	Cre01.g050550.t1.2	Cre01.g050550.t1.2	PF09360	PTHR13680,PTHR13680:SF10				GO:0043231,GO:0051537	AT5G51720.1		2 iron, 2 sulfur cluster binding
			Cre01.g050600	#N/A	30788517	Cre01.g050600.t1.1	Cre01.g050600.t1.1	PF05063	PTHR13107	KOG2097			GO:0006139,GO:0008168	AT4G09980.1	EMB1691	Methyltransferase MT-A70 family protein
			Cre01.g050608	#N/A	30789296	Cre01.g050608.t1.1	Cre01.g050608.t1.1
			Cre01.g050608	#N/A	30789297	Cre01.g050608.t2.1	Cre01.g050608.t2.1
			Cre01.g050616	#N/A	30788598	Cre01.g050616.t1.1	Cre01.g050616.t1.1
			Cre01.g050624	#N/A	30789018	Cre01.g050624.t1.1	Cre01.g050624.t1.1
			Cre01.g050624	#N/A	30789019	Cre01.g050624.t2.1	Cre01.g050624.t2.1
			Cre01.g050650	#N/A	30789396	Cre01.g050650.t1.2	Cre01.g050650.t1.2
			Cre01.g050700	#N/A	30788772	Cre01.g050700.t1.1	Cre01.g050700.t1.1
			Cre01.g050700	#N/A	30788773	Cre01.g050700.t2.1	Cre01.g050700.t2.1
			Cre01.g050750	#N/A	30789364	Cre01.g050750.t1.1	Cre01.g050750.t1.1
			Cre01.g050800	#N/A	30788830	Cre01.g050800.t1.1	Cre01.g050800.t1.1
			Cre01.g050850	#N/A	30789558	Cre01.g050850.t1.2	Cre01.g050850.t1.2	PF00149	PTHR11668,PTHR11668:SF17	KOG0374	3.1.3.16	K01090	GO:0016787	AT2G27210.1	BSL3	BRI1 suppressor 1 (BSU1)-like 3
			Cre01.g050850	#N/A	30789559	Cre01.g050850.t2.1	Cre01.g050850.t2.1	PF00149	PTHR11668,PTHR11668:SF17	KOG0374	3.1.3.16	K01090	GO:0016787	AT2G27210.1	BSL3	BRI1 suppressor 1 (BSU1)-like 3
			Cre01.g050900	#N/A	30788426	Cre01.g050900.t1.1	Cre01.g050900.t1.1	PF00535
			Cre01.g050950	#N/A	30789075	Cre01.g050950.t1.2	Cre01.g050950.t1.2	PF01494	PTHR10617:SF9,PTHR10617		1.3.1.83	K10960	GO:0004497,GO:0055114	AT1G74470.1		Pyridine nucleotide-disulphide oxidoreductase family protein
			Cre01.g051000	#N/A	30788621	Cre01.g051000.t1.1	Cre01.g051000.t1.1	PF06325	PTHR11006:SF35,PTHR11006	KOG1499			GO:0005737,GO:0006479,GO:0008276	AT4G29510.1	ATPRMT11,ATPRMT1B,PRMT11,PRMT1B	arginine methyltransferase 11
			Cre01.g051050	#N/A	30788313	Cre01.g051050.t1.2	Cre01.g051050.t1.2	PF10591	PTHR10891:SF81,PTHR10891	KOG0027			GO:0005509,GO:0005578,GO:0007165	AT4G04740.2	ATCPK23,CPK23	calcium-dependent protein kinase 23
			Cre01.g051100	#N/A	30788938	Cre01.g051100.t1.2	Cre01.g051100.t1.2	PF02731	PTHR12096	KOG2441		K06063	GO:0000398,GO:0005681	AT1G77180.1	SKIP	chromatin protein family
			Cre01.g051137	#N/A	30789246	Cre01.g051137.t1.1	Cre01.g051137.t1.1
			Cre01.g051174	#N/A	30788325	Cre01.g051174.t1.1	Cre01.g051174.t1.1	PF07716		KOG4005			GO:0003700,GO:0006355,GO:0043565,GO:0046983
			Cre01.g051211	#N/A	30789421	Cre01.g051211.t1.1	Cre01.g051211.t1.1	PF01554	PTHR11206:SF39,PTHR11206	KOG1347			GO:0006855,GO:0015238,GO:0015297,GO:0016020,GO:0055085	AT4G29140.1		MATE efflux family protein
			Cre01.g051250	#N/A	30788520	Cre01.g051250.t1.2	Cre01.g051250.t1.2	PF00036	PTHR10891	KOG0027				AT5G37780.1	ACAM-1,CAM1,TCH1	calmodulin 1
			Cre01.g051300	#N/A	30789009	Cre01.g051300.t1.1	Cre01.g051300.t1.1	PF05572
			Cre01.g051350	#N/A	30789596	Cre01.g051350.t1.1	Cre01.g051350.t1.1
			Cre01.g051400	#N/A	30788787	Cre01.g051400.t1.2	Cre01.g051400.t1.2	PF00810	PTHR10585	KOG3106		K10949	GO:0006621,GO:0016021,GO:0046923	AT3G25040.1	ERD2B	endoplasmic reticulum retention defective 2B
			Cre01.g051400	#N/A	30788788	Cre01.g051400.t2.1	Cre01.g051400.t2.1	PF00810	PTHR10585	KOG3106			GO:0006621,GO:0016021,GO:0046923	AT3G25040.1	ERD2B	endoplasmic reticulum retention defective 2B
			Cre01.g051450	#N/A	30789574	Cre01.g051450.t1.1	Cre01.g051450.t1.1		PTHR13286,PTHR13286:SF3					AT1G75060.1
			Cre01.g051450	#N/A	30789575	Cre01.g051450.t2.1	Cre01.g051450.t2.1		PTHR13286,PTHR13286:SF3					AT1G75060.1
			Cre01.g051466	#N/A	30789021	Cre01.g051466.t1.1	Cre01.g051466.t1.1
			Cre01.g051482	#N/A	30789626	Cre01.g051482.t1.1	Cre01.g051482.t1.1
			Cre01.g051500	#N/A	30788842	Cre01.g051500.t1.2	Cre01.g051500.t1.2	PF05757					GO:0005509,GO:0009523,GO:0009654,GO:0015979,GO:0019898
			Cre01.g051550	#N/A	30788952	Cre01.g051550.t1.1	Cre01.g051550.t1.1	PF00271,PF07717,PF04408	PTHR18934	KOG0922			GO:0003676,GO:0004386,GO:0005524	AT3G26560.1		ATP-dependent RNA helicase, putative
			Cre01.g051625	#N/A	30789169	Cre01.g051625.t1.1	Cre01.g051625.t1.1
			Cre01.g051700	#N/A	30788781	Cre01.g051700.t1.1	Cre01.g051700.t1.1	PF00097	PTHR14155:SF10,PTHR14155					AT1G04790.1		RING/U-box superfamily protein
			Cre01.g051700	#N/A	30788782	Cre01.g051700.t2.1	Cre01.g051700.t2.1	PF00097	PTHR14155:SF10,PTHR14155					AT1G04790.1		RING/U-box superfamily protein
			Cre01.g051750	#N/A	30789675	Cre01.g051750.t1.1	Cre01.g051750.t1.1		PTHR14155:SF10,PTHR14155
			Cre01.g051750	#N/A	30789676	Cre01.g051750.t2.1	Cre01.g051750.t2.1		PTHR14155:SF10,PTHR14155
			Cre01.g051800	#N/A	30789311	Cre01.g051800.t1.1	Cre01.g051800.t1.1	PF00155	PTHR11751:SF31,PTHR11751	KOG0257			GO:0009058,GO:0016769,GO:0030170	AT1G80360.1		Pyridoxal phosphate (PLP)-dependent transferases superfamily protein
			Cre01.g051850	#N/A	30788394	Cre01.g051850.t1.1	Cre01.g051850.t1.1
			Cre01.g051875	#N/A	30788805	Cre01.g051875.t1.1	Cre01.g051875.t1.1
			Cre01.g051900	#N/A	30789261	Cre01.g051900.t1.2	Cre01.g051900.t1.2	PF02921,PF00355	PTHR10134	KOG1671	1.10.2.2	K00411	GO:0008121,GO:0055114,GO:0016679,GO:0016491,GO:0051537	AT5G13440.1		Ubiquinol-cytochrome C reductase iron-sulfur subunit
			Cre01.g051950	#N/A	30789426	Cre01.g051950.t1.2	Cre01.g051950.t1.2	PF00026	PTHR13683	KOG1339			GO:0004190,GO:0006508	AT5G43100.1		Eukaryotic aspartyl protease family protein
			Cre01.g052000	#N/A	30788797	Cre01.g052000.t1.2	Cre01.g052000.t1.2	PF07683,PF02492	PTHR13748					AT1G26520.1		Cobalamin biosynthesis CobW-like protein
			Cre01.g052050	#N/A	30789543	Cre01.g052050.t1.2	Cre01.g052050.t1.2	PF03981	PTHR12184	KOG2873				AT5G51220.1		ubiquinol-cytochrome C chaperone family protein
			Cre01.g052100	#N/A	30788991	Cre01.g052100.t1.2	Cre01.g052100.t1.2	PF00861	PTHR12899			K02881	GO:0003735,GO:0005622,GO:0005840,GO:0006412	AT1G48350.1		Ribosomal L18p/L5e family protein
			Cre01.g052150	#N/A	30789444	Cre01.g052150.t1.1	Cre01.g052150.t1.1	PF00023	PTHR24198:SF303,PTHR24198	KOG4412			GO:0005515	AT5G14230.1
			Cre01.g052200	#N/A	30788504	Cre01.g052200.t1.2	Cre01.g052200.t1.2	PF00076	PTHR13191			K14545	GO:0003676	AT5G38720.1
			Cre01.g052250	#N/A	30789580	Cre01.g052250.t1.2	Cre01.g052250.t1.2	PF00085	PTHR10438:SF82,PTHR10438	KOG0910			GO:0045454,GO:0006662,GO:0009055,GO:0015035	AT1G50320.1	ATHX,ATX,THX	thioredoxin X
			Cre01.g052300	#N/A	30788981	Cre01.g052300.t1.1	Cre01.g052300.t1.1	PF02319	PTHR12081,PTHR12081:SF18	KOG2577			GO:0003700,GO:0005667,GO:0006355	AT5G22220.2	ATE2FB,E2F1,E2FB	E2F transcription factor 1
			Cre01.g052350	#N/A	30788950	Cre01.g052350.t1.1	Cre01.g052350.t1.1	PF00453	PTHR10986	KOG4707			GO:0003735,GO:0005622,GO:0005840,GO:0006412,GO:0019843	AT1G16740.1		Ribosomal protein L20
			Cre01.g052400	#N/A	30789541	Cre01.g052400.t1.2	Cre01.g052400.t1.2	PF02325					GO:0016020	AT5G36120.1	atylmg3,CCB3,YLMG3	cofactor assembly, complex C (B6F)
			Cre01.g052450	#N/A	30788393	Cre01.g052450.t1.1	Cre01.g052450.t1.1
			Cre01.g052500	#N/A	30789082	Cre01.g052500.t1.1	Cre01.g052500.t1.1
			Cre01.g052550	#N/A	30788909	Cre01.g052550.t1.1	Cre01.g052550.t1.1	PF01753	PTHR12298				GO:0008270	AT4G24560.1	UBP16	ubiquitin-specific protease 16
			Cre01.g052601	#N/A	30789642	Cre01.g052601.t1.1	Cre01.g052601.t1.1	PF01136,PF12392					GO:0006508,GO:0008233
			Cre01.g052650	#N/A	30788306	Cre01.g052650.t1.1	Cre01.g052650.t1.1	PF00328	PTHR12750,PTHR12750:SF9				GO:0003993	AT3G01310.2		Phosphoglycerate mutase-like family protein
			Cre01.g052750	#N/A	30789153	Cre01.g052750.t1.1	Cre01.g052750.t1.1	PF06011		KOG3903
			Cre01.g052800	#N/A	30788499	Cre01.g052800.t1.1	Cre01.g052800.t1.1	PF00069	PTHR24055,PTHR24055:SF163	KOG0593			GO:0004672,GO:0005524,GO:0006468	AT5G64960.1	CDKC2,CDKC;2	cyclin dependent kinase group C2
			Cre01.g052800	#N/A	30788500	Cre01.g052800.t2.1	Cre01.g052800.t2.1	PF00069	PTHR24055,PTHR24055:SF163	KOG0594			GO:0004672,GO:0005524,GO:0006468	AT5G64960.1	CDKC2,CDKC;2	cyclin dependent kinase group C2
			Cre01.g052850	#N/A	30789312	Cre01.g052850.t1.1	Cre01.g052850.t1.1	PF00069	PTHR24055,PTHR24055:SF170	KOG0594			GO:0004672,GO:0005524,GO:0006468	AT3G14720.1	ATMPK19,MPK19	MAP kinase 19
			Cre01.g052950	#N/A	30789704	Cre01.g052950.t1.1	Cre01.g052950.t1.1		PTHR23240					AT1G19025.1		DNA repair metallo-beta-lactamase family protein
			Cre01.g053000	#N/A	30788743	Cre01.g053000.t1.2	Cre01.g053000.t1.2	PF07479,PF00702,PF01210	PTHR11728	KOG2711			GO:0005975,GO:0016614,GO:0055114,GO:0003824,GO:0008152,GO:0004367,GO:0006072,GO:0009331,GO:0005737,GO:0016616,GO:0046168,GO:0051287	AT5G40610.1		NAD-dependent glycerol-3-phosphate dehydrogenase family protein
			Cre01.g053050	#N/A	30789481	Cre01.g053050.t1.2	Cre01.g053050.t1.2
			Cre01.g053100	#N/A	30788487	Cre01.g053100.t1.1	Cre01.g053100.t1.1
			Cre01.g053150	#N/A	30789052	Cre01.g053150.t1.2	Cre01.g053150.t1.2	PF07479,PF00702,PF01210	PTHR11728	KOG2711			GO:0005975,GO:0016614,GO:0055114,GO:0003824,GO:0008152,GO:0004367,GO:0006072,GO:0009331,GO:0005737,GO:0016616,GO:0046168,GO:0051287	AT5G40610.1		NAD-dependent glycerol-3-phosphate dehydrogenase family protein
			Cre01.g053150	#N/A	30789053	Cre01.g053150.t2.1	Cre01.g053150.t2.1	PF07479,PF00702,PF01210	PTHR11728	KOG2711			GO:0005975,GO:0016614,GO:0055114,GO:0003824,GO:0008152,GO:0004367,GO:0006072,GO:0009331,GO:0005737,GO:0016616,GO:0046168,GO:0051287	AT5G40610.1		NAD-dependent glycerol-3-phosphate dehydrogenase family protein
			Cre01.g053200	#N/A	30788419	Cre01.g053200.t1.1	Cre01.g053200.t1.1	PF06087	PTHR12415		3.1.4.-	K10862	GO:0005634,GO:0006281,GO:0008081	AT5G15170.1	TDP1	tyrosyl-DNA phosphodiesterase-related
			Cre01.g053250	#N/A	30789240	Cre01.g053250.t1.1	Cre01.g053250.t1.1		PTHR12706	KOG1513				AT1G79350.1	EMB1135	RING/FYVE/PHD zinc finger superfamily protein
			Cre01.g053288	#N/A	30788336	Cre01.g053288.t1.2	Cre01.g053288.t1.2	PF05189,PF01137	PTHR11096	KOG3980			GO:0006396
			Cre01.g053288	#N/A	30788337	Cre01.g053288.t2.1	Cre01.g053288.t2.1	PF05189,PF01137	PTHR11096	KOG3980	6.5.1.4	K01974	GO:0006396	AT5G22100.1		RNA cyclase family protein
			Cre01.g053300	#N/A	30789062	Cre01.g053300.t1.1	Cre01.g053300.t1.1	PF04371						AT5G08170.1	ATAIH,EMB1873	porphyromonas-type peptidyl-arginine deiminase family protein
			Cre01.g053350	#N/A	30789556	Cre01.g053350.t1.1	Cre01.g053350.t1.1
			Cre01.g053360	#N/A	30788585	Cre01.g053360.t1.2	Cre01.g053360.t1.2		PTHR24106	KOG4308				AT1G10510.1	emb2004	RNI-like superfamily protein
			Cre01.g053450	#N/A	30788463	Cre01.g053450.t1.1	Cre01.g053450.t1.1	PF00211	PTHR16305:SF7,PTHR16305				GO:0009190,GO:0016849,GO:0035556
			Cre01.g053500	#N/A	30789237	Cre01.g053500.t1.1	Cre01.g053500.t1.1	PF00432	PTHR11774:SF5,PTHR11774	KOG0366	2.5.1.60	K05956	GO:0003824	AT3G12070.1	AtRGTB2,RGTB2	RAB geranylgeranyl transferase beta subunit 2
			Cre01.g053550	#N/A	30789133	Cre01.g053550.t1.1	Cre01.g053550.t1.1
			Cre01.g053600	#N/A	30788479	Cre01.g053600.t1.2	Cre01.g053600.t1.2	PF01016	PTHR15893				GO:0003735,GO:0005622,GO:0005840,GO:0006412	AT5G40950.1	RPL27	ribosomal protein large subunit 27
			Cre01.g053700	#N/A	30788993	Cre01.g053700.t1.1	Cre01.g053700.t1.1	PF00027	PTHR10217:SF393,PTHR10217	KOG0500				AT3G02850.1	SKOR	STELAR K+ outward rectifier
			Cre01.g053750	#N/A	30788789	Cre01.g053750.t1.2	Cre01.g053750.t1.2	PF03099	PTHR12561				GO:0003824,GO:0006464	AT3G29010.1		Biotin/lipoate A/B protein ligase family
			Cre01.g053800	#N/A	30789515	Cre01.g053800.t1.1	Cre01.g053800.t1.1
			Cre01.g053850	#N/A	30788730	Cre01.g053850.t1.2	Cre01.g053850.t1.2	PF00400	PTHR22847:SF99,PTHR22847	KOG0315				AT5G52250.1		Transducin/WD40 repeat-like superfamily protein
			Cre01.g053900	#N/A	30789687	Cre01.g053900.t1.1	Cre01.g053900.t1.1	PF01841	PTHR12143		3.5.1.52	K01456		AT5G49570.1	AtPNG1,PNG1	peptide-N-glycanase 1
			Cre01.g053950	#N/A	30788559	Cre01.g053950.t1.1	Cre01.g053950.t1.1
			Cre01.g054000	#N/A	30789486	Cre01.g054000.t1.2	Cre01.g054000.t1.2	PF01585	PTHR23149,PTHR23149:SF1				GO:0003676,GO:0005622	AT1G63980.1		D111/G-patch domain-containing protein
			Cre01.g054050	#N/A	30788312	Cre01.g054050.t1.2	Cre01.g054050.t1.2	PF09834
			Cre01.g054100	#N/A	30789315	Cre01.g054100.t1.1	Cre01.g054100.t1.1	PF00560	PTHR23155,PTHR23155:SF81	KOG0617			GO:0005515	AT3G15410.1		Leucine-rich repeat (LRR) family protein
			Cre01.g054150	#N/A	30789662	Cre01.g054150.t1.2	Cre01.g054150.t1.2	PF07992,PF00070,PF00085	PTHR22912,PTHR22912:SF51	KOG0404	1.8.1.9	K00384	GO:0016491,GO:0050660,GO:0055114,GO:0045454	AT2G41680.1	NTRC	NADPH-dependent thioredoxin reductase C
			Cre01.g054200	#N/A	30789059	Cre01.g054200.t1.2	Cre01.g054200.t1.2
			Cre01.g054250	#N/A	30789532	Cre01.g054250.t1.2	Cre01.g054250.t1.2	PF00067	PTHR24301,PTHR24301:SF127	KOG0158	1.14.14.1	K07424	GO:0005506,GO:0009055,GO:0016705,GO:0020037	AT2G26170.1	CYP711A1,MAX1	cytochrome P450, family 711, subfamily A, polypeptide 1
			Cre01.g054300	#N/A	30788912	Cre01.g054300.t1.1	Cre01.g054300.t1.1
			Cre01.g054350	#N/A	30788934	Cre01.g054350.t1.1	Cre01.g054350.t1.1
			Cre01.g054400	#N/A	30789619	Cre01.g054400.t1.1	Cre01.g054400.t1.1
			Cre01.g054433	#N/A	30788838	Cre01.g054433.t1.1	Cre01.g054433.t1.1		PTHR13078,PTHR13078:SF14
			Cre01.g054433	#N/A	30788839	Cre01.g054433.t2.1	Cre01.g054433.t2.1		PTHR13078,PTHR13078:SF14
			Cre01.g054500	#N/A	30788821	Cre01.g054500.t1.2	Cre01.g054500.t1.2	PF02233,PF05222,PF01262	PTHR10160,PTHR10160:SF14		1.6.1.2	K00323	GO:0008746,GO:0055114,GO:0016491
			Cre01.g054550	#N/A	30788655	Cre01.g054550.t1.2	Cre01.g054550.t1.2
			Cre01.g054600	#N/A	30789266	Cre01.g054600.t1.1	Cre01.g054600.t1.1
			Cre01.g054650	#N/A	30788443	Cre01.g054650.t1.1	Cre01.g054650.t1.1							AT4G26980.1		RNI-like superfamily protein
			Cre01.g054700	#N/A	30788472	Cre01.g054700.t1.2	Cre01.g054700.t1.2
			Cre01.g054750	#N/A	30789097	Cre01.g054750.t1.2	Cre01.g054750.t1.2	PF00069	PTHR24347,PTHR24347:SF65	KOG0583			GO:0004672,GO:0005524,GO:0006468	AT4G04740.2	ATCPK23,CPK23	calcium-dependent protein kinase 23
			Cre01.g054800	#N/A	30788988	Cre01.g054800.t1.2	Cre01.g054800.t1.2							AT3G62010.1
			Cre01.g054850	#N/A	30789488	Cre01.g054850.t1.2	Cre01.g054850.t1.2
			Cre01.g054900	#N/A	30789494	Cre01.g054900.t1.2	Cre01.g054900.t1.2
			Cre01.g054950	#N/A	30788594	Cre01.g054950.t1.2	Cre01.g054950.t1.2	PF02466					GO:0005743,GO:0008565,GO:0015031
			Cre01.g055000	#N/A	30789186	Cre01.g055000.t1.1	Cre01.g055000.t1.1	PF00293					GO:0016787
			Cre01.g055050	#N/A	30788402	Cre01.g055050.t1.2	Cre01.g055050.t1.2		PTHR22875	KOG3246				AT5G60190.1		Cysteine proteinases superfamily protein
			Cre01.g055100	#N/A	30788314	Cre01.g055100.t1.1	Cre01.g055100.t1.1	PF00097
			Cre01.g055151	#N/A	30789005	Cre01.g055151.t1.1	Cre01.g055151.t1.1
			Cre01.g055200	#N/A	30789482	Cre01.g055200.t1.2	Cre01.g055200.t1.2	PF05030	PTHR23107					AT4G00850.1	GIF3	GRF1-interacting factor 3
			Cre01.g055250	#N/A	30788709	Cre01.g055250.t1.2	Cre01.g055250.t1.2		PTHR10108,PTHR10108:SF383
			Cre01.g055300	#N/A	30788737	Cre01.g055300.t1.1	Cre01.g055300.t1.1
			Cre01.g055316	#N/A	30789281	Cre01.g055316.t1.1	Cre01.g055316.t1.1
			Cre01.g055316	#N/A	30789282	Cre01.g055316.t2.1	Cre01.g055316.t2.1
			Cre01.g055350	#N/A	30789632	Cre01.g055350.t1.2	Cre01.g055350.t1.2
			Cre01.g055400	#N/A	30789023	Cre01.g055400.t1.2	Cre01.g055400.t1.2	PF05022	PTHR23216					AT5G57120.1
			Cre01.g055404	#N/A	30789420	Cre01.g055404.t1.1	Cre01.g055404.t1.1
			Cre01.g055408	#N/A	30788826	Cre01.g055408.t1.1	Cre01.g055408.t1.1	PF00501,PF11930	PTHR24095:SF42,PTHR24095	KOG1175	6.2.1.1	K01895	GO:0003824,GO:0008152	AT5G36880.2	ACS	acetyl-CoA synthetase
			Cre01.g055412	#N/A	30789256	Cre01.g055412.t1.1	Cre01.g055412.t1.1							AT5G27290.1
			Cre01.g055416	#N/A	30788711	Cre01.g055416.t1.1	Cre01.g055416.t1.1	PF02966	PTHR12052	KOG3414		K12859	GO:0005681,GO:0007067	AT5G08290.1	YLS8	mRNA splicing factor, thioredoxin-like U5 snRNP
			Cre01.g055420	#N/A	30789130	Cre01.g055420.t1.1	Cre01.g055420.t1.1	PF00400	PTHR11871	KOG1354		K04354	GO:0000159,GO:0007165,GO:0008601	AT1G17720.2	ATB BETA	Protein phosphatase 2A, regulatory subunit PR55
			Cre01.g055424	#N/A	30789504	Cre01.g055424.t1.1	Cre01.g055424.t1.1	PF08510	PTHR21726:SF5,PTHR21726			K03861		AT2G39445.1		Phosphatidylinositol N-acetylglucosaminyltransferase, GPI19/PIG-P subunit
			Cre01.g055428	#N/A	30788899	Cre01.g055428.t1.1	Cre01.g055428.t1.1		PTHR10891,PTHR10891:SF41					AT3G50360.1	ATCEN2,CEN1,CEN2	centrin2
			Cre01.g055432	#N/A	30788613	Cre01.g055432.t1.1	Cre01.g055432.t1.1	PF00924		KOG0487			GO:0016020,GO:0055085	AT1G58200.1	MSL3	MSCS-like 3
			Cre01.g055436	#N/A	30788412	Cre01.g055436.t1.1	Cre01.g055436.t1.1
			Cre01.g055440	#N/A	30789214	Cre01.g055440.t1.1	Cre01.g055440.t1.1		PTHR10605,PTHR10605:SF3
			Cre01.g055444	#N/A	30788983	Cre01.g055444.t1.1	Cre01.g055444.t1.1
			Cre01.g055448	#N/A	30789048	Cre01.g055448.t1.1	Cre01.g055448.t1.1
			Cre01.g055453	#N/A	30789656	Cre01.g055453.t1.1	Cre01.g055453.t1.1	PF10369,PF01842		KOG2663	2.2.1.6	K01653	GO:0008152,GO:0016597	AT5G16290.1	VAT1	VALINE-TOLERANT 1
			Cre01.g055457	#N/A	30788875	Cre01.g055457.t1.1	Cre01.g055457.t1.1	PF00069	PTHR24347,PTHR24347:SF65	KOG0583			GO:0004672,GO:0005524,GO:0006468	AT4G04740.2	ATCPK23,CPK23	calcium-dependent protein kinase 23
			Cre01.g055457	#N/A	30788876	Cre01.g055457.t2.1	Cre01.g055457.t2.1	PF00069	PTHR24347,PTHR24347:SF65	KOG0583			GO:0004672,GO:0005524,GO:0006468	AT4G04740.2	ATCPK23,CPK23	calcium-dependent protein kinase 23
			Cre01.g055461	#N/A	30788662	Cre01.g055461.t1.1	Cre01.g055461.t1.1
			Cre01.g055465	#N/A	30788734	Cre01.g055465.t1.1	Cre01.g055465.t1.1	PF00650	PTHR10174:SF78,PTHR10174	KOG1470				AT1G01630.1		Sec14p-like phosphatidylinositol transfer family protein
			Cre01.g055469	#N/A	30789096	Cre01.g055469.t1.1	Cre01.g055469.t1.1	PF04072					GO:0008168	AT4G02405.1		S-adenosyl-L-methionine-dependent methyltransferases superfamily protein
			Cre01.g055473	#N/A	30788497	Cre01.g055473.t1.1	Cre01.g055473.t1.1
			Cre01.g055477	#N/A	30789325	Cre01.g055477.t1.1	Cre01.g055477.t1.1	PF00069					GO:0004672,GO:0005524,GO:0006468
			Cre01.g055500	#N/A	30788333	Cre01.g055500.t1.1	Cre01.g055500.t1.1
			Cre01.g055550	#N/A	30789317	Cre01.g055550.t1.2	Cre01.g055550.t1.2	PF04442	PTHR21320	KOG2540		K02258	GO:0005507	AT1G02410.1		cytochrome c oxidase assembly protein CtaG / Cox11 family
			Cre01.g055600	#N/A	30788322	Cre01.g055600.t1.1	Cre01.g055600.t1.1	PF00225	PTHR24115	KOG0240			GO:0003777,GO:0005524,GO:0007018	AT3G44050.1		P-loop containing nucleoside triphosphate hydrolases superfamily protein
			Cre01.g055966	#N/A	30789139	Cre01.g055966.t1.1	Cre01.g055966.t1.1
			Cre01.g056331	#N/A	30788861	Cre01.g056331.t1.1	Cre01.g056331.t1.1	PF01965	PTHR11019,PTHR11019:SF4	KOG2764		K03152		AT4G34020.1		Class I glutamine amidotransferase-like superfamily protein
			Cre01.g056696	#N/A	30789399	Cre01.g056696.t1.1	Cre01.g056696.t1.1
			Cre01.g056696	#N/A	30789400	Cre01.g056696.t2.1	Cre01.g056696.t2.1
			Cre01.g057061	#N/A	30788872	Cre01.g057061.t1.1	Cre01.g057061.t1.1
			Cre01.g057426	#N/A	30788404	Cre01.g057426.t1.1	Cre01.g057426.t1.1
			Cre01.g057791	#N/A	30788819	Cre01.g057791.t1.1	Cre01.g057791.t1.1
			Cre01.g058156	#N/A	30789313	Cre01.g058156.t1.1	Cre01.g058156.t1.1
			Cre01.g058521	#N/A	30789501	Cre01.g058521.t1.1	Cre01.g058521.t1.1	PF00534	PTHR12526,PTHR12526:SF23	KOG1387	2.4.1.-	K03844	GO:0009058	AT2G40190.1	LEW3	UDP-Glycosyltransferase superfamily protein
			Cre01.g058886	#N/A	30788735	Cre01.g058886.t1.1	Cre01.g058886.t1.1	PF01926,PF02824	PTHR11702,PTHR11702:SF7	KOG1486			GO:0005525,GO:0005622	AT1G72660.1		P-loop containing nucleoside triphosphate hydrolases superfamily protein
			Cre01.g059252	#N/A	30789671	Cre01.g059252.t1.1	Cre01.g059252.t1.1
			Cre01.g059617	#N/A	30788987	Cre01.g059617.t1.1	Cre01.g059617.t1.1
			Cre01.g059982	#N/A	30789440	Cre01.g059982.t1.1	Cre01.g059982.t1.1
			Cre01.g060347	#N/A	30788831	Cre01.g060347.t1.1	Cre01.g060347.t1.1
			Cre01.g060712	#N/A	30789264	Cre01.g060712.t1.1	Cre01.g060712.t1.1	PF01485	PTHR24985,PTHR24985:SF5				GO:0008270	AT4G19670.1		RING/U-box superfamily protein
			Cre01.g061077	#N/A	30788304	Cre01.g061077.t1.1	Cre01.g061077.t1.1	PF01842					GO:0008152,GO:0016597	AT5G04740.1		ACT domain-containing protein
			Cre01.g061442	#N/A	30789677	Cre01.g061442.t1.1	Cre01.g061442.t1.1	PF03931	PTHR20648	KOG3473		K03872	GO:0006511	AT5G59140.1		BTB/POZ domain-containing protein
			Cre01.g061807	#N/A	30788553	Cre01.g061807.t1.1	Cre01.g061807.t1.1	PF01027	PTHR23291,PTHR23291:SF4	KOG1629				AT5G47120.1	ATBI-1,ATBI1,BI-1,BI1	BAX inhibitor 1
			Cre01.g062172	#N/A	30789439	Cre01.g062172.t1.1	Cre01.g062172.t1.1	PF00125	PTHR23428	KOG1744		K11252	GO:0003677,GO:0000786,GO:0005634,GO:0006334	AT1G07790.1	HTB1	Histone superfamily protein
			Cre01.g062537	#N/A	30789657	Cre01.g062537.t1.1	Cre01.g062537.t1.1	PF10601	PTHR23292
			Cre01.g062902	#N/A	30788748	Cre01.g062902.t1.1	Cre01.g062902.t1.1	PF05983	PTHR21428,PTHR21428:SF6				GO:0016455,GO:0006357,GO:0016592	AT5G03500.1		Mediator complex, subunit Med7
			Cre01.g063267	#N/A	30789523	Cre01.g063267.t1.1	Cre01.g063267.t1.1	PF05291	PTHR12821	KOG3871				AT1G31660.1
			Cre01.g063632	#N/A	30788545	Cre01.g063632.t1.1	Cre01.g063632.t1.1	PF00730,PF07934	PTHR10242	KOG2875	3.2.2.-,4.2.99.18	K03660	GO:0006284,GO:0003684,GO:0006289,GO:0008534	AT1G21710.1	ATOGG1,OGG1	8-oxoguanine-DNA glycosylase 1
			Cre01.g063997	#N/A	30788525	Cre01.g063997.t1.1	Cre01.g063997.t1.1	PF06741	PTHR22968				GO:0004697,GO:0005524,GO:0006468	AT3G14010.1	CID4	CTC-interacting domain 4
			Cre01.g063997	#N/A	30788526	Cre01.g063997.t2.1	Cre01.g063997.t2.1	PF06741	PTHR22968				GO:0004697,GO:0005524,GO:0006468	AT3G14010.1	CID4	CTC-interacting domain 4
			Cre01.g064362	#N/A	30789078	Cre01.g064362.t1.1	Cre01.g064362.t1.1	PF00069	PTHR23257:SF365,PTHR23257	KOG0580			GO:0004672,GO:0005524,GO:0006468	AT3G46920.1		Protein kinase superfamily protein with octicosapeptide/Phox/Bem1p domain
			Cre01.g064727	#N/A	30788461	Cre01.g064727.t1.1	Cre01.g064727.t1.1	PF00069	PTHR23257:SF365,PTHR23257	KOG0192			GO:0004672,GO:0005524,GO:0006468	AT3G46920.1		Protein kinase superfamily protein with octicosapeptide/Phox/Bem1p domain
			Cre01.g065092	#N/A	30789123	Cre01.g065092.t1.1	Cre01.g065092.t1.1
			Cre01.g065457	#N/A	30789352	Cre01.g065457.t1.1	Cre01.g065457.t1.1
			Cre01.g065822	#N/A	30788741	Cre01.g065822.t1.1	Cre01.g065822.t1.1	PF00400	PTHR12764	KOG1538				AT5G56130.1	AtTEX1,TEX1,THO3	Transducin/WD40 repeat-like superfamily protein
			Cre01.g066187	#N/A	30789452	Cre01.g066187.t1.1	Cre01.g066187.t1.1	PF02535	PTHR11065				GO:0016020,GO:0030001,GO:0046873,GO:0055085	AT3G20870.1	ZTP29	ZIP metal ion transporter family
			Cre01.g066552	#N/A	30789368	Cre01.g066552.t1.1	Cre01.g066552.t1.1	PF00085	PTHR10438:SF15,PTHR10438	KOG0907			GO:0045454,GO:0006662,GO:0009055,GO:0015035	AT3G02730.1	ATF1,TRXF1	thioredoxin F-type 1
			Cre01.g067282	#N/A	30789591	Cre01.g067282.t1.1	Cre01.g067282.t1.1
			Cre01.g067647	#N/A	30789327	Cre01.g067647.t1.1	Cre01.g067647.t1.1
			Cre01.g068012	#N/A	30789272	Cre01.g068012.t1.1	Cre01.g068012.t1.1	PF01535	PTHR24633:SF14,PTHR24633					AT2G31400.1	GUN1	genomes uncoupled 1
			Cre01.g068377	#N/A	30788462	Cre01.g068377.t1.1	Cre01.g068377.t1.1	PF03914	PTHR12455					AT2G17250.1	EMB2762	CCAAT-binding factor
			Cre01.g068742	#N/A	30789645	Cre01.g068742.t1.1	Cre01.g068742.t1.1							AT3G10770.1		Single-stranded nucleic acid binding R3H protein
			Cre01.g069107	#N/A	30789405	Cre01.g069107.t1.1	Cre01.g069107.t1.1	PF10203		KOG4114				AT1G10865.1
			Cre01.g069472	#N/A	30788955	Cre01.g069472.t1.1	Cre01.g069472.t1.1	PF01406	PTHR10890	KOG2007	6.1.1.16	K01883	GO:0000166,GO:0004817,GO:0005524,GO:0005737,GO:0006412,GO:0006423	AT2G31170.1	SYCO ARATH	Cysteinyl-tRNA synthetase, class Ia family protein
			Cre01.g069837	#N/A	30788614	Cre01.g069837.t1.1	Cre01.g069837.t1.1	PF00027
			Cre01.g070202	#N/A	30789241	Cre01.g070202.t1.1	Cre01.g070202.t1.1
			Cre01.g070567	#N/A	30789058	Cre01.g070567.t1.1	Cre01.g070567.t1.1	PF06870		KOG4183			GO:0003677,GO:0003899,GO:0005634,GO:0006351	AT3G13940.1		DNA binding;DNA-directed RNA polymerases
			Cre01.g070932	#N/A	30788643	Cre01.g070932.t1.1	Cre01.g070932.t1.1	PF03110					GO:0003677,GO:0005634	AT1G76580.1		Squamosa promoter-binding protein-like (SBP domain) transcription factor family protein
			Cre01.g071297	#N/A	30789595	Cre01.g071297.t1.1	Cre01.g071297.t1.1
			Cre01.g071662	#N/A	30788823	Cre01.g071662.t1.1	Cre01.g071662.t1.1	PF00501,PF11930	PTHR24095:SF42,PTHR24095	KOG1175	6.2.1.1	K01895	GO:0003824,GO:0008152	AT5G36880.2	ACS	acetyl-CoA synthetase
			Cre01.g072027	#N/A	30789552	Cre01.g072027.t1.1	Cre01.g072027.t1.1		PTHR13078,PTHR13078:SF14
			Cre02.g073150	#N/A	30785591	Cre02.g073150.t1.2	Cre02.g073150.t1.2
			Cre02.g073176	#N/A	30784818	Cre02.g073176.t1.1	Cre02.g073176.t1.1	PF07282	PTHR23257,PTHR23257:SF99
			Cre02.g073200	#N/A	30784929	Cre02.g073200.t1.2	Cre02.g073200.t1.2	PF00585,PF00291	PTHR10314,PTHR10314:SF30	KOG1250	4.3.1.19	K01754	GO:0004794,GO:0009097,GO:0003824,GO:0008152,GO:0030170	AT3G10050.1	OMR1	L-O-methylthreonine resistant 1
			Cre02.g073250	#N/A	30785493	Cre02.g073250.t1.1	Cre02.g073250.t1.1	PF07500	PTHR11477				GO:0006351	AT5G25520.2		SPOC domain / Transcription elongation factor S-II protein
			Cre02.g073300	#N/A	30786155	Cre02.g073300.t1.1	Cre02.g073300.t1.1		PTHR11804,PTHR11804:SF5					AT5G51540.1		Zincin-like metalloproteases family protein
			Cre02.g073350	#N/A	30785429	Cre02.g073350.t1.2	Cre02.g073350.t1.2
			Cre02.g073400	#N/A	30785432	Cre02.g073400.t1.1	Cre02.g073400.t1.1	PF01432	PTHR11804,PTHR11804:SF5	KOG2090	3.4.24.59	K01410	GO:0004222,GO:0006508	AT5G51540.1		Zincin-like metalloproteases family protein
			Cre02.g073450	#N/A	30786273	Cre02.g073450.t1.1	Cre02.g073450.t1.1
			Cre02.g073500	#N/A	30785256	Cre02.g073500.t1.1	Cre02.g073500.t1.1
			Cre02.g073550	#N/A	30786027	Cre02.g073550.t1.2	Cre02.g073550.t1.2	PF00956	PTHR11875,PTHR11875:SF7	KOG1507			GO:0005634,GO:0006334	AT4G26110.1	ATNAP1;1,NAP1;1	nucleosome assembly protein1;1
			Cre02.g073600	#N/A	30785042	Cre02.g073600.t1.1	Cre02.g073600.t1.1
			Cre02.g073650	#N/A	30785080	Cre02.g073650.t1.2	Cre02.g073650.t1.2	PF00400,PF11789,PF08606	PTHR13889,PTHR13889:SF11	KOG0289	6.3.2.19	K10599		AT2G33340.1	MAC3B	MOS4-associated complex 3B
			Cre02.g073650	#N/A	30785081	Cre02.g073650.t2.1	Cre02.g073650.t2.1	PF00400,PF11789,PF08606	PTHR13889,PTHR13889:SF11	KOG0289	6.3.2.19	K10599		AT2G33340.1	MAC3B	MOS4-associated complex 3B
			Cre02.g073700	#N/A	30785832	Cre02.g073700.t1.2	Cre02.g073700.t1.2	PF01208	PTHR21091,PTHR21091:SF2	KOG2872			GO:0004853,GO:0006779	AT2G40490.1	HEME2	Uroporphyrinogen decarboxylase
			Cre02.g073700	#N/A	30785831	Cre02.g073700.t2.1	Cre02.g073700.t2.1	PF01208	PTHR21091,PTHR21091:SF2	KOG2872			GO:0004853,GO:0006779	AT2G40490.1	HEME2	Uroporphyrinogen decarboxylase
			Cre02.g073750	#N/A	30784795	Cre02.g073750.t1.2	Cre02.g073750.t1.2	PF00225	PTHR24115,PTHR24115:SF333	KOG4280		K10397	GO:0003777,GO:0005524,GO:0007018	AT1G59540.1	ZCF125	P-loop containing nucleoside triphosphate hydrolases superfamily protein
			Cre02.g073800	#N/A	30785565	Cre02.g073800.t1.2	Cre02.g073800.t1.2	PF07896						AT5G67490.1
			Cre02.g073826	#N/A	30785966	Cre02.g073826.t1.1	Cre02.g073826.t1.1
			Cre02.g073850	#N/A	30785212	Cre02.g073850.t1.2	Cre02.g073850.t1.2							AT1G05385.1	LPA19,Psb27-H1	photosystem II 11 kDa protein-related
			Cre02.g073900	#N/A	30786408	Cre02.g073900.t1.1	Cre02.g073900.t1.1	PF03055	PTHR10543,PTHR10543:SF6	KOG1285				AT4G32810.1	ATCCD8,CCD8,MAX4	carotenoid cleavage dioxygenase 8
			Cre02.g073950	#N/A	30785458	Cre02.g073950.t1.2	Cre02.g073950.t1.2	PF03055	PTHR10543,PTHR10543:SF6	KOG1285				AT4G32810.1	ATCCD8,CCD8,MAX4	carotenoid cleavage dioxygenase 8
			Cre02.g074000	#N/A	30785872	Cre02.g074000.t1.1	Cre02.g074000.t1.1		PTHR22847	KOG0977				AT5G66030.2	ATGRIP,GRIP	Golgi-localized GRIP domain-containing protein
			Cre02.g074000	#N/A	30785873	Cre02.g074000.t2.1	Cre02.g074000.t2.1		PTHR22847	KOG0977				AT5G66030.2	ATGRIP,GRIP	Golgi-localized GRIP domain-containing protein
			Cre02.g074050	#N/A	30785202	Cre02.g074050.t1.1	Cre02.g074050.t1.1	PF04080	PTHR13148	KOG2970				AT1G16560.1		Per1-like family protein
			Cre02.g074100	#N/A	30785783	Cre02.g074100.t1.2	Cre02.g074100.t1.2							AT5G42070.1
			Cre02.g074150	#N/A	30785488	Cre02.g074150.t1.1	Cre02.g074150.t1.1	PF00512,PF00072,PF01036,PF02518,PF00211	PTHR24423		2.7.13.3	K02486	GO:0000155,GO:0007165,GO:0016020,GO:0000156,GO:0000160,GO:0006355,GO:0005216,GO:0006811,GO:0005524,GO:0009190,GO:0016849,GO:0035556	AT2G17820.1	AHK1,ATHK1,HK1	histidine kinase 1
			Cre02.g074150	#N/A	30785489	Cre02.g074150.t2.1	Cre02.g074150.t2.1	PF00512,PF00072,PF01036,PF02518,PF00211	PTHR24423	KOG0519	2.7.13.3	K02486	GO:0000155,GO:0007165,GO:0016020,GO:0000156,GO:0000160,GO:0006355,GO:0005216,GO:0006811,GO:0005524,GO:0009190,GO:0016849,GO:0035556	AT2G17820.1	AHK1,ATHK1,HK1	histidine kinase 1
			Cre02.g074200	#N/A	30786384	Cre02.g074200.t1.2	Cre02.g074200.t1.2
			Cre02.g074217	#N/A	30785648	Cre02.g074217.t1.2	Cre02.g074217.t1.2
			Cre02.g074250	#N/A	30786176	Cre02.g074250.t1.1	Cre02.g074250.t1.1
			Cre02.g074300	#N/A	30785357	Cre02.g074300.t1.1	Cre02.g074300.t1.1	PF11707						AT4G27010.2
			Cre02.g074350	#N/A	30786198	Cre02.g074350.t1.1	Cre02.g074350.t1.1			KOG2945
			Cre02.g074370	#N/A	30785249	Cre02.g074370.t1.2	Cre02.g074370.t1.2	PF00069,PF00036	PTHR24349	KOG0032			GO:0004672,GO:0005524,GO:0006468	AT5G12180.1	CPK17	calcium-dependent protein kinase 17
			Cre02.g074400	#N/A	30785769	Cre02.g074400.t1.1	Cre02.g074400.t1.1
			Cre02.g074437	#N/A	30785211	Cre02.g074437.t1.1	Cre02.g074437.t1.1
			Cre02.g074474	#N/A	30785777	Cre02.g074474.t1.1	Cre02.g074474.t1.1
			Cre02.g074511	#N/A	30786235	Cre02.g074511.t1.1	Cre02.g074511.t1.1	PF00013	PTHR10288				GO:0003723	AT2G25970.1		KH domain-containing protein
			Cre02.g074550	#N/A	30785356	Cre02.g074550.t1.2	Cre02.g074550.t1.2
			Cre02.g074600	#N/A	30786196	Cre02.g074600.t1.1	Cre02.g074600.t1.1	PF05903	PTHR12378,PTHR12378:SF2	KOG0324				AT4G25660.1		PPPDE putative thiol peptidase family protein
			Cre02.g074626	#N/A	30785789	Cre02.g074626.t1.1	Cre02.g074626.t1.1
			Cre02.g074650	#N/A	30784809	Cre02.g074650.t1.2	Cre02.g074650.t1.2	PF00887,PF01344	PTHR23244,PTHR23244:SF29	KOG0379			GO:0000062,GO:0005515	AT3G05420.2	ACBP4	acyl-CoA binding protein 4
			Cre02.g074700	#N/A	30785268	Cre02.g074700.t1.2	Cre02.g074700.t1.2	PF04359						AT1G27385.1
			Cre02.g074720	#N/A	30786352	Cre02.g074720.t1.1	Cre02.g074720.t1.1
			Cre02.g074737	#N/A	30785460	Cre02.g074737.t1.2	Cre02.g074737.t1.2
			Cre02.g074758	#N/A	30786103	Cre02.g074758.t1.1	Cre02.g074758.t1.1	PF00211	PTHR11920:SF147,PTHR11920				GO:0009190,GO:0016849,GO:0035556
			Cre02.g074758	#N/A	30786104	Cre02.g074758.t2.1	Cre02.g074758.t2.1	PF00211	PTHR11920:SF147,PTHR11920				GO:0009190,GO:0016849,GO:0035556
			Cre02.g074800	#N/A	30786322	Cre02.g074800.t1.1	Cre02.g074800.t1.1	PF00211	PTHR11920:SF147,PTHR11920	KOG0845			GO:0009190,GO:0016849,GO:0035556
			Cre02.g074800	#N/A	30786323	Cre02.g074800.t2.1	Cre02.g074800.t2.1	PF00211	PTHR11920:SF147,PTHR11920	KOG0845			GO:0009190,GO:0016849,GO:0035556
			Cre02.g074850	#N/A	30785545	Cre02.g074850.t1.1	Cre02.g074850.t1.1	PF00069	PTHR24349:SF99,PTHR24349	KOG0580			GO:0004672,GO:0005524,GO:0006468	AT2G45490.1	AtAUR3,AUR3	ataurora3
			Cre02.g074900	#N/A	30786170	Cre02.g074900.t1.1	Cre02.g074900.t1.1	PF00168	PTHR10774:SF2,PTHR10774				GO:0005515	AT3G19830.1	NTMC2T5.2,NTMC2TYPE5.2	Calcium-dependent lipid-binding (CaLB domain) family protein
			Cre02.g074950	#N/A	30785400	Cre02.g074950.t1.1	Cre02.g074950.t1.1
			Cre02.g074976	#N/A	30786435	Cre02.g074976.t1.1	Cre02.g074976.t1.1
			Cre02.g075000	#N/A	30785477	Cre02.g075000.t1.1	Cre02.g075000.t1.1	PF04749	PTHR15907,PTHR15907:SF14					AT1G49030.1		PLAC8 family protein
			Cre02.g075000	#N/A	30785479	Cre02.g075000.t2.1	Cre02.g075000.t2.1	PF04749	PTHR15907,PTHR15907:SF14
			Cre02.g075000	#N/A	30785478	Cre02.g075000.t3.1	Cre02.g075000.t3.1	PF04749	PTHR15907,PTHR15907:SF14
			Cre02.g075000	#N/A	30785480	Cre02.g075000.t4.1	Cre02.g075000.t4.1	PF04749	PTHR15907,PTHR15907:SF14
			Cre02.g075000	#N/A	30785481	Cre02.g075000.t5.1	Cre02.g075000.t5.1	PF04749	PTHR15907,PTHR15907:SF14
			Cre02.g075050	#N/A	30785976	Cre02.g075050.t1.2	Cre02.g075050.t1.2	PF00083	PTHR24064:SF16,PTHR24064	KOG0252		K08176	GO:0016021,GO:0022857,GO:0055085	AT5G43340.1	PHT1;6,PHT6	phosphate transporter 1;6
			Cre02.g075100	#N/A	30786071	Cre02.g075100.t1.2	Cre02.g075100.t1.2		PTHR22904:SF60,PTHR22904	KOG4234				AT4G30480.2		Tetratricopeptide repeat (TPR)-like superfamily protein
			Cre02.g075100	#N/A	30786072	Cre02.g075100.t2.1	Cre02.g075100.t2.1		PTHR22904:SF60,PTHR22904	KOG4234				AT4G30480.2		Tetratricopeptide repeat (TPR)-like superfamily protein
			Cre02.g075150	#N/A	30785072	Cre02.g075150.t1.2	Cre02.g075150.t1.2	PF04567,PF04566,PF04561,PF04565,PF04563,PF04560,PF00562	PTHR20856:SF7,PTHR20856	KOG0214	2.7.7.6	K03010	GO:0003677,GO:0003899,GO:0006351,GO:0032549	AT4G21710.1	EMB1989,NRPB2,RPB2	DNA-directed RNA polymerase family protein
			Cre02.g075150	#N/A	30785073	Cre02.g075150.t2.1	Cre02.g075150.t2.1	PF04567,PF04566,PF04561,PF04565,PF04563,PF04560,PF00562	PTHR20856:SF7,PTHR20856	KOG0214	2.7.7.6	K03010	GO:0003677,GO:0003899,GO:0006351,GO:0032549	AT4G21710.1	EMB1989,NRPB2,RPB2	DNA-directed RNA polymerase family protein
			Cre02.g075200	#N/A	30785808	Cre02.g075200.t1.1	Cre02.g075200.t1.1
			Cre02.g075250	#N/A	30784805	Cre02.g075250.t1.1	Cre02.g075250.t1.1							AT2G38000.1		chaperone protein dnaJ-related
			Cre02.g075250	#N/A	30784806	Cre02.g075250.t2.1	Cre02.g075250.t2.1							AT2G38000.1		chaperone protein dnaJ-related
			Cre02.g075301	#N/A	30786415	Cre02.g075301.t1.1	Cre02.g075301.t1.1
			Cre02.g075350	#N/A	30784904	Cre02.g075350.t1.2	Cre02.g075350.t1.2	PF00069	PTHR24362,PTHR24362:SF98	KOG0591			GO:0004672,GO:0005524,GO:0006468	AT3G04810.1	ATNEK2,NEK2	NIMA-related kinase 2
			Cre02.g075350	#N/A	30784905	Cre02.g075350.t2.1	Cre02.g075350.t2.1	PF00069	PTHR24362,PTHR24362:SF98	KOG0591			GO:0004672,GO:0005524,GO:0006468	AT3G04810.1	ATNEK2,NEK2	NIMA-related kinase 2
			Cre02.g075350	#N/A	30784903	Cre02.g075350.t3.1	Cre02.g075350.t3.1	PF00069	PTHR24362,PTHR24362:SF98	KOG0591			GO:0004672,GO:0005524,GO:0006468	AT3G04810.1	ATNEK2,NEK2	NIMA-related kinase 2
			Cre02.g075400	#N/A	30785918	Cre02.g075400.t1.1	Cre02.g075400.t1.1	PF04749	PTHR15907,PTHR15907:SF13					AT5G35525.1		PLAC8 family protein
			Cre02.g075400	#N/A	30785919	Cre02.g075400.t2.1	Cre02.g075400.t2.1	PF04749	PTHR15907,PTHR15907:SF13					AT5G35525.1		PLAC8 family protein
			Cre02.g075500	#N/A	30786007	Cre02.g075500.t1.1	Cre02.g075500.t1.1
			Cre02.g075550	#N/A	30785010	Cre02.g075550.t1.2	Cre02.g075550.t1.2	PF09811		KOG4595				AT2G20830.2		transferases;folic acid binding
			Cre02.g075600	#N/A	30786216	Cre02.g075600.t1.1	Cre02.g075600.t1.1	PF00940	PTHR10102	KOG4462	2.7.7.6	K10908	GO:0003677,GO:0003899,GO:0006351	AT5G15700.1		DNA/RNA polymerases superfamily protein
			Cre02.g075650	#N/A	30785327	Cre02.g075650.t1.2	Cre02.g075650.t1.2	PF00076	PTHR14089:SF6,PTHR14089	KOG0153		K12872	GO:0003676	AT1G07360.1		CCCH-type zinc fingerfamily protein with RNA-binding domain
			Cre02.g075676	#N/A	30786463	Cre02.g075676.t1.1	Cre02.g075676.t1.1
			Cre02.g075700	#N/A	30785746	Cre02.g075700.t1.2	Cre02.g075700.t1.2	PF01280	PTHR10722	KOG1696		K02885	GO:0003735,GO:0005622,GO:0005840,GO:0006412	AT3G16780.1		Ribosomal protein L19e family protein
			Cre02.g075750	#N/A	30784863	Cre02.g075750.t1.1	Cre02.g075750.t1.1
			Cre02.g075800	#N/A	30785824	Cre02.g075800.t1.2	Cre02.g075800.t1.2
			Cre02.g075850	#N/A	30785047	Cre02.g075850.t1.1	Cre02.g075850.t1.1	PF00069	PTHR24343,PTHR24343:SF124	KOG0580			GO:0004672,GO:0005524,GO:0006468	AT4G33950.1	ATOST1,OST1,P44,SNRK2-6,SNRK2.6,SRK2E	Protein kinase superfamily protein
			Cre02.g075850	#N/A	30785048	Cre02.g075850.t2.1	Cre02.g075850.t2.1	PF00069	PTHR24343,PTHR24343:SF124	KOG0662			GO:0004672,GO:0005524,GO:0006468	AT4G33950.1	ATOST1,OST1,P44,SNRK2-6,SNRK2.6,SRK2E	Protein kinase superfamily protein
			Cre02.g075900	#N/A	30785470	Cre02.g075900.t1.1	Cre02.g075900.t1.1	PF00069	PTHR24344:SF58,PTHR24344	KOG0583			GO:0004672,GO:0005524,GO:0006468	AT5G66880.1	SNRK2-3,SNRK2.3,SRK2I	sucrose nonfermenting 1(SNF1)-related protein kinase 2.3
			Cre02.g075950	#N/A	30786481	Cre02.g075950.t1.1	Cre02.g075950.t1.1			KOG4462
			Cre02.g075994	#N/A	30785585	Cre02.g075994.t1.2	Cre02.g075994.t1.2
			Cre02.g076000	#N/A	30786339	Cre02.g076000.t1.2	Cre02.g076000.t1.2	PF00069	PTHR24343,PTHR24343:SF120	KOG0583			GO:0004672,GO:0005524,GO:0006468	AT4G33950.1	ATOST1,OST1,P44,SNRK2-6,SNRK2.6,SRK2E	Protein kinase superfamily protein
			Cre02.g076050	#N/A	30786158	Cre02.g076050.t1.2	Cre02.g076050.t1.2	PF00168					GO:0005515	AT1G63220.1		Calcium-dependent lipid-binding (CaLB domain) family protein
			Cre02.g076100	#N/A	30785590	Cre02.g076100.t1.1	Cre02.g076100.t1.1	PF01465					GO:0005515
			Cre02.g076150	#N/A	30785062	Cre02.g076150.t1.2	Cre02.g076150.t1.2	PF09752	PTHR13617,PTHR13617:SF1					AT3G12150.1
			Cre02.g076200	#N/A	30785370	Cre02.g076200.t1.1	Cre02.g076200.t1.1	PF01433	PTHR11533:SF96,PTHR11533	KOG1046	3.4.11.3	K01257	GO:0006508,GO:0008237,GO:0008270	AT4G33090.1	APM1,ATAPM1	aminopeptidase M1
			Cre02.g076250	#N/A	30786008	Cre02.g076250.t1.1	Cre02.g076250.t1.1	PF03144,PF00679,PF03764,PF00009	PTHR23115,PTHR23115:SF84	KOG0465	3.6.5.3	K02355	GO:0005525,GO:0003924	AT1G62750.1	ATSCO1,ATSCO1/CPEF-G,SCO1	Translation elongation factor EFG/EF2 protein
			Cre02.g076300	#N/A	30785008	Cre02.g076300.t1.1	Cre02.g076300.t1.1	PF01208	PTHR21091,PTHR21091:SF2	KOG2872			GO:0004853,GO:0006779	AT3G14930.1	HEME1	Uroporphyrinogen decarboxylase
			Cre02.g076350	#N/A	30785110	Cre02.g076350.t1.2	Cre02.g076350.t1.2	PF02874,PF00306,PF00006	PTHR15184:SF11,PTHR15184	KOG1351	3.6.3.14	K02147	GO:0015992,GO:0016469,GO:0046034,GO:0046933,GO:0046961,GO:0015991,GO:0016820,GO:0033178,GO:0005524	AT4G38510.5		ATPase, V1 complex, subunit B protein
			Cre02.g076400	#N/A	30786086	Cre02.g076400.t1.2	Cre02.g076400.t1.2	PF05871	PTHR13149	KOG4068		K12189		AT4G19003.1	VPS25	E2F/DP family winged-helix DNA-binding domain
			Cre02.g076433	#N/A	30785995	Cre02.g076433.t1.1	Cre02.g076433.t1.1
			Cre02.g076466	#N/A	30785320	Cre02.g076466.t1.1	Cre02.g076466.t1.1
			Cre02.g076500	#N/A	30786298	Cre02.g076500.t1.2	Cre02.g076500.t1.2
			Cre02.g076550	#N/A	30785541	Cre02.g076550.t1.2	Cre02.g076550.t1.2
			Cre02.g076600	#N/A	30785448	Cre02.g076600.t1.2	Cre02.g076600.t1.2	PF01195	PTHR17224	KOG2255	3.1.1.29	K01056	GO:0004045,GO:0006412	AT1G18440.1		Peptidyl-tRNA hydrolase family protein
			Cre02.g076625	#N/A	30786405	Cre02.g076625.t1.1	Cre02.g076625.t1.1	PF07282
			Cre02.g076650	#N/A	30785667	Cre02.g076650.t1.2	Cre02.g076650.t1.2
			Cre02.g076663	#N/A	30785018	Cre02.g076663.t1.2	Cre02.g076663.t1.2
			Cre02.g076700	#N/A	30785959	Cre02.g076700.t1.1	Cre02.g076700.t1.1
			Cre02.g076750	#N/A	30785438	Cre02.g076750.t1.1	Cre02.g076750.t1.1	PF08547	PTHR13194,PTHR13194:SF10					AT1G72420.1		NADH:ubiquinone oxidoreductase intermediate-associated protein 30
			Cre02.g076800	#N/A	30786178	Cre02.g076800.t1.2	Cre02.g076800.t1.2	PF01222	PTHR21257,PTHR21257:SF26	KOG1435	1.3.1.70	K00222	GO:0016020	AT3G52940.1	ELL1,FK,HYD2	Ergosterol biosynthesis ERG4/ERG24 family
			Cre02.g076850	#N/A	30785644	Cre02.g076850.t1.2	Cre02.g076850.t1.2	PF00400	PTHR22847,PTHR22847:SF104	KOG0322				AT4G29860.1	EMB2757,TAN	Transducin/WD40 repeat-like superfamily protein
			Cre02.g076900	#N/A	30786441	Cre02.g076900.t1.1	Cre02.g076900.t1.1	PF00069,PF00027	PTHR24353:SF84,PTHR24353	KOG0614	2.7.11.11	K04345	GO:0004672,GO:0005524,GO:0006468	AT3G08720.1	ATPK19,ATPK2,ATS6K2,S6K2	serine/threonine protein kinase 2
			Cre02.g076950	#N/A	30785616	Cre02.g076950.t1.1	Cre02.g076950.t1.1	PF00082,PF02225	PTHR10795,PTHR10795:SF84				GO:0004252,GO:0006508	AT5G59120.1	ATSBT4.13,SBT4.13	subtilase 4.13
			Cre02.g076987	#N/A	30786328	Cre02.g076987.t1.1	Cre02.g076987.t1.1	PF03330						AT2G03090.1	ATEXP15,ATEXPA15,ATHEXP ALPHA 1.3,EXP15,EXPA15	expansin A15
			Cre02.g077024	#N/A	30784901	Cre02.g077024.t1.1	Cre02.g077024.t1.1			KOG4462
			Cre02.g077061	#N/A	30786485	Cre02.g077061.t1.1	Cre02.g077061.t1.1	PF00892					GO:0016020
			Cre02.g077100	#N/A	30785552	Cre02.g077100.t1.2	Cre02.g077100.t1.2	PF04107			6.3.2.2	K01919	GO:0004357,GO:0006750	AT4G23100.1	ATECS1,CAD2,GSH1,GSHA,PAD2,RML1	glutamate-cysteine ligase
			Cre02.g077150	#N/A	30785825	Cre02.g077150.t1.1	Cre02.g077150.t1.1	PF05684						AT5G52540.1		Protein of unknown function (DUF819)
			Cre02.g077200	#N/A	30784829	Cre02.g077200.t1.2	Cre02.g077200.t1.2
			Cre02.g077250	#N/A	30784834	Cre02.g077250.t1.1	Cre02.g077250.t1.1	PF03372
			Cre02.g077300	#N/A	30785723	Cre02.g077300.t1.2	Cre02.g077300.t1.2	PF01269	PTHR10335	KOG1596	2.1.1.-	K14563	GO:0003723,GO:0006364,GO:0008033,GO:0008168	AT4G25630.1	ATFIB2,FIB2	fibrillarin 2
			Cre02.g077350	#N/A	30786207	Cre02.g077350.t1.2	Cre02.g077350.t1.2	PF00815	PTHR21256:SF2,PTHR21256	KOG2697	1.1.1.23	K00013	GO:0000105,GO:0004399,GO:0008270,GO:0051287,GO:0055114	AT5G63890.1	ATHDH,HDH,HISN8	histidinol dehydrogenase
			Cre02.g077401	#N/A	30785455	Cre02.g077401.t1.1	Cre02.g077401.t1.1
			Cre02.g077451	#N/A	30785895	Cre02.g077451.t1.1	Cre02.g077451.t1.1	PF00561	PTHR10992,PTHR10992:SF228	KOG4178				AT5G53050.2		alpha/beta-Hydrolases superfamily protein
			Cre02.g077500	#N/A	30784854	Cre02.g077500.t1.2	Cre02.g077500.t1.2	PF04099	PTHR23249,PTHR23249:SF2	KOG3368			GO:0005801,GO:0006888	AT5G02280.1		SNARE-like superfamily protein
			Cre02.g077550	#N/A	30786064	Cre02.g077550.t1.2	Cre02.g077550.t1.2
			Cre02.g077550	#N/A	30786065	Cre02.g077550.t2.1	Cre02.g077550.t2.1
			Cre02.g077600	#N/A	30785100	Cre02.g077600.t1.2	Cre02.g077600.t1.2			KOG4787
			Cre02.g077650	#N/A	30785674	Cre02.g077650.t1.2	Cre02.g077650.t1.2	PF00782	PTHR23339,PTHR23339:SF35				GO:0006470,GO:0008138
			Cre02.g077700	#N/A	30785318	Cre02.g077700.t1.1	Cre02.g077700.t1.1	PF00566	PTHR22957:SF51,PTHR22957	KOG2058			GO:0005097,GO:0005622,GO:0032313	AT3G55020.1		Ypt/Rab-GAP domain of gyp1p superfamily protein
			Cre02.g077750	#N/A	30786431	Cre02.g077750.t1.2	Cre02.g077750.t1.2
			Cre02.g077800	#N/A	30785888	Cre02.g077800.t1.2	Cre02.g077800.t1.2
			Cre02.g077850	#N/A	30785838	Cre02.g077850.t1.2	Cre02.g077850.t1.2
			Cre02.g077900	#N/A	30784853	Cre02.g077900.t1.1	Cre02.g077900.t1.1
			Cre02.g077925	#N/A	30785649	Cre02.g077925.t1.1	Cre02.g077925.t1.1
			Cre02.g077951	#N/A	30784920	Cre02.g077951.t1.1	Cre02.g077951.t1.1	PF00005	PTHR19229				GO:0005524,GO:0016887	AT3G47780.1	ATATH6,ATH6	ABC2 homolog 6
			Cre02.g077976	#N/A	30785818	Cre02.g077976.t1.1	Cre02.g077976.t1.1		PTHR23050:SF89,PTHR23050
			Cre02.g078000	#N/A	30785407	Cre02.g078000.t1.1	Cre02.g078000.t1.1
			Cre02.g078050	#N/A	30786388	Cre02.g078050.t1.2	Cre02.g078050.t1.2		PTHR23050:SF89,PTHR23050
			Cre02.g078100	#N/A	30785567	Cre02.g078100.t1.1	Cre02.g078100.t1.1	PF01588,PF03144,PF11987,PF00009	PTHR23115:SF41,PTHR23115	KOG1144		K03243	GO:0000049,GO:0005525,GO:0003924	AT1G76810.1		eukaryotic translation initiation factor 2 (eIF-2) family protein
			Cre02.g078150	#N/A	30785763	Cre02.g078150.t1.1	Cre02.g078150.t1.1	PF00400,PF00439	PTHR16266,PTHR16266:SF17	KOG0644			GO:0005515	AT5G49430.1		WD40/YVTN repeat-like-containing domain;Bromodomain
			Cre02.g078200	#N/A	30784975	Cre02.g078200.t1.1	Cre02.g078200.t1.1
			Cre02.g078200	#N/A	30784976	Cre02.g078200.t2.1	Cre02.g078200.t2.1
			Cre02.g078200	#N/A	30784977	Cre02.g078200.t3.1	Cre02.g078200.t3.1
			Cre02.g078226	#N/A	30785334	Cre02.g078226.t1.1	Cre02.g078226.t1.1
			Cre02.g078226	#N/A	30785333	Cre02.g078226.t2.1	Cre02.g078226.t2.1
			Cre02.g078251	#N/A	30785054	Cre02.g078251.t1.1	Cre02.g078251.t1.1
			Cre02.g078300	#N/A	30785028	Cre02.g078300.t1.1	Cre02.g078300.t1.1		PTHR11592				GO:0004602,GO:0006979,GO:0055114	AT4G11600.1	ATGPX6,GPX6,LSC803,PHGPX	glutathione peroxidase 6
			Cre02.g078316	#N/A	30786203	Cre02.g078316.t1.2	Cre02.g078316.t1.2
			Cre02.g078350	#N/A	30785440	Cre02.g078350.t1.2	Cre02.g078350.t1.2
			Cre02.g078400	#N/A	30785468	Cre02.g078400.t1.1	Cre02.g078400.t1.1	PF01062		KOG1073
			Cre02.g078450	#N/A	30786446	Cre02.g078450.t1.1	Cre02.g078450.t1.1
			Cre02.g078476	#N/A	30785476	Cre02.g078476.t1.1	Cre02.g078476.t1.1
			Cre02.g078500	#N/A	30784886	Cre02.g078500.t1.2	Cre02.g078500.t1.2
			Cre02.g078507	#N/A	30785671	Cre02.g078507.t1.2	Cre02.g078507.t1.2
			Cre02.g078550	#N/A	30785213	Cre02.g078550.t1.2	Cre02.g078550.t1.2
			Cre02.g078600	#N/A	30786233	Cre02.g078600.t1.2	Cre02.g078600.t1.2
			Cre02.g078650	#N/A	30785274	Cre02.g078650.t1.1	Cre02.g078650.t1.1	PF07687,PF01546	PTHR11014:SF15,PTHR11014	KOG2276			GO:0016787,GO:0008152	AT1G44820.1		Peptidase M20/M25/M40 family protein
			Cre02.g078700	#N/A	30786445	Cre02.g078700.t1.1	Cre02.g078700.t1.1	PF02373	PTHR10694,PTHR10694:SF7	KOG0958	1.14.11.-	K06709		AT1G63490.1		transcription factor jumonji (jmjC) domain-containing protein
			Cre02.g078750	#N/A	30785017	Cre02.g078750.t1.1	Cre02.g078750.t1.1	PF01479,PF00849	PTHR10436				GO:0003723,GO:0001522,GO:0009451,GO:0009982	AT1G76050.2		Pseudouridine synthase family protein
			Cre02.g078777	#N/A	30785515	Cre02.g078777.t1.1	Cre02.g078777.t1.1	PF12499
			Cre02.g078804	#N/A	30786495	Cre02.g078804.t1.1	Cre02.g078804.t1.1	PF12499
			Cre02.g078831	#N/A	30785284	Cre02.g078831.t1.1	Cre02.g078831.t1.1	PF00313					GO:0003677,GO:0006355
			Cre02.g078858	#N/A	30786287	Cre02.g078858.t1.1	Cre02.g078858.t1.1	PF01080	PTHR10202	KOG2736	3.4.23.-	K04505	GO:0004190,GO:0016021	AT1G08700.1	PS1	Presenilin-1
			Cre02.g078885	#N/A	30785931	Cre02.g078885.t1.1	Cre02.g078885.t1.1	PF03810	PTHR10997:SF7,PTHR10997	KOG1993			GO:0006886,GO:0008565	AT3G08960.1		ARM repeat superfamily protein
			Cre02.g078912	#N/A	30785183	Cre02.g078912.t1.1	Cre02.g078912.t1.1
			Cre02.g078939	#N/A	30785814	Cre02.g078939.t1.1	Cre02.g078939.t1.1	PF03441,PF00875	PTHR11455	KOG0133	4.1.99.3	K01669	GO:0003913,GO:0006281	AT5G24850.1	CRY3	cryptochrome 3
			Cre02.g078950	#N/A	30785993	Cre02.g078950.t1.1	Cre02.g078950.t1.1	PF05548
			Cre02.g078966	#N/A	30784942	Cre02.g078966.t1.1	Cre02.g078966.t1.1	PF01434,PF00004	PTHR23076:SF6,PTHR23076	KOG0734	3.4.24.-	K03798	GO:0004222,GO:0005524,GO:0006508	AT3G47060.1	ftsh7	FTSH protease 7
			Cre02.g079000	#N/A	30786371	Cre02.g079000.t1.2	Cre02.g079000.t1.2
			Cre02.g079003	#N/A	30785625	Cre02.g079003.t1.1	Cre02.g079003.t1.1
			Cre02.g079004	#N/A	30785040	Cre02.g079004.t1.1	Cre02.g079004.t1.1
			Cre02.g079005	#N/A	30785019	Cre02.g079005.t1.1	Cre02.g079005.t1.1
			Cre02.g079050	#N/A	30785804	Cre02.g079050.t1.1	Cre02.g079050.t1.1	PF03982	PTHR12317	KOG0831			GO:0016747	AT3G51520.1		diacylglycerol acyltransferase family
			Cre02.g079100	#N/A	30784881	Cre02.g079100.t1.1	Cre02.g079100.t1.1
			Cre02.g079100	#N/A	30784882	Cre02.g079100.t2.1	Cre02.g079100.t2.1
			Cre02.g079150	#N/A	30785592	Cre02.g079150.t1.1	Cre02.g079150.t1.1	PF03031	PTHR12083,PTHR12083:SF5				GO:0005515	AT5G01310.1	APTX	APRATAXIN-like
			Cre02.g079200	#N/A	30786315	Cre02.g079200.t1.2	Cre02.g079200.t1.2	PF00808	PTHR11064,PTHR11064:SF9	KOG0871			GO:0005622,GO:0043565,GO:0003677	AT4G14540.1	NF-YB3	nuclear factor Y, subunit B3
			Cre02.g079250	#N/A	30785082	Cre02.g079250.t1.1	Cre02.g079250.t1.1							AT1G15660.1	CENP-C	centromere protein C
			Cre02.g079300	#N/A	30786252	Cre02.g079300.t1.2	Cre02.g079300.t1.2	PF04212,PF09336,PF00004	PTHR23074:SF3,PTHR23074	KOG0739		K12196	GO:0005524	AT2G27600.1	ATSKD1,SKD1,VPS4	AAA-type ATPase family protein
			Cre02.g079351	#N/A	30786087	Cre02.g079351.t1.1	Cre02.g079351.t1.1
			Cre02.g079400	#N/A	30785182	Cre02.g079400.t1.2	Cre02.g079400.t1.2	PF00076	PTHR24012				GO:0003676	AT4G19610.1		nucleotide binding;nucleic acid binding;RNA binding
			Cre02.g079450	#N/A	30785304	Cre02.g079450.t1.1	Cre02.g079450.t1.1
			Cre02.g079500	#N/A	30786295	Cre02.g079500.t1.1	Cre02.g079500.t1.1		PTHR24420
			Cre02.g079550	#N/A	30786344	Cre02.g079550.t1.2	Cre02.g079550.t1.2	PF01031,PF02212	PTHR11566:SF64,PTHR11566				GO:0005525,GO:0003924	AT1G59610.1	ADL3,CF1,DL3,DRP2B	dynamin-like 3
			Cre02.g079600	#N/A	30785296	Cre02.g079600.t1.2	Cre02.g079600.t1.2	PF01409,PF03147	PTHR11538,PTHR11538:SF16	KOG2783	6.1.1.20	K01889	GO:0000049,GO:0004812,GO:0005524,GO:0005737,GO:0043039,GO:0000287,GO:0004826,GO:0006432,GO:0008033	AT3G58140.1		phenylalanyl-tRNA synthetase class IIc family protein
			Cre02.g079650	#N/A	30785784	Cre02.g079650.t1.1	Cre02.g079650.t1.1	PF00892	PTHR22911:SF6,PTHR22911	KOG4510			GO:0016020
			Cre02.g079700	#N/A	30785449	Cre02.g079700.t1.2	Cre02.g079700.t1.2	PF00185,PF02729	PTHR11405	KOG1504	2.1.3.2	K00609	GO:0006520,GO:0016597,GO:0016743	AT3G20330.1	PYRB	PYRIMIDINE B
			Cre02.g079750	#N/A	30784947	Cre02.g079750.t1.1	Cre02.g079750.t1.1	PF00512,PF00072,PF02518	PTHR24423				GO:0000155,GO:0007165,GO:0016020,GO:0000156,GO:0000160,GO:0006355,GO:0005524	AT5G10720.1	AHK5,CKI2,HK5	histidine kinase 5
			Cre02.g079800	#N/A	30785764	Cre02.g079800.t1.2	Cre02.g079800.t1.2
			Cre02.g079850	#N/A	30786088	Cre02.g079850.t1.1	Cre02.g079850.t1.1	PF00817,PF11799	PTHR11076,PTHR11076:SF12	KOG2094	2.7.7.7	K03511	GO:0003684,GO:0003887,GO:0006281	AT1G49980.1		DNA/RNA polymerases superfamily protein
			Cre02.g079926	#N/A	30785186	Cre02.g079926.t1.1	Cre02.g079926.t1.1	PF12499		KOG2992				AT2G10940.1		Bifunctional inhibitor/lipid-transfer protein/seed storage 2S albumin superfamily protein
			Cre02.g080000	#N/A	30785367	Cre02.g080000.t1.2	Cre02.g080000.t1.2
			Cre02.g080050	#N/A	30786095	Cre02.g080050.t1.2	Cre02.g080050.t1.2	PF00645					GO:0003677,GO:0008270
			Cre02.g080100	#N/A	30785663	Cre02.g080100.t1.1	Cre02.g080100.t1.1	PF00753,PF07521,PF10996	PTHR11203:SF8,PTHR11203	KOG1136	3.1.27.-	K13148	GO:0016787	AT2G01730.1	ATCPSF73-II,CPSF73-II,EDA26	cleavage and polyadenylation specificity factor 73 kDa subunit-II
			Cre02.g080150	#N/A	30786362	Cre02.g080150.t1.1	Cre02.g080150.t1.1
			Cre02.g080200	#N/A	30786367	Cre02.g080200.t1.2	Cre02.g080200.t1.2	PF02779,PF02780,PF00456	PTHR11624:SF1,PTHR11624	KOG0523	2.2.1.1	K00615	GO:0003824,GO:0008152	AT3G60750.1		Transketolase
			Cre02.g080250	#N/A	30785799	Cre02.g080250.t1.2	Cre02.g080250.t1.2	PF02325					GO:0016020	AT4G27990.1	ATYLMG1-2,YLMG1-2	YGGT family protein
			Cre02.g080300	#N/A	30784793	Cre02.g080300.t1.2	Cre02.g080300.t1.2		PTHR12950,PTHR12950:SF17					AT1G55325.2	GCT	RNA polymerase II transcription mediators
			Cre02.g080350	#N/A	30786066	Cre02.g080350.t1.1	Cre02.g080350.t1.1	PF02148,PF00443,PF00627	PTHR24006,PTHR24006:SF260		3.1.2.15	K11836	GO:0008270,GO:0004221,GO:0006511,GO:0005515	AT3G20630.1	ATUBP14,PER1,TTN6,UBP14	ubiquitin-specific protease 14
			Cre02.g080400	#N/A	30785643	Cre02.g080400.t1.1	Cre02.g080400.t1.1
			Cre02.g080450	#N/A	30786373	Cre02.g080450.t1.2	Cre02.g080450.t1.2
			Cre02.g080500	#N/A	30785851	Cre02.g080500.t1.2	Cre02.g080500.t1.2	PF00201	PTHR11926,PTHR11926:SF16	KOG1192			GO:0008152,GO:0016758
			Cre02.g080550	#N/A	30784810	Cre02.g080550.t1.1	Cre02.g080550.t1.1	PF00012,PF00233	PTHR11347:SF75,PTHR11347				GO:0004114,GO:0007165	AT3G09440.1		Heat shock protein 70 (Hsp 70) family protein
			Cre02.g080600	#N/A	30785719	Cre02.g080600.t1.2	Cre02.g080600.t1.2	PF00012	PTHR19375	KOG0100		K09490	GO:0005524	AT5G42020.1	BIP,BIP2	Heat shock protein 70 (Hsp 70) family protein
			Cre02.g080650	#N/A	30784948	Cre02.g080650.t1.2	Cre02.g080650.t1.2	PF02518,PF00183	PTHR11528:SF36,PTHR11528	KOG0020		K04079	GO:0005524,GO:0006457,GO:0006950,GO:0051082	AT2G04030.1	AtHsp90.5,CR88,EMB1956,Hsp88.1,HSP90.5	Chaperone protein htpG family protein
			Cre02.g080700	#N/A	30785571	Cre02.g080700.t1.2	Cre02.g080700.t1.2	PF00012	PTHR19375	KOG0100		K09490	GO:0005524	AT5G42020.1	BIP,BIP2	Heat shock protein 70 (Hsp 70) family protein
			Cre02.g080750	#N/A	30786116	Cre02.g080750.t1.2	Cre02.g080750.t1.2							AT2G47070.1	SPL1	squamosa promoter binding protein-like 1
			Cre02.g080800	#N/A	30785911	Cre02.g080800.t1.2	Cre02.g080800.t1.2
			Cre02.g080850	#N/A	30785155	Cre02.g080850.t1.2	Cre02.g080850.t1.2	PF01549						AT4G17070.1		peptidyl-prolyl cis-trans isomerases
			Cre02.g080900	#N/A	30785998	Cre02.g080900.t1.2	Cre02.g080900.t1.2	PF08534	PTHR10430	KOG0541			GO:0016491	AT3G06050.1	ATPRXIIF,PRXIIF	peroxiredoxin IIF
			Cre02.g080950	#N/A	30786130	Cre02.g080950.t1.2	Cre02.g080950.t1.2
			Cre02.g081000	#N/A	30784933	Cre02.g081000.t1.2	Cre02.g081000.t1.2	PF00929						AT5G25800.1		Polynucleotidyl transferase, ribonuclease H-like superfamily protein
			Cre02.g081050	#N/A	30785944	Cre02.g081050.t1.2	Cre02.g081050.t1.2							AT1G65900.1
			Cre02.g081100	#N/A	30786422	Cre02.g081100.t1.2	Cre02.g081100.t1.2	PF02893
			Cre02.g081150	#N/A	30785640	Cre02.g081150.t1.1	Cre02.g081150.t1.1
			Cre02.g081176	#N/A	30785613	Cre02.g081176.t1.2	Cre02.g081176.t1.2	PF00588	PTHR12029,PTHR12029:SF27				GO:0003723,GO:0006396,GO:0008173
			Cre02.g081176	#N/A	30785614	Cre02.g081176.t2.1	Cre02.g081176.t2.1	PF00588	PTHR12029,PTHR12029:SF27				GO:0003723,GO:0006396,GO:0008173
			Cre02.g081200	#N/A	30786391	Cre02.g081200.t1.2	Cre02.g081200.t1.2	PF03029	PTHR21231,PTHR21231:SF3	KOG1533		K06883	GO:0000166	AT5G22370.1	EMB1705,QQT1	P-loop containing nucleoside triphosphate hydrolases superfamily protein
			Cre02.g081250	#N/A	30785406	Cre02.g081250.t1.2	Cre02.g081250.t1.2							AT3G46780.1	PTAC16	plastid transcriptionally active 16
			Cre02.g081300	#N/A	30786107	Cre02.g081300.t1.1	Cre02.g081300.t1.1	PF00293	PTHR12992				GO:0016787	AT1G28960.2	ATNUDT15,ATNUDX15,NUDX15	nudix hydrolase homolog 15
			Cre02.g081350	#N/A	30785705	Cre02.g081350.t1.1	Cre02.g081350.t1.1	PF00857	PTHR11080				GO:0003824,GO:0008152
			Cre02.g081400	#N/A	30786372	Cre02.g081400.t1.2	Cre02.g081400.t1.2	PF01063	PTHR11825:SF2,PTHR11825	KOG0975			GO:0004084,GO:0009081,GO:0003824,GO:0008152	AT1G50090.1		D-aminoacid aminotransferase-like PLP-dependent enzymes superfamily protein
			Cre02.g081450	#N/A	30785504	Cre02.g081450.t1.2	Cre02.g081450.t1.2							AT4G23620.2		Ribosomal protein L25/Gln-tRNA synthetase, anti-codon-binding domain
			Cre02.g081500	#N/A	30786154	Cre02.g081500.t1.2	Cre02.g081500.t1.2	PF08449	PTHR10778:SF8,PTHR10778	KOG1582			GO:0055085	AT4G23010.1	ATUTR2,UTR2	UDP-galactose transporter 2
			Cre02.g081550	#N/A	30786407	Cre02.g081550.t1.2	Cre02.g081550.t1.2	PF00004	PTHR12595	KOG3347	2.7.4.3	K14535	GO:0005524	AT5G60340.1		P-loop containing nucleoside triphosphate hydrolases superfamily protein
			Cre02.g081600	#N/A	30785485	Cre02.g081600.t1.1	Cre02.g081600.t1.1	PF03171	PTHR10869				GO:0016491	AT5G18900.1		2-oxoglutarate (2OG) and Fe(II)-dependent oxygenase superfamily protein
			Cre02.g081650	#N/A	30784984	Cre02.g081650.t1.2	Cre02.g081650.t1.2							AT3G28720.1
			Cre02.g081700	#N/A	30785765	Cre02.g081700.t1.1	Cre02.g081700.t1.1	PF12499
			Cre02.g081750	#N/A	30785185	Cre02.g081750.t1.1	Cre02.g081750.t1.1
			Cre02.g081800	#N/A	30785815	Cre02.g081800.t1.2	Cre02.g081800.t1.2	PF00211	PTHR11017				GO:0009190,GO:0016849,GO:0035556
			Cre02.g081850	#N/A	30786253	Cre02.g081850.t1.1	Cre02.g081850.t1.1
			Cre02.g081900	#N/A	30785729	Cre02.g081900.t1.2	Cre02.g081900.t1.2
			Cre02.g082000	#N/A	30784958	Cre02.g082000.t1.2	Cre02.g082000.t1.2	PF00730	PTHR10359,PTHR10359:SF1		3.2.2.-	K03575	GO:0006284	AT4G12740.1		HhH-GPD base excision DNA repair family protein
			Cre02.g082050	#N/A	30785948	Cre02.g082050.t1.1	Cre02.g082050.t1.1	PF04502	PTHR12111	KOG2990		K13115		AT1G25682.1		Family of unknown function (DUF572)
			Cre02.g082100	#N/A	30785606	Cre02.g082100.t1.1	Cre02.g082100.t1.1
			Cre02.g082150	#N/A	30785708	Cre02.g082150.t1.1	Cre02.g082150.t1.1		PTHR20861:SF1,PTHR20861					AT2G17265.1	DMR1,HSK	homoserine kinase
			Cre02.g082200	#N/A	30785317	Cre02.g082200.t1.1	Cre02.g082200.t1.1	PF08544,PF00288	PTHR20861:SF1,PTHR20861				GO:0005524,GO:0016301,GO:0016310	AT2G17265.1	DMR1,HSK	homoserine kinase
			Cre02.g082250	#N/A	30786284	Cre02.g082250.t1.1	Cre02.g082250.t1.1	PF08544,PF00288	PTHR20861:SF1,PTHR20861	KOG1537	2.7.1.39	K00872	GO:0005524,GO:0016301,GO:0016310	AT2G17265.1	DMR1,HSK	homoserine kinase
			Cre02.g082300	#N/A	30785962	Cre02.g082300.t1.2	Cre02.g082300.t1.2	PF04935	PTHR14369					AT5G05210.1		Surfeit locus protein 6
			Cre02.g082350	#N/A	30785190	Cre02.g082350.t1.1	Cre02.g082350.t1.1	PF03091	PTHR23419	KOG3338		K03926	GO:0010038	AT2G33740.2	CUTA	Nitrogen regulatory PII-like, alpha/beta
			Cre02.g082350	#N/A	30785191	Cre02.g082350.t2.1	Cre02.g082350.t2.1	PF03091	PTHR23419	KOG3338		K03926	GO:0010038	AT2G33740.2	CUTA	Nitrogen regulatory PII-like, alpha/beta
			Cre02.g082400	#N/A	30786206	Cre02.g082400.t1.1	Cre02.g082400.t1.1	PF00443					GO:0004221,GO:0006511
			Cre02.g082450	#N/A	30785632	Cre02.g082450.t1.2	Cre02.g082450.t1.2
			Cre02.g082500	#N/A	30786029	Cre02.g082500.t1.1	Cre02.g082500.t1.1	PF05479				K02701	GO:0005516,GO:0009522,GO:0015979,GO:0042651	AT5G64040.1	PSAN	photosystem I reaction center subunit PSI-N, chloroplast, putative / PSI-N, putative (PSAN)
			Cre02.g082550	#N/A	30785220	Cre02.g082550.t1.2	Cre02.g082550.t1.2	PF00498,PF01494	PTHR13789:SF10,PTHR13789	KOG2614	1.14.13.90	K09838	GO:0005515,GO:0004497,GO:0055114	AT5G67030.1	ABA1,ATABA1,ATZEP,IBS3,LOS6,NPQ2,ZEP	zeaxanthin epoxidase (ZEP) (ABA1)
			Cre02.g082576	#N/A	30785011	Cre02.g082576.t1.1	Cre02.g082576.t1.1
			Cre02.g082600	#N/A	30786056	Cre02.g082600.t1.1	Cre02.g082600.t1.1
			Cre02.g082651	#N/A	30784792	Cre02.g082651.t1.1	Cre02.g082651.t1.1
			Cre02.g082700	#N/A	30785870	Cre02.g082700.t1.2	Cre02.g082700.t1.2	PF02628	PTHR23289	KOG2725		K02259	GO:0006461,GO:0016020	AT5G56090.1	COX15	cytochrome c oxidase 15
			Cre02.g082750	#N/A	30785435	Cre02.g082750.t1.2	Cre02.g082750.t1.2	PF06596					GO:0009523,GO:0015979,GO:0016020	AT2G06520.1	PSBX	photosystem II subunit X
			Cre02.g082800	#N/A	30786148	Cre02.g082800.t1.2	Cre02.g082800.t1.2	PF07460					GO:0004519
			Cre02.g082825	#N/A	30785093	Cre02.g082825.t1.1	Cre02.g082825.t1.1	PF00587	PTHR11778				GO:0000166,GO:0004828,GO:0005524,GO:0005737,GO:0006412,GO:0006434,GO:0004812,GO:0006418	AT1G11870.2	ATSRS,OVA7,SRS	Seryl-tRNA synthetase
			Cre02.g082852	#N/A	30786278	Cre02.g082852.t1.1	Cre02.g082852.t1.1	PF06596					GO:0009523,GO:0015979,GO:0016020	AT2G06520.1	PSBX	photosystem II subunit X
			Cre02.g082877	#N/A	30784992	Cre02.g082877.t1.1	Cre02.g082877.t1.1	PF07460,PF00587,PF02403	PTHR11778	KOG2509	6.1.1.11	K01875	GO:0004519,GO:0000166,GO:0004828,GO:0005524,GO:0005737,GO:0006412,GO:0006434,GO:0004812,GO:0006418	AT1G11870.2	ATSRS,OVA7,SRS	Seryl-tRNA synthetase
			Cre02.g082900	#N/A	30786354	Cre02.g082900.t1.1	Cre02.g082900.t1.1	PF01733	PTHR10332,PTHR10332:SF3				GO:0005337,GO:0006810,GO:0016020	AT1G02630.1		Nucleoside transporter family protein
			Cre02.g082950	#N/A	30785650	Cre02.g082950.t1.1	Cre02.g082950.t1.1	PF03407	PTHR24633:SF6,PTHR24633
			Cre02.g083000	#N/A	30786150	Cre02.g083000.t1.2	Cre02.g083000.t1.2
			Cre02.g083050	#N/A	30785434	Cre02.g083050.t1.1	Cre02.g083050.t1.1	PF00023	PTHR24198:SF302,PTHR24198				GO:0005515	AT4G19150.1		Ankyrin repeat family protein
			Cre02.g083065	#N/A	30785137	Cre02.g083065.t1.2	Cre02.g083065.t1.2	PF00557,PF05195	PTHR10804,PTHR10804:SF17	KOG2737			GO:0009987,GO:0004177,GO:0030145	AT4G29490.1		Metallopeptidase M24 family protein
			Cre02.g083100	#N/A	30786067	Cre02.g083100.t1.2	Cre02.g083100.t1.2	PF00188	PTHR10334	KOG3017				AT5G57625.1		CAP (Cysteine-rich secretory proteins, Antigen 5, and Pathogenesis-related 1 protein) superfamily protein
			Cre02.g083180	#N/A	30784924	Cre02.g083180.t1.1	Cre02.g083180.t1.1
			Cre02.g083259	#N/A	30786290	Cre02.g083259.t1.2	Cre02.g083259.t1.2
			Cre02.g083273	#N/A	30785964	Cre02.g083273.t1.2	Cre02.g083273.t1.2
			Cre02.g083300	#N/A	30785121	Cre02.g083300.t1.1	Cre02.g083300.t1.1
			Cre02.g083350	#N/A	30785813	Cre02.g083350.t1.1	Cre02.g083350.t1.1	PF07460					GO:0004519
			Cre02.g083354	#N/A	30785555	Cre02.g083354.t1.2	Cre02.g083354.t1.2	PF00664,PF00005	PTHR24221,PTHR24221:SF119	KOG0058		K05656	GO:0005524,GO:0006810,GO:0016021,GO:0042626,GO:0055085,GO:0016887	AT1G70610.1	ATTAP1,TAP1	transporter associated with antigen processing protein 1
			Cre02.g083354	#N/A	30785556	Cre02.g083354.t2.1	Cre02.g083354.t2.1	PF00664,PF00005	PTHR24221,PTHR24221:SF119	KOG0058		K05656	GO:0005524,GO:0006810,GO:0016021,GO:0042626,GO:0055085,GO:0016887	AT1G70610.1	ATTAP1,TAP1	transporter associated with antigen processing protein 1
			Cre02.g083400	#N/A	30786471	Cre02.g083400.t1.1	Cre02.g083400.t1.1	PF07000	PTHR13379	KOG4529				AT1G73380.1
			Cre02.g083450	#N/A	30785313	Cre02.g083450.t1.1	Cre02.g083450.t1.1	PF01494	PTHR13789:SF70,PTHR13789				GO:0004497,GO:0055114
			Cre02.g083500	#N/A	30786224	Cre02.g083500.t1.2	Cre02.g083500.t1.2	PF01494	PTHR13789,PTHR13789:SF71				GO:0004497,GO:0055114
			Cre02.g083550	#N/A	30785425	Cre02.g083550.t1.1	Cre02.g083550.t1.1	PF01494	PTHR13789,PTHR13789:SF72	KOG2614			GO:0004497,GO:0055114
			Cre02.g083600	#N/A	30786218	Cre02.g083600.t1.2	Cre02.g083600.t1.2	PF06071,PF01926	PTHR23305	KOG1491			GO:0005525,GO:0005622	AT1G30580.1		GTP binding
			Cre02.g083600	#N/A	30786217	Cre02.g083600.t2.1	Cre02.g083600.t2.1	PF06071,PF01926	PTHR23305	KOG1491			GO:0005525,GO:0005622	AT1G30580.1		GTP binding
			Cre02.g083650	#N/A	30785214	Cre02.g083650.t1.1	Cre02.g083650.t1.1
			Cre02.g083800	#N/A	30785208	Cre02.g083800.t1.2	Cre02.g083800.t1.2	PF01370	PTHR10366,PTHR10366:SF2	KOG0747	4.2.1.76	K12450	GO:0003824,GO:0044237,GO:0050662	AT1G78570.1	ATRHM1,RHM1,ROL1	rhamnose biosynthesis 1
			Cre02.g083800	#N/A	30785209	Cre02.g083800.t2.1	Cre02.g083800.t2.1	PF01370	PTHR10366,PTHR10366:SF2	KOG0747	4.2.1.76	K12450	GO:0003824,GO:0044237,GO:0050662	AT1G78570.1	ATRHM1,RHM1,ROL1	rhamnose biosynthesis 1
			Cre02.g083850	#N/A	30785494	Cre02.g083850.t1.1	Cre02.g083850.t1.1							AT1G74530.3
			Cre02.g083850	#N/A	30785495	Cre02.g083850.t2.1	Cre02.g083850.t2.1							AT1G74530.3
			Cre02.g083900	#N/A	30786271	Cre02.g083900.t1.1	Cre02.g083900.t1.1	PF01612,PF04073,PF01927	PTHR12124,PTHR12124:SF14				GO:0003676,GO:0005622,GO:0006139,GO:0008408	AT1G56310.1		Polynucleotidyl transferase, ribonuclease H-like superfamily protein
			Cre02.g083900	#N/A	30786272	Cre02.g083900.t2.1	Cre02.g083900.t2.1	PF01612,PF04073,PF01927	PTHR12124,PTHR12124:SF14				GO:0003676,GO:0005622,GO:0006139,GO:0008408	AT1G56310.1		Polynucleotidyl transferase, ribonuclease H-like superfamily protein
			Cre02.g083935	#N/A	30786449	Cre02.g083935.t1.2	Cre02.g083935.t1.2
			Cre02.g083950	#N/A	30785522	Cre02.g083950.t1.1	Cre02.g083950.t1.1	PF04839					GO:0003735,GO:0005622,GO:0005840,GO:0006412,GO:0009536	AT5G15760.1		Ribosomal protein PSRP-3/Ycf65
			Cre02.g084000	#N/A	30785732	Cre02.g084000.t1.2	Cre02.g084000.t1.2
			Cre02.g084050	#N/A	30784944	Cre02.g084050.t1.2	Cre02.g084050.t1.2	PF03839	PTHR12443:SF9,PTHR12443			K12275	GO:0008565,GO:0015031,GO:0016021	AT3G20920.1		translocation protein-related
			Cre02.g084100	#N/A	30785595	Cre02.g084100.t1.2	Cre02.g084100.t1.2		PTHR23125					AT1G80630.1		RNI-like superfamily protein
			Cre02.g084150	#N/A	30784830	Cre02.g084150.t1.1	Cre02.g084150.t1.1		PTHR24420,PTHR24420:SF496					AT1G58190.1	AtRLP9,RLP9	receptor like protein 9
			Cre02.g084176	#N/A	30785431	Cre02.g084176.t1.1	Cre02.g084176.t1.1
			Cre02.g084200	#N/A	30786364	Cre02.g084200.t1.2	Cre02.g084200.t1.2
			Cre02.g084250	#N/A	30785034	Cre02.g084250.t1.2	Cre02.g084250.t1.2	PF00481	PTHR13832,PTHR13832:SF143	KOG0698			GO:0003824	AT5G53140.1		Protein phosphatase 2C family protein
			Cre02.g084250	#N/A	30785035	Cre02.g084250.t2.1	Cre02.g084250.t2.1	PF00481	PTHR13832,PTHR13832:SF143	KOG0698			GO:0003824	AT5G53140.1		Protein phosphatase 2C family protein
			Cre02.g084300	#N/A	30785994	Cre02.g084300.t1.2	Cre02.g084300.t1.2	PF01209	PTHR10108,PTHR10108:SF236	KOG1540	2.1.1.-	K06127	GO:0008168	AT1G23360.1	MENG	S-adenosyl-L-methionine-dependent methyltransferases superfamily protein
			Cre02.g084350	#N/A	30784841	Cre02.g084350.t1.2	Cre02.g084350.t1.2	PF01169	PTHR12608	KOG2881			GO:0016020	AT1G64150.1		Uncharacterized protein family (UPF0016)
			Cre02.g084400	#N/A	30785711	Cre02.g084400.t1.2	Cre02.g084400.t1.2	PF03171	PTHR10869	KOG1591			GO:0016491	AT3G06300.1	AT-P4H-2	P4H isoform 2
			Cre02.g084450	#N/A	30785932	Cre02.g084450.t1.2	Cre02.g084450.t1.2	PF03171	PTHR10869				GO:0016491	AT5G18900.1		2-oxoglutarate (2OG) and Fe(II)-dependent oxygenase superfamily protein
			Cre02.g084500	#N/A	30785156	Cre02.g084500.t1.1	Cre02.g084500.t1.1	PF01753	PTHR13244				GO:0008270
			Cre02.g084550	#N/A	30785148	Cre02.g084550.t1.2	Cre02.g084550.t1.2	PF00583	PTHR23091:SF34,PTHR23091				GO:0008080,GO:0008152	AT4G28030.1		Acyl-CoA N-acyltransferases (NAT) superfamily protein
			Cre02.g084600	#N/A	30786042	Cre02.g084600.t1.2	Cre02.g084600.t1.2
			Cre02.g084650	#N/A	30786222	Cre02.g084650.t1.2	Cre02.g084650.t1.2	PF03810	PTHR10997:SF7,PTHR10997	KOG1993			GO:0006886,GO:0008565	AT3G08960.1		ARM repeat superfamily protein
			Cre02.g084700	#N/A	30785472	Cre02.g084700.t1.2	Cre02.g084700.t1.2
			Cre02.g084750	#N/A	30784876	Cre02.g084750.t1.1	Cre02.g084750.t1.1	PF00076	PTHR24622,PTHR24622:SF229	KOG0105			GO:0003676	AT3G13224.2		RNA-binding (RRM/RBD/RNP motifs) family protein
			Cre02.g084750	#N/A	30784877	Cre02.g084750.t2.1	Cre02.g084750.t2.1	PF00076	PTHR24622,PTHR24622:SF229	KOG0105			GO:0003676	AT3G13224.2		RNA-binding (RRM/RBD/RNP motifs) family protein
			Cre02.g084800	#N/A	30785864	Cre02.g084800.t1.2	Cre02.g084800.t1.2	PF04406	PTHR10848	KOG2795		K10878	GO:0003677,GO:0003824,GO:0005524,GO:0005694,GO:0006259	AT5G02820.1	BIN5,RHL2	Spo11/DNA topoisomerase VI, subunit A protein
			Cre02.g084850	#N/A	30785795	Cre02.g084850.t1.1	Cre02.g084850.t1.1
			Cre02.g084873	#N/A	30785044	Cre02.g084873.t1.2	Cre02.g084873.t1.2
			Cre02.g084900	#N/A	30786010	Cre02.g084900.t1.2	Cre02.g084900.t1.2	PF00515	PTHR22904,PTHR22904:SF166				GO:0005515	AT1G56440.1		Tetratricopeptide repeat (TPR)-like superfamily protein
			Cre02.g084950	#N/A	30785412	Cre02.g084950.t1.2	Cre02.g084950.t1.2	PF00625	PTHR23117,PTHR23117:SF5	KOG0707	2.7.4.8	K00942	GO:0005515	AT3G06200.1		P-loop containing nucleoside triphosphate hydrolases superfamily protein
			Cre02.g085000	#N/A	30785050	Cre02.g085000.t1.1	Cre02.g085000.t1.1	PF00400	PTHR22847:SF135,PTHR22847					AT2G33340.1	MAC3B	MOS4-associated complex 3B
			Cre02.g085050	#N/A	30785833	Cre02.g085050.t1.2	Cre02.g085050.t1.2	PF00400,PF00097	PTHR22847:SF121,PTHR22847	KOG0266				AT2G32950.1	ATCOP1,COP1,DET340,EMB168,FUS1	Transducin/WD40 repeat-like superfamily protein
			Cre02.g085100	#N/A	30784835	Cre02.g085100.t1.2	Cre02.g085100.t1.2	PF00211	PTHR11920:SF112,PTHR11920		4.6.1.2	K12323	GO:0009190,GO:0016849,GO:0035556
			Cre02.g085150	#N/A	30786461	Cre02.g085150.t1.1	Cre02.g085150.t1.1	PF03110					GO:0003677,GO:0005634	AT2G47070.1	SPL1	squamosa promoter binding protein-like 1
			Cre02.g085150	#N/A	30786462	Cre02.g085150.t2.1	Cre02.g085150.t2.1	PF03110					GO:0003677,GO:0005634	AT5G18830.3	ATSPL7,SPL7	squamosa promoter binding protein-like 7
			Cre02.g085200	#N/A	30786459	Cre02.g085200.t1.1	Cre02.g085200.t1.1	PF01585	PTHR13948,PTHR13948:SF19				GO:0003676,GO:0005622	AT5G08535.1		D111/G-patch domain-containing protein
			Cre02.g085257	#N/A	30785561	Cre02.g085257.t1.2	Cre02.g085257.t1.2	PF01036					GO:0005216,GO:0006811,GO:0016020
			Cre02.g085279	#N/A	30786260	Cre02.g085279.t1.1	Cre02.g085279.t1.1
			Cre02.g085300	#N/A	30785290	Cre02.g085300.t1.2	Cre02.g085300.t1.2
			Cre02.g085326	#N/A	30785178	Cre02.g085326.t1.1	Cre02.g085326.t1.1
			Cre02.g085350	#N/A	30785285	Cre02.g085350.t1.1	Cre02.g085350.t1.1
			Cre02.g085350	#N/A	30785286	Cre02.g085350.t2.1	Cre02.g085350.t2.1
			Cre02.g085400	#N/A	30786113	Cre02.g085400.t1.1	Cre02.g085400.t1.1
			Cre02.g085450	#N/A	30785718	Cre02.g085450.t1.2	Cre02.g085450.t1.2	PF01218	PTHR10755	KOG1518	1.3.3.3	K00228	GO:0004109,GO:0006779,GO:0055114	AT1G03475.1	ATCPO-I,HEMF1,LIN2	Coproporphyrinogen III oxidase
			Cre02.g085500	#N/A	30784995	Cre02.g085500.t1.1	Cre02.g085500.t1.1	PF07282
			Cre02.g085550	#N/A	30785526	Cre02.g085550.t1.2	Cre02.g085550.t1.2
			Cre02.g085600	#N/A	30786503	Cre02.g085600.t1.2	Cre02.g085600.t1.2	PF03959	PTHR22778	KOG2551				AT5G65400.1		alpha/beta-Hydrolases superfamily protein
			Cre02.g085650	#N/A	30786111	Cre02.g085650.t1.1	Cre02.g085650.t1.1	PF01026	PTHR10060	KOG3020	3.1.21.-	K03424	GO:0016888	AT3G52390.1		TatD related DNase
			Cre02.g085701	#N/A	30785514	Cre02.g085701.t1.1	Cre02.g085701.t1.1	PF00097	PTHR22766,PTHR22766:SF19					AT2G39100.1		RING/U-box superfamily protein
			Cre02.g085750	#N/A	30785881	Cre02.g085750.t1.1	Cre02.g085750.t1.1	PF01547	PTHR11017				GO:0005215,GO:0006810
			Cre02.g085800	#N/A	30785312	Cre02.g085800.t1.1	Cre02.g085800.t1.1
			Cre02.g085850	#N/A	30784923	Cre02.g085850.t1.1	Cre02.g085850.t1.1	PF00884	PTHR10342:SF2,PTHR10342	KOG3867			GO:0008152,GO:0008484
			Cre02.g085900	#N/A	30785748	Cre02.g085900.t1.2	Cre02.g085900.t1.2	PF00459	PTHR20854:SF10,PTHR20854	KOG2951			GO:0004437	AT1G31190.1	IMPL1	myo-inositol monophosphatase like 1
			Cre02.g085950	#N/A	30785369	Cre02.g085950.t1.2	Cre02.g085950.t1.2	PF11523						AT5G62440.1		Protein of unknown function (DUF3223)
			Cre02.g086000	#N/A	30786139	Cre02.g086000.t1.1	Cre02.g086000.t1.1	PF00884	PTHR10342:SF2,PTHR10342				GO:0008152,GO:0008484
			Cre02.g086050	#N/A	30786164	Cre02.g086050.t1.1	Cre02.g086050.t1.1	PF01416	PTHR11142	KOG2554			GO:0001522,GO:0003723,GO:0009451,GO:0009982	AT1G34150.1		Pseudouridine synthase family protein
			Cre02.g086076	#N/A	30785905	Cre02.g086076.t1.2	Cre02.g086076.t1.2							AT5G23200.1
			Cre02.g086076	#N/A	30785906	Cre02.g086076.t2.1	Cre02.g086076.t2.1							AT5G23200.1
			Cre02.g086100	#N/A	30784943	Cre02.g086100.t1.2	Cre02.g086100.t1.2							AT1G49975.1
			Cre02.g086150	#N/A	30785698	Cre02.g086150.t1.2	Cre02.g086150.t1.2
			Cre02.g086200	#N/A	30785669	Cre02.g086200.t1.2	Cre02.g086200.t1.2
			Cre02.g086250	#N/A	30785601	Cre02.g086250.t1.1	Cre02.g086250.t1.1
			Cre02.g086300	#N/A	30786306	Cre02.g086300.t1.1	Cre02.g086300.t1.1
			Cre02.g086300	#N/A	30786307	Cre02.g086300.t2.1	Cre02.g086300.t2.1
			Cre02.g086326	#N/A	30786466	Cre02.g086326.t1.1	Cre02.g086326.t1.1
			Cre02.g086350	#N/A	30785279	Cre02.g086350.t1.1	Cre02.g086350.t1.1
			Cre02.g086400	#N/A	30786200	Cre02.g086400.t1.2	Cre02.g086400.t1.2
			Cre02.g086428	#N/A	30785038	Cre02.g086428.t1.1	Cre02.g086428.t1.1
			Cre02.g086456	#N/A	30786034	Cre02.g086456.t1.2	Cre02.g086456.t1.2
			Cre02.g086456	#N/A	30786036	Cre02.g086456.t2.1	Cre02.g086456.t2.1
			Cre02.g086456	#N/A	30786035	Cre02.g086456.t3.1	Cre02.g086456.t3.1
			Cre02.g086500	#N/A	30784820	Cre02.g086500.t1.2	Cre02.g086500.t1.2	PF00300	PTHR23029	KOG4754				AT1G09935.1		Phosphoglycerate mutase family protein
			Cre02.g086550	#N/A	30785530	Cre02.g086550.t1.1	Cre02.g086550.t1.1	PF04055					GO:0003824,GO:0051536	AT1G60230.1		Radical SAM superfamily protein
			Cre02.g086600	#N/A	30786398	Cre02.g086600.t1.2	Cre02.g086600.t1.2	PF07366
			Cre02.g086650	#N/A	30785243	Cre02.g086650.t1.2	Cre02.g086650.t1.2	PF02463,PF06470	PTHR18937,PTHR18937:SF9	KOG0933		K06674	GO:0005524,GO:0005694,GO:0005515,GO:0051276	AT5G62410.1	ATCAP-E1,ATSMC4,SMC2,TTN3	structural maintenance of chromosomes 2
			Cre02.g086700	#N/A	30785991	Cre02.g086700.t1.2	Cre02.g086700.t1.2	PF10191	PTHR21443	KOG4182				AT5G51430.1	EYE	conserved oligomeric Golgi complex component-related / COG complex component-related
			Cre02.g086750	#N/A	30786081	Cre02.g086750.t1.1	Cre02.g086750.t1.1	PF03876					GO:0003899,GO:0006351	AT1G75670.1		DNA-directed RNA polymerases
			Cre02.g086750	#N/A	30786082	Cre02.g086750.t2.1	Cre02.g086750.t2.1	PF03876					GO:0003899,GO:0006351	AT1G75670.1		DNA-directed RNA polymerases
			Cre02.g086800	#N/A	30784985	Cre02.g086800.t1.2	Cre02.g086800.t1.2
			Cre02.g086850	#N/A	30786000	Cre02.g086850.t1.1	Cre02.g086850.t1.1
			Cre02.g086887	#N/A	30784868	Cre02.g086887.t1.1	Cre02.g086887.t1.1	PF12110,PF04096	PTHR12347,PTHR12347:SF13			K14297	GO:0005643,GO:0006810	AT1G80680.1	MOS3,NUP96,PRE,SAR3	SUPPRESSOR OF AUXIN RESISTANCE 3
			Cre02.g086887	#N/A	30784869	Cre02.g086887.t2.1	Cre02.g086887.t2.1	PF04096	PTHR12347,PTHR12347:SF13			K14297	GO:0005643,GO:0006810	AT1G10390.1		Nucleoporin autopeptidase
			Cre02.g086887	#N/A	30784870	Cre02.g086887.t3.1	Cre02.g086887.t3.1	PF12110						AT1G80680.1	MOS3,NUP96,PRE,SAR3	SUPPRESSOR OF AUXIN RESISTANCE 3
			Cre02.g087000	#N/A	30785821	Cre02.g087000.t1.1	Cre02.g087000.t1.1	PF01753					GO:0008270
			Cre02.g087050	#N/A	30785543	Cre02.g087050.t1.1	Cre02.g087050.t1.1
			Cre02.g087100	#N/A	30786470	Cre02.g087100.t1.2	Cre02.g087100.t1.2
			Cre02.g087150	#N/A	30785329	Cre02.g087150.t1.2	Cre02.g087150.t1.2
			Cre02.g087200	#N/A	30785024	Cre02.g087200.t1.1	Cre02.g087200.t1.1			KOG4462				AT2G41960.1
			Cre02.g087250	#N/A	30786060	Cre02.g087250.t1.1	Cre02.g087250.t1.1
			Cre02.g087300	#N/A	30785990	Cre02.g087300.t1.1	Cre02.g087300.t1.1	PF02826	PTHR10996:SF3,PTHR10996	KOG0069			GO:0016616,GO:0048037	AT1G12550.1		D-isomer specific 2-hydroxyacid dehydrogenase family protein
			Cre02.g087324	#N/A	30785487	Cre02.g087324.t1.1	Cre02.g087324.t1.1
			Cre02.g087350	#N/A	30786454	Cre02.g087350.t1.1	Cre02.g087350.t1.1
			Cre02.g087400	#N/A	30786436	Cre02.g087400.t1.2	Cre02.g087400.t1.2
			Cre02.g087450	#N/A	30785237	Cre02.g087450.t1.2	Cre02.g087450.t1.2	PF02582	PTHR16255	KOG2861				AT1G69380.1		Protein of unknown function (DUF155)
			Cre02.g087500	#N/A	30785075	Cre02.g087500.t1.1	Cre02.g087500.t1.1
			Cre02.g087551	#N/A	30786045	Cre02.g087551.t1.1	Cre02.g087551.t1.1	PF07928,PF10475	PTHR12965				GO:0042147	AT4G19490.1	ATVPS54,VPS54	VPS54
			Cre02.g087600	#N/A	30785983	Cre02.g087600.t1.1	Cre02.g087600.t1.1	PF00176,PF00271	PTHR10799,PTHR10799:SF92		3.6.4.12	K14439	GO:0003677,GO:0005524,GO:0003676,GO:0004386	AT2G02090.1	CHA19,CHR19,ETL1	SNF2 domain-containing protein / helicase domain-containing protein
			Cre02.g087633	#N/A	30784879	Cre02.g087633.t1.1	Cre02.g087633.t1.1
			Cre02.g087666	#N/A	30785822	Cre02.g087666.t1.1	Cre02.g087666.t1.1	PF00014	PTHR10083:SF39,PTHR10083				GO:0004867
			Cre02.g087700	#N/A	30785120	Cre02.g087700.t1.2	Cre02.g087700.t1.2	PF00141			1.11.1.11	K00434	GO:0004601,GO:0006979,GO:0020037,GO:0055114	AT4G08390.1	SAPX	stromal ascorbate peroxidase
			Cre02.g087750	#N/A	30785802	Cre02.g087750.t1.2	Cre02.g087750.t1.2	PF00069	PTHR23257	KOG0192			GO:0004672,GO:0005524,GO:0006468	AT2G35050.1		Protein kinase superfamily protein with octicosapeptide/Phox/Bem1p domain
			Cre02.g087800	#N/A	30785308	Cre02.g087800.t1.1	Cre02.g087800.t1.1	PF00069	PTHR23257	KOG0192			GO:0004672,GO:0005524,GO:0006468	AT3G63260.1	ATMRK1	Protein kinase superfamily protein
			Cre02.g087850	#N/A	30784997	Cre02.g087850.t1.1	Cre02.g087850.t1.1	PF00069	PTHR23257	KOG0192			GO:0004672,GO:0005524,GO:0006468	AT5G38210.1		Protein kinase family protein
			Cre02.g087900	#N/A	30785603	Cre02.g087900.t1.1	Cre02.g087900.t1.1	PF00069	PTHR23257	KOG0192			GO:0004672,GO:0005524,GO:0006468	AT1G79570.1		Protein kinase superfamily protein with octicosapeptide/Phox/Bem1p domain
			Cre02.g087950	#N/A	30785739	Cre02.g087950.t1.2	Cre02.g087950.t1.2	PF01588,PF09334	PTHR11946,PTHR11946:SF20	KOG1247	6.1.1.10	K01874	GO:0000049,GO:0000166,GO:0004812,GO:0005524,GO:0005737,GO:0006412,GO:0006418	AT4G13780.1		methionine--tRNA ligase, putative / methionyl-tRNA synthetase, putative / MetRS, putative
			Cre02.g088000	#N/A	30785293	Cre02.g088000.t1.2	Cre02.g088000.t1.2	PF01145	PTHR23222	KOG3090			GO:0016020	AT4G28510.1	ATPHB1,PHB1	prohibitin 1
			Cre02.g088050	#N/A	30786281	Cre02.g088050.t1.2	Cre02.g088050.t1.2	PF01876	PTHR13031		3.1.26.5	K03539	GO:0004540,GO:0008033	AT5G59980.2		Polymerase/histidinol phosphatase-like
			Cre02.g088100	#N/A	30785180	Cre02.g088100.t1.2	Cre02.g088100.t1.2
			Cre02.g088151	#N/A	30785938	Cre02.g088151.t1.1	Cre02.g088151.t1.1
			Cre02.g088200	#N/A	30786096	Cre02.g088200.t1.2	Cre02.g088200.t1.2	PF00085	PTHR18929,PTHR18929:SF32	KOG0190	5.3.4.1	K09580	GO:0045454	AT5G60640.1	ATPDI2,ATPDIL1-4,PDI2,PDIL1-4	PDI-like 1-4
			Cre02.g088250	#N/A	30786117	Cre02.g088250.t1.2	Cre02.g088250.t1.2	PF00698	PTHR10982	KOG2926				AT2G30200.1		catalytics;transferases;[acyl-carrier-protein] S-malonyltransferases;binding
			Cre02.g088300	#N/A	30785564	Cre02.g088300.t1.1	Cre02.g088300.t1.1	PF00294	PTHR10584:SF21,PTHR10584
			Cre02.g088350	#N/A	30784932	Cre02.g088350.t1.1	Cre02.g088350.t1.1	PF09335						AT2G02370.1		SNARE associated Golgi protein family
			Cre02.g088400	#N/A	30785518	Cre02.g088400.t1.2	Cre02.g088400.t1.2	PF00089	PTHR22939:SF21,PTHR22939	KOG1320			GO:0004252,GO:0006508	AT3G27925.1	Deg1,DEGP1	DegP protease 1
			Cre02.g088400	#N/A	30785519	Cre02.g088400.t2.1	Cre02.g088400.t2.1	PF00089	PTHR22939:SF21,PTHR22939	KOG1320			GO:0004252,GO:0006508	AT3G27925.1	Deg1,DEGP1	DegP protease 1
			Cre02.g088450	#N/A	30785848	Cre02.g088450.t1.1	Cre02.g088450.t1.1	PF02194,PF00787,PF08628	PTHR22999	KOG2527			GO:0005515,GO:0007154,GO:0035091	AT1G15240.2		Phox-associated domain;Phox-like;Sorting nexin, C-terminal
			Cre02.g088500	#N/A	30784871	Cre02.g088500.t1.1	Cre02.g088500.t1.1	PF07366						AT1G71480.1		Nuclear transport factor 2 (NTF2) family protein
			Cre02.g088551	#N/A	30786146	Cre02.g088551.t1.1	Cre02.g088551.t1.1
			Cre02.g088600	#N/A	30784994	Cre02.g088600.t1.2	Cre02.g088600.t1.2	PF00285,PF00549	PTHR26330	KOG1254	2.3.3.8	K01648	GO:0044262,GO:0046912,GO:0003824,GO:0008152	AT3G06650.1	ACLB-1	ATP-citrate lyase B-1
			Cre02.g088650	#N/A	30784800	Cre02.g088650.t1.2	Cre02.g088650.t1.2
			Cre02.g088651	#N/A	30785749	Cre02.g088651.t1.2	Cre02.g088651.t1.2
			Cre02.g088700	#N/A	30785219	Cre02.g088700.t1.2	Cre02.g088700.t1.2
			Cre02.g088750	#N/A	30786209	Cre02.g088750.t1.2	Cre02.g088750.t1.2	PF02260,PF02259,PF00454	PTHR11139,PTHR11139:SF1	KOG0889		K08874	GO:0005515,GO:0016773	AT4G36080.2		phosphotransferases, alcohol group as acceptor;binding;inositol or phosphatidylinositol kinases
			Cre02.g088800	#N/A	30786179	Cre02.g088800.t1.2	Cre02.g088800.t1.2	PF00076	PTHR24012,PTHR24012:SF28				GO:0003676	AT3G04500.1		RNA-binding (RRM/RBD/RNP motifs) family protein
			Cre02.g088850	#N/A	30785985	Cre02.g088850.t1.2	Cre02.g088850.t1.2	PF00885	PTHR21058	KOG3243	2.5.1.78	K00794	GO:0009231,GO:0009349	AT2G44050.1	COS1	6,7-dimethyl-8-ribityllumazine synthase / DMRL synthase / lumazine synthase / riboflavin synthase
			Cre02.g088900	#N/A	30785043	Cre02.g088900.t1.2	Cre02.g088900.t1.2	PF00687	PTHR23105,PTHR23105:SF5				GO:0003723,GO:0003735,GO:0006412,GO:0015934	AT3G63490.1		Ribosomal protein L1p/L10e family
			Cre02.g088950	#N/A	30785828	Cre02.g088950.t1.2	Cre02.g088950.t1.2
			Cre02.g089000	#N/A	30785517	Cre02.g089000.t1.1	Cre02.g089000.t1.1
			Cre02.g089050	#N/A	30784927	Cre02.g089050.t1.1	Cre02.g089050.t1.1
			Cre02.g089100	#N/A	30785516	Cre02.g089100.t1.2	Cre02.g089100.t1.2	PF01217,PF00928	PTHR10121	KOG2635			GO:0005515,GO:0006886,GO:0016192,GO:0030131	AT5G05010.1		clathrin adaptor complexes medium subunit family protein
			Cre02.g089150	#N/A	30786340	Cre02.g089150.t1.1	Cre02.g089150.t1.1	PF00569,PF04433,PF00249	PTHR12374,PTHR12374:SF1	KOG0457		K11314	GO:0008270,GO:0005515	AT3G07740.1	ADA2A,ATADA2A,HAC10,HXA02,HXA2	homolog of yeast ADA2 2A
			Cre02.g089200	#N/A	30785287	Cre02.g089200.t1.2	Cre02.g089200.t1.2	PF00856,PF02182	PTHR22884,PTHR22884:SF114	KOG1082			GO:0005515,GO:0042393	AT2G22740.1	SDG23,SUVH6	SU(VAR)3-9 homolog 6
			Cre02.g089237	#N/A	30786258	Cre02.g089237.t1.1	Cre02.g089237.t1.1	PF02207	PTHR21497		6.3.2.19	K11978	GO:0004842,GO:0008270	AT5G02310.1	PRT6	proteolysis 6
			Cre02.g089274	#N/A	30785097	Cre02.g089274.t1.1	Cre02.g089274.t1.1	PF00023,PF00415	PTHR22870,PTHR22870:SF6				GO:0005515	AT3G03790.2		ankyrin repeat family protein / regulator of chromosome condensation (RCC1) family protein
			Cre02.g089311	#N/A	30785862	Cre02.g089311.t1.1	Cre02.g089311.t1.1	PF00328		KOG3720			GO:0003993
			Cre02.g089350	#N/A	30785125	Cre02.g089350.t1.1	Cre02.g089350.t1.1
			Cre02.g089400	#N/A	30785836	Cre02.g089400.t1.1	Cre02.g089400.t1.1
			Cre02.g089450	#N/A	30786370	Cre02.g089450.t1.2	Cre02.g089450.t1.2
			Cre02.g089500	#N/A	30785271	Cre02.g089500.t1.2	Cre02.g089500.t1.2
			Cre02.g089550	#N/A	30784998	Cre02.g089550.t1.2	Cre02.g089550.t1.2
			Cre02.g089550	#N/A	30784999	Cre02.g089550.t2.1	Cre02.g089550.t2.1
			Cre02.g089600	#N/A	30785717	Cre02.g089600.t1.1	Cre02.g089600.t1.1
			Cre02.g089608	#N/A	30785132	Cre02.g089608.t1.2	Cre02.g089608.t1.2	PF06733	PTHR11472:SF4,PTHR11472	KOG1132		K11136	GO:0003677,GO:0004003,GO:0005524	AT1G79950.1		RAD3-like DNA-binding helicase protein
			Cre02.g089650	#N/A	30785885	Cre02.g089650.t1.1	Cre02.g089650.t1.1			KOG3454
			Cre02.g089700	#N/A	30785228	Cre02.g089700.t1.2	Cre02.g089700.t1.2
			Cre02.g089750	#N/A	30786192	Cre02.g089750.t1.2	Cre02.g089750.t1.2
			Cre02.g089800	#N/A	30785611	Cre02.g089800.t1.1	Cre02.g089800.t1.1
			Cre02.g089850	#N/A	30786190	Cre02.g089850.t1.2	Cre02.g089850.t1.2	PF08512						AT3G28730.1	ATHMG,HMG,NFD,SSRP1	high mobility group
			Cre02.g089850	#N/A	30786191	Cre02.g089850.t2.1	Cre02.g089850.t2.1	PF08512						AT3G28730.1	ATHMG,HMG,NFD,SSRP1	high mobility group
			Cre02.g089900	#N/A	30785215	Cre02.g089900.t1.2	Cre02.g089900.t1.2	PF04144	PTHR10687,PTHR10687:SF2	KOG3088			GO:0015031,GO:0016021	AT1G61250.1	SC3	secretory carrier 3
			Cre02.g089950	#N/A	30785958	Cre02.g089950.t1.2	Cre02.g089950.t1.2
			Cre02.g090000	#N/A	30785210	Cre02.g090000.t1.1	Cre02.g090000.t1.1	PF00211	PTHR11017				GO:0009190,GO:0016849,GO:0035556
			Cre02.g090050	#N/A	30785361	Cre02.g090050.t1.1	Cre02.g090050.t1.1
			Cre02.g090100	#N/A	30786343	Cre02.g090100.t1.2	Cre02.g090100.t1.2	PF01529	PTHR22883				GO:0008270	AT3G04970.1		DHHC-type zinc finger family protein
			Cre02.g090150	#N/A	30785624	Cre02.g090150.t1.2	Cre02.g090150.t1.2	PF02569	PTHR21299,PTHR21299:SF1		6.3.2.1	K01918	GO:0004592,GO:0015940	AT5G48840.1	ATPTS,PANC,PTS	homolog of bacterial PANC
			Cre02.g090200	#N/A	30785713	Cre02.g090200.t1.1	Cre02.g090200.t1.1
			Cre02.g090276	#N/A	30784990	Cre02.g090276.t1.1	Cre02.g090276.t1.1	PF04857	PTHR15092,PTHR15092:SF17				GO:0005634	AT1G55870.1	AHG2,ATPARN	Polynucleotidyl transferase, ribonuclease H-like superfamily protein
			Cre02.g090350	#N/A	30785785	Cre02.g090350.t1.1	Cre02.g090350.t1.1
			Cre02.g090400	#N/A	30784819	Cre02.g090400.t1.2	Cre02.g090400.t1.2
			Cre02.g090451	#N/A	30786078	Cre02.g090451.t1.1	Cre02.g090451.t1.1
			Cre02.g090500	#N/A	30786041	Cre02.g090500.t1.1	Cre02.g090500.t1.1	PF00271,PF00270	PTHR24772,PTHR24772:SF101	KOG0328			GO:0003676,GO:0004386,GO:0005524,GO:0008026	AT4G00660.1	ATRH8,RH8	RNAhelicase-like 8
			Cre02.g090526	#N/A	30786458	Cre02.g090526.t1.1	Cre02.g090526.t1.1
			Cre02.g090550	#N/A	30784885	Cre02.g090550.t1.1	Cre02.g090550.t1.1	PF00884	PTHR10342:SF2,PTHR10342	KOG3867			GO:0008152,GO:0008484
			Cre02.g090600	#N/A	30786296	Cre02.g090600.t1.2	Cre02.g090600.t1.2	PF00400	PTHR22652					AT4G30840.1		Transducin/WD40 repeat-like superfamily protein
			Cre02.g090650	#N/A	30785521	Cre02.g090650.t1.1	Cre02.g090650.t1.1	PF03908	PTHR12825					AT3G24315.1	AtSec20	Sec20 family protein
			Cre02.g090689	#N/A	30785173	Cre02.g090689.t1.2	Cre02.g090689.t1.2
			Cre02.g090700	#N/A	30785892	Cre02.g090700.t1.1	Cre02.g090700.t1.1	PF07714	PTHR23257:SF167,PTHR23257	KOG0192			GO:0004672,GO:0006468	AT1G18160.1		Protein kinase superfamily protein
			Cre02.g090750	#N/A	30785927	Cre02.g090750.t1.2	Cre02.g090750.t1.2	PF08574
			Cre02.g090850	#N/A	30785159	Cre02.g090850.t1.1	Cre02.g090850.t1.1	PF02861,PF00004,PF07724,PF10431	PTHR11638:SF18,PTHR11638	KOG1051		K03695	GO:0019538,GO:0005524	AT5G15450.1	APG6,CLPB-P,CLPB3	casein lytic proteinase B3
			Cre02.g090900	#N/A	30785593	Cre02.g090900.t1.1	Cre02.g090900.t1.1	PF00153	PTHR24089:SF139,PTHR24089	KOG0758				AT1G07030.1		Mitochondrial substrate carrier family protein
			Cre02.g090900	#N/A	30785594	Cre02.g090900.t2.1	Cre02.g090900.t2.1	PF00153	PTHR24089:SF139,PTHR24089	KOG0760				AT5G15640.1		Mitochondrial substrate carrier family protein
			Cre02.g090950	#N/A	30786450	Cre02.g090950.t1.1	Cre02.g090950.t1.1		PTHR13317:SF6,PTHR13317
			Cre02.g091000	#N/A	30785569	Cre02.g091000.t1.2	Cre02.g091000.t1.2	PF05346	PTHR13317:SF6,PTHR13317	KOG0487				AT1G67960.1
			Cre02.g091050	#N/A	30786314	Cre02.g091050.t1.2	Cre02.g091050.t1.2	PF00490	PTHR11458	KOG2794	4.2.1.24	K01698	GO:0004655,GO:0033014,GO:0046872	AT1G69740.1	HEMB1	Aldolase superfamily protein
			Cre02.g091100	#N/A	30785346	Cre02.g091100.t1.2	Cre02.g091100.t1.2	PF00827	PTHR11847	KOG1678		K02877	GO:0003735,GO:0005622,GO:0005840,GO:0006412	AT4G16720.1		Ribosomal protein L23/L15e family protein
			Cre02.g091150	#N/A	30786099	Cre02.g091150.t1.1	Cre02.g091150.t1.1	PF00626,PF04810,PF04811,PF08033,PF04815	PTHR13803	KOG1985		K14007	GO:0006886,GO:0006888,GO:0008270,GO:0030127	AT3G07100.1	ERMO2,SEC24A	Sec23/Sec24 protein transport family protein
			Cre02.g091193	#N/A	30785288	Cre02.g091193.t1.2	Cre02.g091193.t1.2							AT3G17668.1	ENA	DnaJ/Hsp40 cysteine-rich domain superfamily protein
			Cre02.g091200	#N/A	30785175	Cre02.g091200.t1.1	Cre02.g091200.t1.1	PF04209	PTHR11056	KOG1417			GO:0004411,GO:0006559,GO:0006570,GO:0055114	AT5G54080.1	HGO	homogentisate 1,2-dioxygenase
			Cre02.g091226	#N/A	30785965	Cre02.g091226.t1.1	Cre02.g091226.t1.1
			Cre02.g091250	#N/A	30784963	Cre02.g091250.t1.2	Cre02.g091250.t1.2
			Cre02.g091300	#N/A	30786412	Cre02.g091300.t1.1	Cre02.g091300.t1.1
			Cre02.g091350	#N/A	30785004	Cre02.g091350.t1.1	Cre02.g091350.t1.1
			Cre02.g091350	#N/A	30785005	Cre02.g091350.t2.1	Cre02.g091350.t2.1
			Cre02.g091400	#N/A	30785781	Cre02.g091400.t1.1	Cre02.g091400.t1.1	PF00004,PF07724	PTHR11638:SF60,PTHR11638				GO:0005524	AT2G25140.1	CLPB-M,CLPB4,HSP98.7	casein lytic proteinase B4
			Cre02.g091450	#N/A	30784813	Cre02.g091450.t1.1	Cre02.g091450.t1.1
			Cre02.g091500	#N/A	30785558	Cre02.g091500.t1.1	Cre02.g091500.t1.1
			Cre02.g091550	#N/A	30786474	Cre02.g091550.t1.2	Cre02.g091550.t1.2	PF08536						AT2G02740.2	ATWHY3,PTAC11,WHY3	ssDNA-binding transcriptional regulator
			Cre02.g091567	#N/A	30785524	Cre02.g091567.t1.1	Cre02.g091567.t1.1
			Cre02.g091567	#N/A	30785525	Cre02.g091567.t2.1	Cre02.g091567.t2.1
			Cre02.g091600	#N/A	30786152	Cre02.g091600.t1.1	Cre02.g091600.t1.1
			Cre02.g091650	#N/A	30785195	Cre02.g091650.t1.1	Cre02.g091650.t1.1
			Cre02.g091700	#N/A	30785960	Cre02.g091700.t1.2	Cre02.g091700.t1.2	PF06565	PTHR12086	KOG0043
			Cre02.g091750	#N/A	30784887	Cre02.g091750.t1.2	Cre02.g091750.t1.2	PF00686					GO:0003824,GO:0005975	AT5G26570.1	ATGWD3,OK1,PWD	catalytics;carbohydrate kinases;phosphoglucan, water dikinases
			Cre02.g091750	#N/A	30784888	Cre02.g091750.t2.1	Cre02.g091750.t2.1	PF00686					GO:0003824,GO:0005975	AT5G26570.1	ATGWD3,OK1,PWD	catalytics;carbohydrate kinases;phosphoglucan, water dikinases
			Cre02.g091750	#N/A	30784889	Cre02.g091750.t3.1	Cre02.g091750.t3.1	PF00686					GO:0003824,GO:0005975	AT5G26570.2	ATGWD3,OK1,PWD	catalytics;carbohydrate kinases;phosphoglucan, water dikinases
			Cre02.g091850	#N/A	30785886	Cre02.g091850.t1.2	Cre02.g091850.t1.2	PF00378	PTHR11941	KOG1679	4.2.1.18	K05607	GO:0003824,GO:0008152	AT4G16800.1		ATP-dependent caseinolytic (Clp) protease/crotonase family protein
			Cre02.g091900	#N/A	30784953	Cre02.g091900.t1.1	Cre02.g091900.t1.1			KOG1003
			Cre02.g091950	#N/A	30786018	Cre02.g091950.t1.1	Cre02.g091950.t1.1	PF00211	PTHR11920				GO:0009190,GO:0016849,GO:0035556
			Cre02.g092000	#N/A	30786241	Cre02.g092000.t1.1	Cre02.g092000.t1.1	PF00089	PTHR22939,PTHR22939:SF1	KOG1320			GO:0004252,GO:0006508	AT5G36950.1	DegP10	DegP protease 10
			Cre02.g092050	#N/A	30785738	Cre02.g092050.t1.1	Cre02.g092050.t1.1	PF00153	PTHR24089:SF94,PTHR24089	KOG0752				AT5G15640.1		Mitochondrial substrate carrier family protein
			Cre02.g092076	#N/A	30785197	Cre02.g092076.t1.1	Cre02.g092076.t1.1
			Cre02.g092100	#N/A	30784928	Cre02.g092100.t1.2	Cre02.g092100.t1.2
			Cre02.g092150	#N/A	30785716	Cre02.g092150.t1.2	Cre02.g092150.t1.2	PF00560	PTHR23155:SF252,PTHR23155	KOG0617			GO:0005515	AT1G35710.1		Protein kinase family protein with leucine-rich repeat domain
			Cre02.g092200	#N/A	30785236	Cre02.g092200.t1.2	Cre02.g092200.t1.2
			Cre02.g092250	#N/A	30786424	Cre02.g092250.t1.2	Cre02.g092250.t1.2	PF07719,PF00254	PTHR10516	KOG0543			GO:0006457	AT3G21640.1	ATFKBP42,FKBP42,TWD1,UCU2	FKBP-type peptidyl-prolyl cis-trans isomerase family protein
			Cre02.g092284	#N/A	30786316	Cre02.g092284.t1.1	Cre02.g092284.t1.1	PF07847	PTHR22966	KOG4281	1.13.11.19	K10712	GO:0047800,GO:0055114	AT2G42670.1		Protein of unknown function (DUF1637)
			Cre02.g092284	#N/A	30786317	Cre02.g092284.t2.1	Cre02.g092284.t2.1	PF07847	PTHR22966	KOG4281	1.13.11.19	K10712	GO:0047800,GO:0055114	AT5G39890.1		Protein of unknown function (DUF1637)
			Cre02.g092350	#N/A	30784988	Cre02.g092350.t1.2	Cre02.g092350.t1.2	PF00067	PTHR24286,PTHR24286:SF13	KOG0684	1.14.13.70	K05917	GO:0005506,GO:0009055,GO:0016705,GO:0020037	AT1G11680.1	CYP51,CYP51A2,CYP51G1,EMB1738	CYTOCHROME P450 51G1
			Cre02.g092400	#N/A	30786123	Cre02.g092400.t1.1	Cre02.g092400.t1.1	PF02136	PTHR10693	KOG0116			GO:0005622,GO:0006810	AT5G48650.1		Nuclear transport factor 2 (NTF2) family protein with RNA binding (RRM-RBD-RNP motifs) domain
			Cre02.g092451	#N/A	30785576	Cre02.g092451.t1.1	Cre02.g092451.t1.1
			Cre02.g092500	#N/A	30785207	Cre02.g092500.t1.1	Cre02.g092500.t1.1	PF09416,PF04851	PTHR10887:SF26,PTHR10887	KOG1802	3.6.4.-	K14326	GO:0000184,GO:0003677,GO:0004386,GO:0005524,GO:0005737,GO:0008270,GO:0016787	AT5G47010.1	ATUPF1,LBA1,UPF1	RNA helicase, putative
			Cre02.g092550	#N/A	30785727	Cre02.g092550.t1.1	Cre02.g092550.t1.1		PTHR10516,PTHR10516:SF27	KOG0553				AT5G21990.1		Tetratricopeptide repeat (TPR)-like superfamily protein
			Cre02.g092600	#N/A	30784921	Cre02.g092600.t1.2	Cre02.g092600.t1.2	PF01218	PTHR10755	KOG1518			GO:0004109,GO:0006779,GO:0055114	AT1G03475.1	ATCPO-I,HEMF1,LIN2	Coproporphyrinogen III oxidase
			Cre02.g092650	#N/A	30786337	Cre02.g092650.t1.1	Cre02.g092650.t1.1
			Cre02.g092700	#N/A	30786300	Cre02.g092700.t1.2	Cre02.g092700.t1.2		PTHR15504
			Cre02.g092750	#N/A	30785338	Cre02.g092750.t1.1	Cre02.g092750.t1.1	PF01728,PF01585	PTHR16121		2.1.1.-	K14590	GO:0003676,GO:0008168,GO:0032259,GO:0005622
			Cre02.g092800	#N/A	30786325	Cre02.g092800.t1.2	Cre02.g092800.t1.2
			Cre02.g092850	#N/A	30785179	Cre02.g092850.t1.2	Cre02.g092850.t1.2	PF00560	PTHR10588:SF28,PTHR10588			K10411	GO:0005515	AT1G48540.1		Outer arm dynein light chain 1 protein
			Cre02.g092900	#N/A	30785877	Cre02.g092900.t1.2	Cre02.g092900.t1.2	PF00733,PF00117,PF00958	PTHR11922:SF2,PTHR11922	KOG1622	6.3.5.2	K01951	GO:0004066,GO:0006529,GO:0003922,GO:0005524,GO:0006164,GO:0006177	AT1G63660.1		GMP synthase (glutamine-hydrolyzing), putative / glutamine amidotransferase, putative
			Cre02.g092926	#N/A	30784865	Cre02.g092926.t1.1	Cre02.g092926.t1.1
			Cre02.g092950	#N/A	30785619	Cre02.g092950.t1.2	Cre02.g092950.t1.2
			Cre02.g092983	#N/A	30786430	Cre02.g092983.t1.1	Cre02.g092983.t1.1
			Cre02.g093017	#N/A	30786390	Cre02.g093017.t1.1	Cre02.g093017.t1.1
			Cre02.g093051	#N/A	30785068	Cre02.g093051.t1.1	Cre02.g093051.t1.1	PF00078	PTHR19446				GO:0003723,GO:0003964,GO:0006278	AT4G20520.1		RNA binding;RNA-directed DNA polymerases
			Cre02.g093084	#N/A	30785970	Cre02.g093084.t1.1	Cre02.g093084.t1.1
			Cre02.g093117	#N/A	30785205	Cre02.g093117.t1.1	Cre02.g093117.t1.1
			Cre02.g093150	#N/A	30785404	Cre02.g093150.t1.2	Cre02.g093150.t1.2
			Cre02.g093150	#N/A	30785405	Cre02.g093150.t2.1	Cre02.g093150.t2.1
			Cre02.g093202	#N/A	30784804	Cre02.g093202.t1.1	Cre02.g093202.t1.1	PF00078	PTHR19446				GO:0003723,GO:0003964,GO:0006278
			Cre02.g093252	#N/A	30786219	Cre02.g093252.t1.1	Cre02.g093252.t1.1
			Cre02.g093300	#N/A	30785331	Cre02.g093300.t1.1	Cre02.g093300.t1.1	PF08216	PTHR14978	KOG2734		K12864		AT3G02710.1		ARM repeat superfamily protein
			Cre02.g093350	#N/A	30785928	Cre02.g093350.t1.1	Cre02.g093350.t1.1
			Cre02.g093350	#N/A	30785929	Cre02.g093350.t2.1	Cre02.g093350.t2.1
			Cre02.g093401	#N/A	30784906	Cre02.g093401.t1.1	Cre02.g093401.t1.1
			Cre02.g093450	#N/A	30786142	Cre02.g093450.t1.2	Cre02.g093450.t1.2	PF00274	PTHR11627	KOG1557	4.1.2.13	K01623	GO:0004332,GO:0006096	AT4G26530.1		Aldolase superfamily protein
			Cre02.g093550	#N/A	30785430	Cre02.g093550.t1.1	Cre02.g093550.t1.1	PF00211	PTHR11920:SF149,PTHR11920				GO:0009190,GO:0016849,GO:0035556
			Cre02.g093600	#N/A	30785266	Cre02.g093600.t1.2	Cre02.g093600.t1.2	PF03061
			Cre02.g093650	#N/A	30786274	Cre02.g093650.t1.2	Cre02.g093650.t1.2	PF00355					GO:0016491,GO:0051537,GO:0055114	AT1G71500.1		Rieske (2Fe-2S) domain-containing protein
			Cre02.g093700	#N/A	30785306	Cre02.g093700.t1.1	Cre02.g093700.t1.1	PF12409,PF00702,PF00122	PTHR24093,PTHR24093:SF56	KOG0208	3.6.3.-	K13526	GO:0003824,GO:0008152,GO:0000166,GO:0046872	AT5G23630.1	MIA,PDR2	phosphate deficiency response 2
			Cre02.g093700	#N/A	30785307	Cre02.g093700.t2.1	Cre02.g093700.t2.1	PF12409,PF00702,PF00122	PTHR24093,PTHR24093:SF56	KOG0208	3.6.3.-	K13526	GO:0003824,GO:0008152,GO:0000166,GO:0046872	AT5G23630.1	MIA,PDR2	phosphate deficiency response 2
			Cre02.g093750	#N/A	30786225	Cre02.g093750.t1.2	Cre02.g093750.t1.2	PF08534,PF00578	PTHR13871,PTHR13871:SF19	KOG2501			GO:0016491,GO:0016209	AT1G60420.1		DC1 domain-containing protein
			Cre02.g093800	#N/A	30785925	Cre02.g093800.t1.2	Cre02.g093800.t1.2		PTHR13871,PTHR13871:SF20					AT1G60420.1		DC1 domain-containing protein
			Cre02.g093800	#N/A	30785926	Cre02.g093800.t2.1	Cre02.g093800.t2.1		PTHR13871,PTHR13871:SF20					AT1G60420.1		DC1 domain-containing protein
			Cre02.g093850	#N/A	30785158	Cre02.g093850.t1.1	Cre02.g093850.t1.1	PF00560	PTHR26343:SF50,PTHR26343	KOG0472			GO:0005515	AT3G15410.2		Leucine-rich repeat (LRR) family protein
			Cre02.g093900	#N/A	30784883	Cre02.g093900.t1.2	Cre02.g093900.t1.2
			Cre02.g093950	#N/A	30786075	Cre02.g093950.t1.2	Cre02.g093950.t1.2	PF00696	PTHR26059,PTHR26059:SF1		2.7.4.22	K09903	GO:0008652	AT3G18680.1		Amino acid kinase family protein
			Cre02.g093975	#N/A	30786395	Cre02.g093975.t1.1	Cre02.g093975.t1.1	PF00076	PTHR23139,PTHR23139:SF9	KOG0120		K12837	GO:0003676	AT1G60900.1		U2 snRNP auxilliary factor, large subunit, splicing factor
			Cre02.g093975	#N/A	30786396	Cre02.g093975.t2.1	Cre02.g093975.t2.1	PF00076	PTHR23139,PTHR23139:SF9	KOG0120		K12837	GO:0003676	AT4G36690.1	ATU2AF65A	U2 snRNP auxilliary factor, large subunit, splicing factor
			Cre02.g093975	#N/A	30786397	Cre02.g093975.t3.1	Cre02.g093975.t3.1
			Cre02.g094050	#N/A	30785867	Cre02.g094050.t1.1	Cre02.g094050.t1.1	PF01663	PTHR23071				GO:0003824	AT5G17250.1		Alkaline-phosphatase-like family protein
			Cre02.g094100	#N/A	30786177	Cre02.g094100.t1.2	Cre02.g094100.t1.2	PF08534,PF00578	PTHR13871,PTHR13871:SF21	KOG2501			GO:0016491,GO:0016209	AT1G60420.1		DC1 domain-containing protein
			Cre02.g094150	#N/A	30785337	Cre02.g094150.t1.2	Cre02.g094150.t1.2	PF06203,PF00072	PTHR26402:SF303,PTHR26402			K12128	GO:0005515,GO:0000156,GO:0000160,GO:0006355	AT2G46790.1	APRR9,PRR9,TL1	pseudo-response regulator 9
			Cre02.g094200	#N/A	30786345	Cre02.g094200.t1.1	Cre02.g094200.t1.1	PF00083	PTHR24063,PTHR24063:SF155	KOG0253			GO:0016021,GO:0022857,GO:0055085	AT3G13050.1		Major facilitator superfamily protein
			Cre02.g094250	#N/A	30785359	Cre02.g094250.t1.1	Cre02.g094250.t1.1	PF00153	PTHR24089:SF36,PTHR24089	KOG0769				AT2G39970.1		Mitochondrial substrate carrier family protein
			Cre02.g094300	#N/A	30786195	Cre02.g094300.t1.2	Cre02.g094300.t1.2	PF05187,PF00890	PTHR10617:SF1,PTHR10617	KOG2415	1.5.5.1	K00311	GO:0004174,GO:0055114,GO:0009055,GO:0016491	AT2G43400.1	ETFQO	electron-transfer flavoprotein:ubiquinone oxidoreductase
			Cre02.g094350	#N/A	30785982	Cre02.g094350.t1.1	Cre02.g094350.t1.1	PF00514	PTHR23316	KOG0166			GO:0005515	AT1G02690.2	IMPA-6	importin alpha isoform 6
			Cre02.g094400	#N/A	30785049	Cre02.g094400.t1.2	Cre02.g094400.t1.2
			Cre02.g094426	#N/A	30786359	Cre02.g094426.t1.1	Cre02.g094426.t1.1
			Cre02.g094450	#N/A	30784825	Cre02.g094450.t1.2	Cre02.g094450.t1.2	PF12499		KOG3454
			Cre02.g094500	#N/A	30785771	Cre02.g094500.t1.2	Cre02.g094500.t1.2	PF01165					GO:0003735,GO:0005622,GO:0005840,GO:0006412
			Cre02.g094551	#N/A	30785083	Cre02.g094551.t1.1	Cre02.g094551.t1.1
			Cre02.g094600	#N/A	30786085	Cre02.g094600.t1.1	Cre02.g094600.t1.1	PF03415,PF00431	PTHR10895
			Cre02.g094650	#N/A	30786110	Cre02.g094650.t1.2	Cre02.g094650.t1.2	PF01926,PF01018	PTHR11702:SF3,PTHR11702			K03979	GO:0000287,GO:0003924,GO:0005525,GO:0005622	AT1G07615.1		GTP-binding protein Obg/CgtA
			Cre02.g094700	#N/A	30785360	Cre02.g094700.t1.2	Cre02.g094700.t1.2
			Cre02.g094750	#N/A	30786447	Cre02.g094750.t1.2	Cre02.g094750.t1.2
			Cre02.g094750	#N/A	30786448	Cre02.g094750.t2.1	Cre02.g094750.t2.1
			Cre02.g094801	#N/A	30785731	Cre02.g094801.t1.1	Cre02.g094801.t1.1
			Cre02.g094850	#N/A	30784891	Cre02.g094850.t1.1	Cre02.g094850.t1.1			KOG3262
			Cre02.g094900	#N/A	30785969	Cre02.g094900.t1.1	Cre02.g094900.t1.1	PF00515	PTHR23083,PTHR23083:SF20	KOG0550			GO:0005515	AT4G37460.1	SRFR1	Tetratricopeptide repeat (TPR)-like superfamily protein
			Cre02.g095000	#N/A	30785376	Cre02.g095000.t1.2	Cre02.g095000.t1.2							AT2G19690.2	PLA2-BETA	phospholipase A2-beta
			Cre02.g095032	#N/A	30786061	Cre02.g095032.t1.1	Cre02.g095032.t1.1	PF03372,PF00078	PTHR19446				GO:0003723,GO:0003964,GO:0006278
			Cre02.g095033	#N/A	30786311	Cre02.g095033.t1.1	Cre02.g095033.t1.1
			Cre02.g095034	#N/A	30785146	Cre02.g095034.t1.1	Cre02.g095034.t1.1
			Cre02.g095035	#N/A	30785710	Cre02.g095035.t1.1	Cre02.g095035.t1.1
			Cre02.g095036	#N/A	30786226	Cre02.g095036.t1.1	Cre02.g095036.t1.1
			Cre02.g095037	#N/A	30785775	Cre02.g095037.t1.1	Cre02.g095037.t1.1
			Cre02.g095038	#N/A	30786305	Cre02.g095038.t1.1	Cre02.g095038.t1.1
			Cre02.g095039	#N/A	30786076	Cre02.g095039.t1.1	Cre02.g095039.t1.1
			Cre02.g095039	#N/A	30786077	Cre02.g095039.t2.1	Cre02.g095039.t2.1
			Cre02.g095040	#N/A	30785339	Cre02.g095040.t1.1	Cre02.g095040.t1.1
			Cre02.g095041	#N/A	30785059	Cre02.g095041.t1.1	Cre02.g095041.t1.1
			Cre02.g095042	#N/A	30786039	Cre02.g095042.t1.1	Cre02.g095042.t1.1
			Cre02.g095043	#N/A	30786101	Cre02.g095043.t1.1	Cre02.g095043.t1.1
			Cre02.g095044	#N/A	30785852	Cre02.g095044.t1.1	Cre02.g095044.t1.1		PTHR11439,PTHR11439:SF127
			Cre02.g095045	#N/A	30785065	Cre02.g095045.t1.1	Cre02.g095045.t1.1	PF00628	PTHR12706	KOG1513			GO:0005515	AT1G79350.1	EMB1135	RING/FYVE/PHD zinc finger superfamily protein
[truncated: 17,526 more rows]

## Sheet: Sheet1
S1 Table: List of detected genes by ChIP-seq analysis
Peak No.	P-value*	Chr.	Peak region*	Center of peak1	Candidate gene2	Peak position3	Gene name	Description	2nd candidate gene4
1	5.55866e-31	3	769513..769854	769682	Cre03.g146267	5'-UTR		CCCH-type zinc finger protein with ARM repeat domain
2	2.52629e-22	12	7234635..7234977	7234809	Cre12.g558300	5'-UTR		Protein kinase superfamily protein with octicosapeptide/Phox/Bem1p domain
3	2.05216e-17	4	1587651..1587996	1587828	Cre04.g213350	Upstream
4	4.46321e-14	9	6937027..6937366	6937196	Cre09.g410450	Upstream	ROC15	Homeodomain-like superfamily protein
5	1.42972e-13	10	1023607..1023949	1023781	Cre10.g425050	Upstream	ROC28/59	transducin family protein / WD-40 repeat family protein
6	8.00432e-13	3	9199055..9199400	9199224	Cre03.g213089	Upstream
7	1.3541e-12	6	4822009..4822346	4822178	Cre06.g278200	Upstream	ROC66	CONSTANS-like 4
8	4.28243e-12	6	3139446..3139793	3139615	Cre06.g275350	5'-UTR	ROC40	Homeodomain-like superfamily protein
9	1.27333e-11	10	6365857..6366215	6366026	Cre10.g465550	5'-UTR	CLPD1	ClpD chaperone, Hsp100 family, probably chloroplastic (by homology); possibly acting as ATP-dependent subunit of Clp protease
10	1.26248e-10	6	5727919..5728260	5728092	Cre06.g286950	Upstream		ankyrin repeat family protein
11	2.20365e-08	2	1447784..1448128	1447953	Cre02.g083750	5'-UTR	ROC75	Homeodomain-like superfamily protein
12	2.37135e-08	16	6492898..6493255	6493087	Cre16.g673100	5'-UTR
13	5.77798e-07	11	544463..544807	544639	Cre11.g467605	5'-UTR
14	6.14457e-07	16	6421820..6422187	6421989	Cre16.g673600	5'-UTR		ataurora3
15	9.95319e-07	1	3022501..3022838	3022670	Cre01.g018650	Upstream		breast cancer associated RING 1
16	3.16003e-06	11	3387768..3388115	3387947	Cre11.g480551	Upstream
17	6.09525e-06	16	5723276..5723614	5723445	Cre16.g678900	5'-UTR		CHASE domain containing histidine kinase protein
18	6.98283e-06	1	3285241..3285579	3285411	Cre01.g020751	Upstream
19	2.85236e-05	7	2859941..2860278	2860110	Cre07.g332250	5'-UTR
20	6.00213e-05	16	5411242..5411583	5411411	Cre16.g681351	Upstream			Cre16.g681352
21	0.00013769	1	179158..179504	179327	Cre01.g001300	Upstream
22	0.000140359	14	500151..500514	500320	Cre14.g611300	5'-UTR	Channelrhodopsin 1	Light-gated proton channel rhodopsin 1
23	0.000140879	16	6889602..6890107	6889771	Cre16.g676421	5'-UTR	CrPRR1	CCT motif-containing response regulator protein, Similar to TOC1
24	0.00031202	12	9683494..9683840	9683672	Cre12.g555803	5'-UTR	NDA6	Putative NADH dehydrogenase; disulfide oxidoreductase/ electron carrier
25	0.000486588	13	4681464..4681816	4681633	Cre13.g604450	5'-UTR
26	0.000538177	10	1219093..1219433	1219265	Cre10.g426500	Upstream			Cre10.g426450
27	0.00065135	1	7956300..7956668	7956469	Cre01.g066917	Upstream	LHCBM1	Chlorophyll a-b binding protein of LHCI; photosystem II light harvesting complex gene 2.2I
28	0.000767116	3	3014396..3014735	3014567	Cre03.g163900	5'-UTR	PWR3	PWR motif protein; belongs to a family of 4 genes with no clear homologues in other organisms, except for a similarity with DUF506 proteins (plant-specific, unknown function).	Cre03.g163850
29	0.000815425	14	1362008..1362366	1362177	Cre14.g617150	3'-UTR	RLS4	MBOAT (membrane bound O-acyl transferase) family protein	Cre14.g617151
30	0.000842948	5	2863890..2864251	2864059	Cre05.g237910	Downstream			Cre05.g237890
31	0.00095882	3	2485299..2485647	2485468	Cre03.g159600	Upstream
32	0.0012047	7	1676832..1677170	1677001	Cre07.g325500	5'-UTR	CHLH1/MCH1	Magnesium chelatase H subunit, chloroplast precursor; Chlamydomonas mutants with defects in this protein are chl1 and brs-1 and result in a brown phenotype [PMID: 11713666; PMID: 4436384].
33	0.00135951	17	5637984..5638321	5638153	Cre17.g738150	3'-UTR	ERM10	Transmembrane protein with a DUF221 domain of unknown function; this domain is present in many eukaryotes, in particular in Arabidopsis ERD4 (early response to dehydration)
34	0.00142433	16	591018..591371	591203	Cre16.g692250	5'-UTR
35	0.0019143	2	6099273..6099632	6099464	Cre02.g113200	Intron	GLN1	Glutamine synthetase (EC 6.3.1.2), CO2-responsive gene; glutamine synthetase, cytosolic isozyme (Glutamate--ammonia ligase) (GS1), CO2-responsive gene; identical to GLNA1_CHLRE cDNA [Swissprot Q42688), PMID: 8938407].
36	0.00222719	6	6843124..6843487	6843319	Cre06.g295200	Upstream	CPH1	Most similar to plant cryptochromes; (CRY1) (PMID: 7632915); contains 6-4 photolyase and FAD-binding domains
37	0.00242908	6	2765582..2765926	2765751	Cre06.g270950	Upstream
38	0.00326518	10	5520783..5521129	5520961	Cre10.g459350	3'-UTR	OPR49/RAP5		Cre10.g459300
39	0.00332411	1	2681549..2681895	2681718	Cre01.g015850	Downstream	FAP68	Flagellar Associated Protein; found in the flagellar proteome [PMID: 15998802]; in basal body proteome as BUG17 [PMID: 15964273]. Transcript upregulated during flagellar regeneration [PMID: 15738400]
40	0.00339513	16	5400325..5400667	5400499	Cre16.g681400	Upstream
41	0.00356036	16	2744901..2745240	2745070	Cre16.g662702	5'-UTR
42	0.00357624	10	4071627..4071971	4071803	Cre10.g449501	3'-UTR			Cre10.g449450
43	0.00502756	6	5437383..5437731	5437552	Cre06.g284250	5'-UTR	LHCBM8	Chlorophyll a-b binding protein of LHCII; photosystem II light harvesting complex gene 2.1
44	0.00575206	13	3963822..3964161	3963993	Cre13.g590900	Upstream	APC11	Subunit of anaphase promoting complex; contains a RING domain.	Cre13.g590850
45	0.00615184	12	8443487..8443830	8443656	Cre12.g548400	Upstream	LHCBM2	Encoding a light-harvesting antenna protein for PS2. This gene was reported under the name of LhcII-3 in PMID: 11522911, and the sequence has been deposited in Genbank (AB051205). Also designated as LhcbM2 in PMID: 16143838 and as Lhcbm2 in PMID: 14652691; photosystem II light harvesting complex gene 2.2	Cre12.g548391
46	0.00629975	3	6044295..6044634	6044466	Cre03.g191250	5'-UTR	LCI34	Low-CO2 inducible gene revealed by cDNA array analyses; TargetP prediction: Mitochondria (confidence: 4); regulated by CCM1. PMID:15235119
47	0.0085111	6	3972441..3972784	3972610	Cre06.g278193	Upstream
48	0.00886787	11	3562668..3563012	3562837	Cre11.g481700	3'-UTR	SPL17		Cre11.g481650
49	0.0106663	1	4522110..4522450	4522282	Cre01.g030750	Upstream			Cre01.g030800
50	0.0110946	6	3578944..3579297	3579129	Cre06.g278120	Upstream
51	0.011508	4	3558060..3558423	3558255	Cre04.g228350	Upstream	DLA4	2-oxoacid dehydrogenases acyltransferase family protein
52	0.0116674	7	3029497..3029844	3029676	Cre07.g333500	Upstream
53	0.0117418	6	6918422..6918772	6918604	Cre06.g296050	5'-UTR	FMO6	Uses NADPH and non-covalently-bound FAD to catalyse the oxygenation of nucleophilic nitrogen, sulphur, phosphorous and selenium atoms; important for xenobiotic detoxification; linked to FMO3 and FMO7
54	0.012648	2	1447220..1447558	1447390	Cre02.g083700	Downstream	LSP1	Putative signal transducer for phototaxis; essential for normal phototaxis behavior [PMID: 15657081, independent sequence: AB194902]
55	0.0128055	2	1196361..1196710	1196530	Cre02.g081950	5'-UTR
56	0.0136587	6	5548682..5549020	5548851	Cre06.g285250	5'-UTR	LHCBM6	Chloropyll a-b binding protein of LHCII type I, chloroplast precursor; photosystem II light harvesting complex gene 2.1
57	0.0141708	13	3556859..3557202	3557028	Cre13.g588150	Upstream		galactose-1-phosphate guanylyltransferase (GDP)s;GDP-D-glucose phosphorylases;quercetin 4\'-O-glucosyltransferases
58	0.0148138	6	5405686..5406028	5405855	Cre06.g283950	Upstream	LHCBM4	PSII-associated chlorophyll a/b-binding protein. Identified in the eyespot phosphoproteome by Wagner et al. 2008 [PMID: 18065559]; photosystem II light harvesting complex gene 2.1
59	0.0150387	7	5747311..5747710	5747480	Cre07.g352950	Downstream
60	0.0152676	1	2498038..2498395	2498207	Cre01.g014200	Upstream			Cre01.g014250
61	0.0170486	7	5747846..5748186	5748018	Cre07.g352950	Downstream
62	0.0175428	3	6531376..6531714	6531545	Cre03.g195388	Upstream			Cre03.g195366
63	0.017713	2	2693540..2693968	2693709	Cre02.g093500	Upstream	SSD1	Contains a sterol sensing 5-transmembrane domain similar to those in SCAP, Patched, NPC1 and HMGR
64	0.0178787	16	1056178..1056518	1056347	Cre16.g649433	Upstream		ethylene-responsive element binding protein
65	0.0184002	6	6878996..6879336	6879165	Cre06.g295600	Upstream	RME1	mRNA adenosine methylase	Cre06.g295550
66	0.0188188	13	2410747..2411113	2410916	Cre13.g579650	5'-UTR		PB1 domain-containing protein tyrosine kinase
67	0.0193895	5	2238389..2238737	2238558	Cre05.g234660	5'-UTR
68	0.0202636	9	7064060..7064404	7064236	Cre09.g411500	3'-UTR	URN4	inosine-uridine preferring nucleoside hydrolase family protein	Cre09.g411525
69	0.0212811	7	1902731..1903080	1902900	Cre07.g325741	5'-UTR	PTB2	Gi|21218058|dbj|AB074881.1 Putative phosphate transporter, similar to yeast Pho89 and Neurospora PHO4 probable Na+/Pi symporters; clusters with PTB3 on scaffold 81.	Cre07.g325741
70	0.0226194	15	91948..92305	92117	Cre15.g634750	Upstream		Protein of unknown function (DUF506)	Cre15.g634800
71	0.0228984	6	5311746..5312096	5311928	Cre06.g283050	5'-UTR	LHCA1	Light-harvesting protein of photosystem I; photosystem I light harvesting complex gene 1
72	0.0229631	3	2033485..2033824	2033654	Cre03.g156200	CDS
73	0.0241118	4	3062935..3063274	3063104	Cre04.g225250	5'-UTR
74	0.0247435	3	2107915..2108291	2108084	Cre03.g156900	Upstream	LHCBM5	Chlorophyll a-b binding protein of LHCII; photosystem II light harvesting complex gene 2.2
75	0.0249966	17	3114450..3114805	3114619	Cre17.g721400	Upstream			Cre17.g721350
76	0.0253449	13	1595553..1595902	1595734	Cre13.g573400	Upstream			Cre13.g573351
77	0.025514	8	209773..210119	209942	Cre08.g358547	3'-UTR
78	0.0260612	3	8595061..8595398	8595230	Cre03.g202785	5'-UTR
79	0.027135	9	684140..684479	684311	Cre09.g402950	5'-UTR	CGL21	Conserved protein of unknown function	Cre09.g402900
80	0.0271907	16	2813355..2813692	2813524	Cre16.g663200	Upstream	FAP295	Flagellar Associated Protein, found in the flagellar proteome [PMID: 15998802]
81	0.0275972	1	1598301..1598649	1598481	Cre01.g008402	5'-UTR		protein kinase family protein / protein phosphatase 2C ( PP2C) family protein; TGF-BETA-ACTIVATED KINASE 1
1 P-value, Peak region, and Center of peak are result of the peak calling algorithm of CLC Genomic Workbench version 7.5.1.
2 The gene at or closest to the Center of peak is shown.
3 The position of Center of peak in the candidate gene is shown. For peaks lying in intergenic regions, the position relative to the candidate gene (upstream or downstream) is shown.
4 The secondary candidate gene is shown when the second closest gene was found within 250 bp of the Center of peak.
